# Supplementary material
Source: publisher figshare collection journal article supplement (https://gsapubs.figshare.com/ndownloader/files/22409583)
Supplement: Supplementary file 1 [file 22409583]

## Sheet: Instructions
	McKay, M.P., Coble, M.A., Hessler, A.M., Weislogel, A.L., and Fildani, A., 2016, Petrogenesis and provenance of distal volcanic tuffs from the Permian–Triassic Karoo Basin, South Africa: A window into a dissected magmatic province: Geosphere, v. 12, doi:10.1130/GES01215.1.

## Sheet: Table 1. Whole rock ICPMS-XRF
South Africa Tuff XRF and ICPMS (this study)		SiO2	TiO2	Al2O3	FeO*	MnO	MgO	CaO	Na2O	K2O	P2O5	LOI (%)	Sum		Ni	Cr	Sc	V	Ba	Rb	Sr	Zr	Y	Nb	Ga	Cu	Zn	Pb	La	Ce	Th	Nd	U	Cs		NiO	Cr2O3	Sc2O3	V2O3	BaO	Rb2O	SrO	ZrO2	Y2O3	Nb2O5	Ga2O3	CuO	ZnO	PbO
	14ZA161A	68.3809	0.595099	15.724	3.66705	0.0462924	1.01647	0.235976	0.66234	3.39332	0.0252252	5.71292	99.4596		16.038	33.759	9.504	62.271	743.193	145.53	93.852	224.235	13.86	13.266	19.503	20.889	60.192	26.235	33.462	27.324	16.137	22.572	2.475	1584.3	0.15843	20.4088	49.3413	14.5778	91.6084	829.774	159.152	110.99	302.897	17.6015	18.9776	26.2166	26.1486	74.9246	28.261
	14ZA162A	63.5945	0.597217	16.6183	3.92446	0.0618849	1.46911	1.19754	0.897405	3.61945	0.128749	7.44753	99.5561		27.918	50.292	11.682	67.914	752.994	168.894	284.724	211.761	36.432	15.444	20.394	32.571	76.824	39.402	24.156	99.693	23.562	26.433	3.366	1974.46	0.197446	35.5264	73.5055	17.9185	99.9099	840.717	184.702	336.717	286.047	46.2669	22.0933	27.4143	40.7719	95.6275	42.4448
	14ZA168A	62.6703	0.735421	17.138	5.2163	0.0494703	1.40063	0.473646	1.39526	4.54943	0.0859914	5.44994	99.1643		15.741	60.39	14.751	111.771	841.104	219.879	151.569	155.232	20.394	14.949	24.948	10.989	72.963	29.007	49.599	49.203	18.612	30.294	4.059	1895.45	0.189545	20.0308	88.2645	22.6259	164.429	939.092	240.46	179.247	209.687	25.8994	21.3852	33.536	13.7559	90.8215	31.247
	13ZA93A-PWD	60.124	0.88041	17.0193	7.3544	0.07832	2.04014	0.86984	1.76347	4.47263	0.09436	4.96272	99.6596		29.5	73.3	16.5	118.7	524.5	216.2	106	153.6	32.6	18.9	25.2	17.8	117.6	32.9	50	96.6	19.9	44.1	12.1	21.8	10.3	37.5395	107.133	25.3086	174.622	585.604	236.436	125.356	207.483	41.4004	27.0373	33.8747	22.2818	146.384	35.4407
	14ZA130A	62.7187	0.7893	17.1426	4.77611	0.04598	1.67669	0.64957	0.97553	4.44342	0.22918	6.02625	99.4733		26	56.5	14.3	96.7	545.6	216.7	139.5	196	43.6	16.9	25.1	34.3	107.9	29.1	65.5	42.2	19.2	74.2	5.4	13.6	16.1	33.0857	82.5789	21.9341	142.258	609.162	236.983	164.974	264.757	55.3699	24.1762	33.7403	42.9363	134.31	31.3472
	14ZA130A R	62.4652	0.78777	17.0081	4.75259	0.04591	1.66966	0.71428	0.98192	4.41929	0.22892	6.03	99.1036		25.1	56.4	15.1	98.5	544.2	216.7	138.7	195	42.7	16.2	23.5	31.6	108.3	28.1	64.9	39.6	19.5	72	4.6	10.1	8.8	31.9404	82.4328	23.1612	144.906	607.599	236.983	164.028	263.406	54.2269	23.1748	31.5895	39.5564	134.808	30.27
	14ZA130A	62.7187	0.7893	17.1426	4.77611	0.04598	1.67669	0.64957	0.97553	4.44342	0.22918	6.02625	99.4733		26	56.5	14.3	96.7	545.6	216.7	139.5	196	43.6	16.9	25.1	34.3	107.9	29.1	65.5	42.2	19.2	74.2	5.4	13.6	16.1	33.0857	82.5789	21.9341	142.258	609.162	236.983	164.974	264.757	55.3699	24.1762	33.7403	42.9363	134.31	31.3472
	14ZA130A	62.1997	0.801177	17.3361	5.11469	0.0560142	1.70663	0.658102	0.924165	4.51356	0.238758	6.07145	99.6203		24.057	58.212	15.048	101.079	570.339	222.156	135.729	186.615	48.411	16.533	25.245	32.67	111.771	28.809	74.943	54.054	20.394	80.784	4.356	1811.21	0.181121	30.6132	85.0811	23.0815	148.7	636.783	242.95	160.514	252.08	61.4796	23.6512	33.9352	40.8959	139.128	31.0337
	SUTHER	38.0601	0.32922	16.379	3.44612	0.60304	1.66536	14.8998	1.10775	3.67297	0.12842	18.5369	98.8288		16	8.9	6	44.8	1187.9	156.7	272.7	135.6	26.3	6.9	17.9	17.3	69.9	19.7	26.3	53.4	22.3	26.4	2.1	9.8	0	20.3604	13.008	9.20313	65.9064	1326.29	171.367	322.497	183.169	33.3997	9.87074	24.0618	21.6559	87.0088	21.2213
	13ZA72A	8.16948	0.11255	3.00829	0.97904	0.01179	1.53202	46.1691	0.10708	0.61024	0.082	38.2525	99.0341		4.3	13.7	0	19.6	188.8	34	330.9	23.9	36.9	2.3	4.9	5.4	17.3	4.3	33.4	15.1	2.1	25.7	3.4	0	0	5.47186	20.0236	0	28.834	210.795	37.1824	391.325	32.2841	46.8612	3.29025	6.58675	6.75964	21.5344	4.63206
	14ZA129A	50.3156	0.57327	14.0794	3.76987	0.1062	1.70263	11.441	0.57808	3.39862	0.12702	13.5593	99.6511		22.8	46.1	12.3	100.4	487.9	167.6	74.9	133.6	39.9	12.8	20.5	18.8	87.7	25.1	36.3	66.8	15.3	29.6	4.2	16.2	8.8	29.0136	67.3786	18.8664	147.701	544.74	183.287	88.5772	180.467	50.671	18.3109	27.5568	23.5336	109.166	27.0383
	BLOUKRANS	58.4317	0.55675	16.5632	3.58724	0.14133	1.79267	5.23096	2.07128	3.98074	0.31229	7.2449	99.913		19.5	35.7	12.5	91.2	1151.7	173.6	198.1	243.7	46.5	18.7	21.7	67.7	86.2	60.3	38.4	88.6	18.4	40.7	5	8.6	12.3	24.8143	52.1782	19.1732	134.167	1285.87	189.849	234.274	329.19	59.0527	26.7511	29.1699	84.7459	107.298	64.9566
	14ZA129A	56.4957	0.66128	16.5415	4.47062	0.0959112	1.99542	5.11721	0.540233	4.10515	0.1327	9.32984	99.4856		25.938	53.856	15.147	120.879	524.601	199.386	65.736	140.382	35.046	14.949	23.859	22.374	105.237	24.849	36.135	68.805	17.82	29.997	2.772	1527.77	0.152777	33.0068	78.7145	23.2333	177.828	585.717	218.049	77.7398	189.628	44.5067	21.3852	32.0721	28.0075	130.995	26.7679
	12ZA45	63.4116	0.52373	17.1343	3.3936	0.02393	1.63796	0.81502	1.2192	3.49848	0.1066	7.45643	99.2209		9.5	27.2	9	50.9	629.2	160.7	155.6	248.7	26.2	20.1	21.6	18.4	67.9	24	63.1	80.5	22.5	43.3	4.3	15	4.5	12.089	39.7548	13.8047	74.8802	702.501	175.742	184.014	335.944	33.2727	28.7539	29.0355	23.0329	84.5192	25.8534
	14ZA128A	53.9526	0.53102	12.232	2.87953	0.08035	2.23417	10.8998	1.68949	3.18093	0.33468	11.7422	99.7567		17.9	32.1	10.1	77	458.2	145	287.7	191.8	37.4	12.1	16.8	28.1	65.1	23	44	80.8	13.8	40.3	3.2	11.1	17.9	22.7782	46.9165	15.4919	113.277	511.58	158.572	340.236	259.083	47.4962	17.3096	22.5831	35.1752	81.0339	24.7761
	14ZA128A	54.4282	0.546698	12.5294	3.07718	0.0789624	2.32493	9.75614	1.677	3.23243	0.334046	11.1427	99.1277		19.206	35.145	9.405	75.24	475.893	146.619	275.22	194.238	38.313	12.276	16.632	29.205	65.142	22.374	47.619	77.319	13.563	38.907	3.96	1596.28	0.159628	24.4401	51.367	14.4259	110.687	531.334	160.343	325.477	262.377	48.6556	17.5613	22.3573	36.5584	81.0862	24.1018
	12ZA46	63.2132	0.62544	16.6703	5.58691	0.0464	1.66272	1.41141	0.93628	4.47908	0.15685	5.18969	99.9783		22.1	50.2	13.8	102	784.6	229.4	456.1	118.7	34	14.3	25.8	19.8	101.8	27.6	34	61.5	17.4	31.2	4.6	22.2	22.5	28.1228	73.371	21.1672	150.055	876.005	250.872	539.387	160.34	43.1783	20.4568	34.6812	24.7854	126.717	29.7314
	13ZA75B-PWD	65.1996	0.56555	16.8881	3.82614	0.09928	1.24901	1.47834	1.63064	2.84247	0.1652	5.81059	99.755		18.3	83.1	8.2	56.2	575.7	133.7	575.2	214.9	30.9	15.9	20.2	17.7	64.7	54	59.9	86.6	23.4	51.1	5.4	11.9	13.3	23.2872	121.457	12.5776	82.6772	642.769	146.214	680.235	290.287	39.2415	22.7456	27.1535	22.1566	80.536	58.1701
	12ZA16-WT-L	42.6889	0.40164	11.759	2.26338	0.05483	1.66879	17.8202	1.15931	2.92271	0.7413	17.657	99.137		14.4	25.7	7.4	63.6	779.1	122.4	397	164.3	49.1	10.2	15.1	116.9	89.2	33.5	54.6	93.6	12.5	51.8	10.5	3	0	18.3244	37.5625	11.3505	93.5635	869.865	133.857	469.495	221.936	62.3546	14.5915	20.2979	146.334	111.033	36.087
	13ZA76	60.9608	0.66605	17.7627	4.10374	0.03765	1.99424	1.2308	1.80657	4.62878	0.10927	6.55576	99.8563		20.9	36	10	75.6	1208.9	192.2	130.3	267.4	24.8	19	25.3	26.7	93.7	35.4	20.4	64.5	24.8	24.6	4.8	12.5	17.4	26.5958	52.6167	15.3386	111.217	1349.74	210.19	154.094	361.204	31.4948	27.1803	34.0091	33.4227	116.634	38.1337
	12ZA12	23.4515	0.28914	5.97739	1.90125	0.281	0.96277	35.1363	0.70799	1.42892	0.1242	29.0178	99.2782		12	21.4	2.4	41.7	199.2	71.1	152	71.2	23.9	5.8	8.8	12.4	40.2	12	47.7	55.5	6.4	28.4	0.3	0	3	15.2703	31.2777	3.68125	61.3459	222.407	77.755	179.756	96.177	30.3518	8.29715	11.8293	15.5221	50.0394	12.9267
	13ZA77-PWD	69.2933	0.64076	13.5711	3.04822	0.2302	1.08004	2.58204	2.37039	2.30811	0.21296	4.91554	100.253		23.4	201.4	10.1	72	477.6	104	167.7	261.7	39.1	12.9	14.1	16.6	60.2	15.9	56	98.7	14.7	46.7	2.5	8.9	15.7	29.7771	294.361	15.4919	105.921	533.24	113.734	198.323	353.504	49.6551	18.454	18.9537	20.7796	74.9346	17.1279
	12ZA07	56.0505	0.68576	20.8911	4.70937	0.08068	1.9028	1.29156	1.2103	4.88125	0.18743	7.90344	99.7942		14	33.3	13	76	724.1	242.9	157.1	275.8	51.9	19.8	28.2	32.1	79.2	38.7	38.7	101.9	34.2	44.4	10.2	24.8	11.1	17.8154	48.6704	19.9401	111.805	808.457	265.635	185.788	372.551	65.9105	28.3247	37.9074	40.1823	98.585	41.6886
	12ZA23	50.8956	0.2097	26.3279	2.78014	0.024	2.20886	0.42513	0.2072	7.95432	0.03665	7.91425	98.9837		6.1	3.5	14.8	7.8	758	370.1	58.4	412.4	66	29	37.3	7	38.4	34.7	97.7	183.4	51.7	77.8	12.5	36.6	0	7.76241	5.11551	22.7011	11.4748	846.306	404.741	69.0642	557.07	83.8168	41.4857	50.1399	8.7625	47.7988	37.3797
	14ZA116A	48.5154	0.37437	26.4617	2.09534	0.0505	1.77197	2.24245	0.41482	7.52953	0.05673	9.20575	98.7186		6.5	5.8	18.9	19.7	1170	324.8	108.6	466.5	63.2	28.7	32.4	7.1	28.3	34.9	49.7	55.2	55.3	31.2	12.9	15.9	1	8.27142	8.47713	28.9899	28.9811	1306.3	355.201	128.431	630.148	80.2609	41.0566	43.5532	8.88768	35.2267	37.5951
	12ZA22A	53.4238	0.61538	21.7075	6.2411	0.05944	2.48104	0.96969	1.55918	5.35425	0.13524	7.34824	99.8949		12.1	20.2	11.8	60	758.6	255.6	183.5	131.7	27.1	16.8	29.3	21.5	108.8	40.7	33.8	63.7	26.6	30.5	8.5	22.2	2.6	15.3976	29.5238	18.0995	88.2674	846.976	279.524	217.008	177.9	34.4157	24.0331	39.3861	26.9134	135.43	43.843
	12ZA22B	52.5596	0.25961	23.0515	3.40349	0.23417	2.1621	2.05852	0.34834	7.15342	0.05234	8.24829	99.5313		4	8.9	17.6	13.2	854.3	365.9	89.8	391.6	57.2	30.4	34.7	7.4	103.7	39.4	79.9	154.4	39.2	69.4	12.2	26.9	2.6	5.0901	13.008	26.9959	19.4188	953.825	400.148	106.198	528.973	72.6412	43.4885	46.6449	9.26322	129.082	42.4426
	13ZA78A	50.425	0.45094	13.7247	2.25157	0.23804	1.03827	13.6799	2.56986	2.77039	0.13506	12.7915	100.075		15.4	31.1	9	60.1	612.2	124.1	303.1	163.7	27.6	10.4	17.7	9.3	55.1	17.1	31.7	57.3	13.2	28.9	2.7	7.4	12.9	19.5969	45.455	13.8047	88.4146	683.521	135.716	358.448	221.126	35.0506	14.8776	23.7929	11.6416	68.5863	18.4205
	12ZA08	22.15	0.36129	11.7966	1.18752	0.53122	1.04351	30.8926	0.06041	3.57669	0.02341	27.6807	99.3039		3.9	3.9	6.6	16.3	406.5	170.3	1215	426.3	98.3	21.1	13.4	6	21.7	32.3	15.7	33.4	35	20.9	8.8	13.7	0	4.96285	5.70014	10.1234	23.9793	453.857	186.24	1436.87	575.846	124.836	30.1845	18.0127	7.51072	27.0113	34.7943
	14ZA121	44.7001	0.323483	23.0389	2.73268	0.243728	1.79537	7.09598	0.330195	6.82357	0.0912384	11.4293	98.6045		9.108	8.613	13.86	19.206	970.398	296.802	191.763	411.543	62.667	30.492	27.423	10.098	47.817	40.194	125.037	99.594	49.896	51.183	13.266	2478.96	0.247896	11.5902	12.5885	21.2592	28.2544	1083.45	324.583	226.78	555.912	79.584	43.6201	36.8629	12.6405	59.5207	43.2979
	14ZA141	14.4258	0.16351	5.64639	1.67635	0.54649	1.40067	39.8098	0.34626	1.16462	0.16383	33.9023	99.246		8.7	14	2	36.2	917.4	60.4	558.8	61.3	25.5	3.8	11	14.6	31.1	16.8	27.6	47.6	4.9	24	0.9	5.8	0	11.071	20.462	3.06771	53.2547	1024.28	66.0534	660.841	82.8041	32.3838	5.43606	14.7866	18.2761	38.7121	18.0974
	12ZA54	47.5452	0.69672	26.4435	4.3694	0.10862	2.03515	2.08517	0.3913	6.7365	0.30494	8.89271	99.6093		13.1	18.1	10.5	53.8	1079.5	274.9	69.3	272.2	33	20.3	31.4	25.4	101.1	23.8	30.7	74.5	49.7	36.7	10.9	27.8	7.7	16.6701	26.4545	16.1055	79.1465	1205.26	300.631	81.9546	367.688	41.9084	29.04	42.209	31.7954	125.845	25.6379
	12ZA61	52.7488	0.69644	18.6193	8.51777	0.30738	1.39457	1.49884	1.05442	2.63535	0.2247	11.5535	99.251		23.7	60.2	18	107	585.9	149.1	88.1	207.9	54.9	13.3	24.5	24.6	88	50.7	50.5	98	18.7	50.4	5.1	38.7	239	30.1589	87.9868	27.6094	157.41	654.157	163.056	104.188	280.831	69.7203	19.0262	32.9337	30.7939	109.539	54.6152
	09LGV-04	49.9266	0.721674	24.9327	4.73423	0.0681666	2.21862	1.2916	1.26994	6.23922	0.305995	6.96997	98.6786		16.2972	22.4338	7.7462	65.6918	1004.59	279.97	189.53	215.385	24.8482	19.114	34.6064	20.5224	80.3794	30.8842	76.959	145.669	51.5072	51.1048	10.3618	23.2386		20.7386	32.7887	11.8816	96.6408	1121.63	306.175	224.14	290.942	31.556	27.3434	46.5191	25.6897	100.674	33.2692
	12ZA10	47.9207	0.26857	24.9955	2.74232	0.13803	1.96243	3.67438	0.83398	6.78745	0.07673	9.76674	99.1669		7.2	5.9	13.3	14	1507	294.4	144.6	359.2	55.8	30.7	29.3	12.7	61	66.7	28.6	55	60.2	25.5	14.8	20.5	3.3	9.16219	8.62329	20.4003	20.5957	1682.56	321.956	171.005	485.207	70.8633	43.9177	39.3861	15.8977	75.9304	71.8508
	09LGV-01	58.2563	0.413526	22.3588	1.96622	0.0163777	1.56077	1.4439	0.659383	6.1977	0.189561	6.26134	99.3239		5.1306	3.3198	5.9354	20.2206	849.567	234.297	62.372	293.048	30.4818	22.0314	26.2566	11.6696	39.0328	23.138	64.7864	119.312	39.6364	43.9622	11.569	15.09		6.52882	4.85213	9.10404	29.747	948.541	256.228	73.7615	395.849	38.7104	31.5169	35.295	14.6078	48.888	24.9248
	13ZA79	73.1651	0.48289	14.5746	1.6723	0.01076	0.66526	0.68372	3.76522	2.09971	0.1238	3.1014	100.345		7	26.4	8.3	48.5	373.6	84.2	148.9	157.7	22.4	9.7	15	10.1	23.2	14.6	25.1	62.5	12.5	25.6	2.9	2	5.2	8.90768	38.5856	12.731	71.3495	417.124	92.0811	176.09	213.021	28.4469	13.8763	20.1635	12.643	28.8784	15.7275
	09TBT-04	35.2194	0.417128	19.8567	2.05737	0.618368	1.06306	16.3875	0.161262	5.1666	0.0603801	17.6482	98.6561		4.024	1.8108	12.9774	8.3498	861.136	221.219	178.766	543.139	95.4694	22.2326	20.8242	7.042	25.8542	45.6724	95.6706	231.682	58.2474	112.169	14.9894	6.539		5.12064	2.64662	19.9055	12.2836	961.458	241.926	211.41	733.673	121.241	31.8047	27.9926	8.81508	32.382	49.1994
	09LGV-02	51.6899	0.656153	25.5922	3.60365	0.0215385	1.93114	0.701584	1.23775	6.82261	0.156976	7.02488	99.4384		7.7462	9.557	8.551	57.4426	887.191	291.539	96.3748	199.792	28.9728	16.096	29.677	23.9428	62.5732	19.5164	57.1408	116.495	54.2234	52.5132	9.8588	23.641		9.85724	13.9683	13.116	84.5052	990.548	318.827	113.973	269.879	36.794	23.026	39.8928	29.9713	78.372	21.0235
	14ZA154	58.8898	0.68339	18.575	6.26227	0.02605	1.56047	0.38654	0.37657	3.92907	0.16173	9.05785	99.9087		10.4	38.7	14.6	80.2	442.4	228.3	51.8	283.1	63.5	16.4	23.5	20.4	57.9	36.9	267.3	325.2	42.1	147.2	17.5	101.7	14.6	13.2343	56.5629	22.3943	117.984	493.939	249.669	61.259	382.412	80.6419	23.4609	31.5895	25.5364	72.0716	39.7496
	14ZA154	61.1195	0.61971	17.0207	6.3542	0.0301653	1.46311	0.386922	0.563963	3.82301	0.155925	7.48921	99.0264		14.157	38.709	13.761	80.586	471.24	217.305	53.262	231.165	49.302	15.444	22.77	26.928	64.746	47.025	179.685	228.789	33.462	102.267	13.662	1904.27	0.190426	18.0152	56.5761	21.1074	118.552	526.139	237.645	62.988	312.258	62.6111	22.0933	30.6082	33.7081	80.5933	50.6564
	09TBT-01	44.038	0.36886	23.6922	2.15946	0.0796752	1.44694	9.22899	0.920088	5.26064	0.108447	13.0108	100.314		10.4624	5.4324	11.569	43.9622	443.143	162.771	156.332	173.535	27.3632	6.539	24.4458	7.4444	47.0808	81.1842	13.078	19.3152	37.5238	8.551	8.8528	12.072		13.3137	7.93985	17.7452	64.6738	494.769	178.006	184.88	234.411	34.7499	9.35432	32.8609	9.3188	58.968	87.4536
	14ZA142	71.4257	0.27167	13.0133	3.54936	0.07086	0.4369	1.14923	4.18151	1.09148	1.03279	3.88754	100.11		3.6	17.1	7.2	45.5	237.8	57.9	423.6	157.7	24.8	10.3	12.5	10	42.3	68.9	30.8	55.3	16.3	23.7	3.2	7.8	21.3	4.58109	24.9929	11.0438	66.9361	265.504	63.3194	500.952	213.021	31.4948	14.7346	16.8029	12.5179	52.6534	74.2207
	14ZA142 R	71.8311	0.27283	13.1321	3.58294	0.07165	0.4329	1.153	4.2238	1.09118	1.04037	3.89	100.722		4.1	17	7.9	45.8	238.1	58.7	428.5	158.9	26.2	10.8	12	10	42.3	69.5	28	56.1	17.5	25.3	2.9	5.1	20	5.21736	24.8468	12.1175	67.3775	265.838	64.1943	506.747	214.642	33.2727	15.4499	16.1308	12.5179	52.6534	74.8671
	14ZA142	71.4257	0.27167	13.0133	3.54936	0.07086	0.4369	1.14923	4.18151	1.09148	1.03279	3.88754	100.11		3.6	17.1	7.2	45.5	237.8	57.9	423.6	157.7	24.8	10.3	12.5	10	42.3	68.9	30.8	55.3	16.3	23.7	3.2	7.8	21.3	4.58109	24.9929	11.0438	66.9361	265.504	63.3194	500.952	213.021	31.4948	14.7346	16.8029	12.5179	52.6534	74.2207
	14ZA142	69.5745	0.287268	13.2215	4.03078	0.0539055	0.525076	1.64508	3.66142	1.3541	1.36368	4.3082	100.025		5.643	18.81	9.504	50.49	256.707	71.181	365.607	171.27	33.462	10.395	13.266	11.88	45.639	70.092	26.829	65.043	17.028	31.086	3.861	1277.79	0.127779	7.18086	27.4922	14.5778	74.2771	286.613	77.8435	432.369	231.352	42.4951	14.8705	17.8326	14.8712	56.8096	75.5048
	09LGC-04	50.5231	0.48959	24.5565	3.22573	0.125317	1.64336	2.59607	1.68718	6.31837	0.291157	7.21785	98.6743		8.7522	7.6456	6.8408	52.815	1076.92	266.691	143.556	199.691	14.4864	14.2852	36.5178	16.1966	67.905	37.4232	30.7836	65.39	48.791	24.144	8.1486	16.2972		11.1374	11.1746	10.4928	77.6974	1202.38	291.653	169.771	269.743	18.397	20.4356	49.0885	20.2747	85.05	40.3132
	09LGC-01	53.6903	0.481864	26.8005	1.93856	0.0297977	1.28921	0.447036	2.0478	6.25276	0.198031	5.55277	98.7287		5.8348	4.9294	13.7822	44.3646	1016.66	237.517	77.5626	422.118	90.3388	23.0374	40.0388	10.563	38.0268	19.9188	46.0748	124.945	44.0628	75.45	11.8708	14.1846		7.42493	7.20468	21.1399	65.2658	1135.1	259.748	91.7261	570.197	114.726	32.956	53.8215	13.2226	47.628	21.457
	12ZA55	57.5557	0.43088	23.6973	2.06391	0.07664	1.46503	1.27106	0.21082	6.04878	0.18399	6.87602	99.8801		5.7	5.5	5.9	21.5	872.5	226.2	52.9	283.3	35.8	23.4	26.3	15.9	54.1	11.3	43.6	90.1	41.1	43.3	8.4	19.6	0	7.2534	8.03866	9.04975	31.6292	974.146	247.372	62.5599	382.682	45.4642	33.4747	35.3534	19.9034	67.3415	12.1726
	12ZA19	46.7618	0.54299	29.7692	0.87626	0.0442	0.54727	2.83526	0.86978	5.16822	0.68599	9.32954	97.4305		1.1	3.6	12.3	35.9	872.3	253	257	418.2	85.7	36.4	29.8	17.9	19.7	34.2	131.8	253.6	59.2	102.1	17.5	19.1	1.7	1.39978	5.26167	18.8664	52.8134	973.922	276.681	303.93	564.905	108.835	52.0718	40.0582	22.407	24.5218	36.8411
[truncated: 33 more columns]

## Sheet: Table 2. Zircon U-Pb & REE
Spot Name	7-corr %com 206	7-corr %com 208	ppm U	ppm Th	207corr 206Pb /238U Age	1s err	208corr 206Pb /238U Age	1s err	204corr 207Pb /206Pb Age	1s err	% Dis- cor- dant	Total 238 /206	% err	Total 207 /206	% err	4corr 238 /206*	% err	4corr 207* /206*	% err	4corr 207* /235	% err	4corr 206* /238	% err	err corr	Y (ppm)	La (ppm)	Ce (ppm)	Nd (ppm)	Sm (ppm)	Eu (ppm)	Gd (ppm)	Tb (ppm)	Dy (ppm)	Ho (ppm)	Er (ppm)	Yb (ppm)	Lu (ppm)	Hf (ppm)	Eu (star)		La (ch)	Ce (ch)	Nd (ch)	Sm (ch)	Eu (ch)	Gd (ch)	Tb (ch)	Dy (ch)	Er (ch)
14ZA168-15.1	0.0320536	0.203198	193.979	191.15	251.767	2.6753	250.679	3.51949	263.249	83.9185	4.41645	25.0999	1.05004	0.0515219	3.65539	25.0999	1.05004	0.0515219	3.65539	0.283023	3.80322	0.0398409	1.05004	0.276091	860.383	0.050947	33.7179	0.906344	2.46308	0.756165	21.416	7.30294	84.127		147.735	270.713	463.631	11298.2	0.317364	50.045	0.214966	55.0048	1.98325	16.6424	13.431	107.618	202.298	341.98	923.347
14ZA168-16.1	0.372976	1.29337	113.095	202.309	253.976	2.95802	251.678	4.66414	-700.043	615.26	138.276	24.7925	1.14449	0.0543024	4.19491	25.3882	1.46119	0.0351238	22.1572	0.190753	22.2053	0.0393884	1.46119	0.0658036	1258.53	0.186242	28.965	4.66367	8.18409	3.27876	47.3784	13.994	139.589		204.036	340.059	569.978	7459.97	0.507554	8.59833	0.785833	47.2512	10.205	55.2979	58.2372	238.083	387.644	567.437	1275.23
14ZA168-2.1	0.184448	1.6374	125.64	88.8221	255.573	2.97514	255.362	3.41516	418.73	131.837	39.449	24.681	1.1471	0.0528278	4.1262	24.6083	1.18679	0.0551844	5.90328	0.309197	6.0214	0.0406367	1.18679	0.197095	789.791	0.0446776	19.727	1.54205	2.9951	1.25451	21.4022	6.98006	78.8436		137.483	268.726	483.26	8717.98	0.477625	18.065	0.188513	32.1811	3.3743	20.2372	22.2826	107.549	193.354	320.503	859.269
14ZA168-18.1	0.0646761	0.76489	277.088	147.746	256.766	2.62001	256.543	2.86398	226.855	86.8866	-13.3562	24.5935	1.01656	0.0518949	2.87818	24.6298	1.0272	0.0507142	3.75983	0.283903	3.89762	0.0406012	1.0272	0.263545	668.702	0.0214796	21.3573	0.8909	2.46915	0.710934	17.8462	5.78276	65.6693		116.4	243.167	439.222	9748.63	0.326461	34.156	0.0906313	34.8406	1.94945	16.6834	12.6276	89.6795	160.187	266.948	727.498
14ZA168-14.1	0.0165482	0.133606	283.314	222.323	257.313	3.82566	256.926	4.51567	312.717	81.6395	17.9434	24.5521	1.49443	0.0515215	2.8931	24.5176	1.50149	0.0526492	3.58782	0.296084	3.88934	0.0407871	1.50149	0.386052	909.461	0.101449	52.7299	0.596621	1.7872	1.01465	16.3055	5.94279	71.9052		160.901	361.808	676.759	10625.9	0.572941	99.2396	0.428055	86.0194	1.30552	12.0757	18.0221	81.9369	164.62	292.298	1005.63
14ZA168-3.1	8.47733	60.142	328.467	140.075	257.002	15.4716	258.381	18.2431	-309.087	659.286	185.733	22.5022	6.09095	0.119308	1.75719	24.915	6.21945	0.0406744	25.7476	0.225093	26.4882	0.0401365	6.21945	0.234801	687.486	5.19465	33.3887	6.5042	3.71106	0.898787	15.1655	5.14821	63.6233		130.274	276.327	496.924	12108.6	0.365198	3.01337	21.9184	54.4677	14.2324	25.0747	15.9642	76.2085	142.61	258.631	814.21
14ZA168-6.1	0.484998	5.81671	123.166	66.3748	260.076	3.22044	261.493	3.55461	621.441	157.994	58.8534	24.1722	1.21911	0.0553376	4.25909	24.015	1.30837	0.0605246	7.3236	0.347496	7.43955	0.0416406	1.30837	0.175867	339.974	0.207456	17.7829	0.281861	0.843626	0.27941	6.69461	2.51592	32.0185		58.9323	119.56	221.404	11541	0.358388	38.8841	0.875343	29.0096	0.616764	5.70018	4.96288	33.6413	69.693	130.156	368.327
14ZA168-19.1	0.240854	1.28024	324.237	395.936	260.809	3.8472	262.125	4.86055	416.929	75.9985	37.9202	24.1621	1.48463	0.0533975	2.55334	24.1094	1.49343	0.0551399	3.40193	0.315341	3.7153	0.0414776	1.49343	0.401967	2108.03	0.263694	48.5284	4.6112	6.77273	4.49354	59.5584	19.8911	215.424		365.458	690.169	1178.38	8436.27	0.682	14.1332	1.11263	79.1654	10.0902	45.7617	79.8143	299.288	550.999	875.708	2284.12
14ZA168-21.1	0.228547	4.72427	135.171	44.5596	261.731	4.9986	263.133	5.23052	443.722	135.367	41.5337	24.0781	1.91449	0.0533196	4.20023	24.0032	1.94126	0.0558068	6.08776	0.320567	6.38978	0.0416611	1.94126	0.303807	169.799	0.00754252	14.1472	0.0698897	0.203372	0.12862	2.42414	0.975159	13.1021		31.0016	80.2906	160.083	12535.1	0.558384	249.828	0.031825	23.0787	0.152932	1.37413	2.28455	12.1816	27.0127	53.2605	193.76
14ZA168-25.1	0.237491	5.10773	845.579	263.904	262.39	3.29447	263.583	3.4207	242.088	79.0068	-8.49697	24.0143	1.25891	0.0534062	2.73233	24.085	1.26459	0.0510501	3.42831	0.292247	3.65411	0.0415196	1.26459	0.346072	700.372	1.58783	33.1519	2.95558	2.40644	0.574771	12.1152	4.76352	56.967		127.077	303.024	588.547	12212.8	0.324482	8.21466	6.6997	54.0814	6.46735	16.2598	10.2091	60.8805	131.953	231.573	794.23
14ZA168-8.1	3.87675	40.0461	572.375	225.855	264.437	5.94109	264.744	6.65135	463.833	184.988	43.536	22.9554	2.25583	0.0826251	2.84988	23.7393	2.3116	0.0563147	8.34836	0.327081	8.66248	0.0421243	2.3116	0.266852	1946.9	16.6239	44.2765	18.9552	11.6168	2.14265	53.4564	18.3303	206.573		346.441	609.067	1032.68	10723.2	0.262094	1.29419	70.1429	72.2292	41.4774	78.4916	38.0576	268.625	507.764	839.727	2165.25
14ZA168-1.1	0.219587	3.05281	527.48	237.096	265.548	4.32662	265.59	4.63964	340.435	46.0983	22.2859	23.7271	1.6455	0.0533339	2.01449	23.7283	1.64561	0.053296	2.03591	0.309692	2.61782	0.0421439	1.64561	0.628621	1166.39	1.97077	22.5156	1.29296	2.66226	0.280517	26.2753	9.68078	118.732		207.045	351.535	578.315	11796.6	0.102237	6.59149	8.31549	36.7302	2.82924	17.9882	4.98254	132.037	268.166	482.651	1294.03
14ZA168-20.1	0.349053	4.27006	791.091	389.835	265.606	3.55202	265.115	3.85233	286.534	78.9728	7.40029	23.691	1.34161	0.0543731	2.8027	23.7599	1.34681	0.0520482	3.4544	0.302038	3.70767	0.0420876	1.34681	0.36325	780.847	1.78548	41.7827	1.30173	2.01659	0.557894	15.418	5.40819	67.5988		140.887	325.409	611.798	11287.8	0.304984	13.1305	7.53368	68.161	2.84843	13.6256	9.9093	77.4774	149.811	274.792	880.541
14ZA168-29.1	-0.256425	-2.31517	576.983	406.552	266.712	3.34459	265.759	3.75291	319.128	73.1539	16.6418	23.7341	1.26447	0.0495439	2.04731	23.638	1.27594	0.0527978	3.21859	0.307968	3.46227	0.0423047	1.27594	0.368526	800.762	0.0305555	49.4219	1.3526	3.0013	1.11004	21.1002	7.16866	77.5114		137.884	275.511	482.354	10800.9	0.425196	52.2056	0.128926	80.623	2.95974	20.279	19.7165	106.031	198.578	315.087	861.773
14ZA168-24.1	-0.089936	-0.771243	222.992	166.737	266.753	3.94829	266.485	4.50278	296.248	95.3443	10.0882	23.691	1.48572	0.0508796	3.24321	23.6499	1.49646	0.05227	4.17779	0.304737	4.43772	0.0422835	1.49646	0.337215	661.828	0.220004	32.7393	1.27187	2.76544	1.30188	18.7718	5.87257	62.4658		111.503	229.792	411.559	9296.73	0.550786	28.7809	0.928286	53.4083	2.78308	18.6854	23.1239	94.3307	162.675	253.926	696.892
14ZA168-10.1	-0.0493677	-5.10835	594.698	43.7542	270.761	4.81874	271.111	4.7894	208.783	98.5771	-30.0914	23.3235	1.78609	0.051295	3.94295	23.3519	1.78816	0.0503198	4.2517	0.297111	4.61243	0.0428231	1.78816	0.387682	786.283	0.325628	7.79821	0.834265	0.949551	0.226361	9.33138	4.45814	61.7796		164.405	485.743	911.536	13815.7	0.231803	7.95215	1.37396	12.7214	1.82552	6.41588	4.02063	46.8913	123.494	251.136	1027.53
14ZA168-17.1	0.0710176	0.433244	235.713	241.384	271.226	4.45683	270.015	5.38515	296.284	69.4985	8.57139	23.2547	1.65361	0.0522709	3.0453	23.2547	1.65361	0.0522709	3.0453	0.309921	3.4653	0.0430021	1.65361	0.47719	1516.41	0.117937	17.871	4.72614	8.66905	1.97926	53.2252	16.2928	168.113		256.602	420.448	716.988	8850.88	0.280871	5.37922	0.497625	29.1534	10.3417	58.5747	35.1556	267.463	451.324	683.387	1603.76
14ZA168-22.1	-0.0139373	-0.117662	261.829	191.498	275.893	2.89822	274.457	3.48074	148.221	117.96	-87.3505	22.8724	1.04661	0.051695	3.05421	22.9484	1.07266	0.0490295	5.0315	0.294583	5.14457	0.0435761	1.07266	0.208503	881.236	0.0359823	23.1271	1.56758	3.06894	1.32443	21.3902	7.51936	84.3064		151.563	308.181	562.109	10162.8	0.498285	21.0652	0.151824	37.7277	3.43016	20.7361	23.5246	107.489	208.293	342.709	947.268
14ZA168-4.1	0.107087	1.3558	428.159	214.318	277.523	2.57579	277.498	2.92501	371.809	62.8994	25.7035	22.7076	0.929914	0.0527027	2.18842	22.6697	0.937887	0.0540417	2.79338	0.328689	2.94662	0.0441117	0.937887	0.318292	1091.09	0.283083	16.8789	1.39483	3.17663	0.744508	27.5664	9.46162	109.468		191.906	336.481	575.465	10102.7	0.242519	12.968	1.19445	27.5348	3.05213	21.4637	13.2239	138.525	262.095	444.993	1199.41
14ZA168-7.1	-0.174932	-2.08844	213.194	108.645	319.286	3.25291	317.143	3.54825	306.913	83.2198	-4.09515	19.7286	1.01718	0.0513948	2.98434	19.7012	1.02727	0.0525151	3.65349	0.36753	3.79516	0.0507583	1.02727	0.270679	1432.53	0.0597458	6.2043	2.61688	6.03412	1.37862	46.007	15.3177	162.28		245.849	379.597	616.232	7793.21	0.252217	3.38597	0.252092	10.1212	5.72622	40.7711	24.487	231.191	424.313	659.675	1536.55
14ZA168-27.1	-0.102649	-1.46214	386.295	166.713	330.082	3.1598	328.598	3.48163	318.937	53.8004	-3.55122	19.0535	0.963279	0.0522272	2.09516	19.0401	0.966206	0.0527934	2.367	0.382305	2.55661	0.0525206	0.966206	0.377925	781.909	0.0314687	18.5415	1.04237	2.3035	0.392781	21.4173	7.32642	82.4022		137.52	238.028	383.795	10205.2	0.17046	25.0633	0.13278	30.2472	2.28089	15.5642	6.97658	107.625	202.948	334.968	859.5
14ZA168-23.1	0.00330242	0.0772892	521.05	139.403	375.024	5.76401	374.483	5.94246	352.736	45.3842	-6.43411	16.6936	1.56053	0.0541456	1.74623	16.7052	1.56183	0.0535867	2.00874	0.44229	2.54448	0.0598617	1.56183	0.613811	758.866	0.00777167	16.6818	0.16238	0.942433	0.114247	10.7255	4.48555	63.5526		147.158	316.377	576.539	11936.8	0.109537	140.236	0.0327918	27.2134	0.355317	6.36779	2.02925	53.8968	124.254	258.344	919.738
14ZA168-9.1	-0.244962	-6.92382	199.976	50.0572	465.713	13.968	465.969	14.2732	419.098	62.7931	-11.3691	13.3808	3.0609	0.054376	2.3982	13.3673	3.06266	0.0551935	2.81188	0.569306	4.15771	0.0748095	3.06266	0.736622	722.858	0.016674	8.27057	0.209972	1.09701	0.321785	11.3234	5.00411	61.0118		133.079	288.549	555.263	10840.3	0.278305	50.9311	0.0703544	13.492	0.459458	7.41223	5.71554	56.9014	138.618	248.016	831.743
14ZA168-5.1	0.0248432	0.276871	204.1	113.826	485.197	6.68253	482.975	7.24604	460.3	61.2679	-5.53244	12.7893	1.39934	0.057063	2.28938	12.8025	1.40314	0.056225	2.76329	0.605532	3.09912	0.0781099	1.40314	0.452754	2465.14	0.115451	6.7993	1.79822	6.42626	0.747505	64.9686	22.2016	254.323		417.326	675.036	1099.68	11329.1	0.111515	5.01669	0.487135	11.0918	3.93484	43.4207	13.2772	326.475	615.004	1033.83	2608.29
14ZA168-13.1	0.766307	14.9746	333.323	96.5259	822.6	9.34449	821.73	9.56412	858.549	46.3814	4.32582	7.29097	1.1691	0.0728868	1.2089	7.33698	1.17846	0.0677022	2.23429	1.27229	2.52603	0.136296	1.17846	0.466527	1267.31	6.33449	29.762	8.60252	7.70823	1.2244	42.9349	14.5128	146.502		206.168	309.804	502.63	10838.1	0.205158	2.13171	26.7278	48.5515	18.8239	52.0826	21.7477	215.753	402.016	595.535	1288.55
14ZA168-26.1	0.423275	7.09837	170.899	71.1505	1066.97	23.3684	1071.45	23.4817	1159.41	107.162	8.2611	5.53208	2.21516	0.0785283	5.40392	5.53208	2.21516	0.0785283	5.40392	1.95722	5.84032	0.180764	2.21516	0.379287	1572.49	0.0247067	3.77426	1.70213	5.49505	0.275474	46.4669	15.8786	170.906		266.536	414.417	668.844	10083.4	0.0525499	3.21615	0.104248	6.15703	3.72458	37.1287	4.89297	233.502	439.851	694.739	1665.85
14ZA168-11.1	-0.849103	-62.0271	266.209	27.0724	1097.8	86.1054	1090.22	82.723	897.219	26.4903	-23.2748	5.43204	8.13997	0.0689973	1.27921	5.43216	8.13998	0.0689792	1.28387	1.75084	8.2406	0.184089	8.13998	0.987789	2656.36	0.0159881	0.618512	0.373896	2.4195	0.0965483	40.533	18.8805	254.22		422.101	639.648	959.928	13827.5	0.0297184	2.27863	0.0674603	1.00899	0.818154	16.348	1.71489	203.683	523.004	1033.42	2638.13
14ZA168-28.1	-0.154498	-3.03072	704.248	247.958	1248.69	10.5116	1245.4	10.3914	1221.41	14.5362	-2.31958	4.68592	0.871213	0.0808586	0.724318	4.68495	0.871343	0.0810339	0.739655	2.38486	1.14295	0.213449	0.871343	0.762365	966.041	0.504842	18.4707	1.03355	1.67983	0.26035	14.2956	6.29223	78.7384		180.177	402.606	700.88	12726.1	0.161947	13.722	2.13014	30.1317	2.2616	11.3502	4.62434	71.8371	174.3	320.075	1126.1
14ZA168-12.1	0.620554	8.106	1098.3	581.358	1331.21	24.0977	1335.36	24.6556	1419.39	29.7858	6.43256	4.33267	1.87118	0.0910129	1.50794	4.33913	1.87142	0.0897503	1.55831	2.8519	2.43528	0.230461	1.87142	0.768465	2363.67	23.9531	134.803	19.5795	12.9851	3.78866	53.3356	17.9127	202.387		428.158	869.538	1534.99	12011.1	0.438837	3.05615	101.068	219.908	42.8436	87.7372	67.2941	268.018	496.197	822.712	2675.99
14ZA168-30.1	0.942353	13.6841	439.72	203.228	1619.74	24.2517	1623.45	23.6981	1657.11	18.322	2.3205	3.46782	1.54105	0.107957	0.57876	3.49259	1.54375	0.10184	0.989187	4.02041	1.83348	0.28632	1.54375	0.841977	1263.85	1.17724	24.2589	2.75162	3.99333	0.301909	30.0217	10.7731	127.657		229.641	395.085	655.222	9099.73	0.0840503	7.20295	4.96724	39.5741	6.02105	26.982	5.3625	150.863	298.423	518.933	1435.25
Spot Name	7-corr %com 206	7-corr %com 208	ppm U	ppm Th	207corr 206Pb /238U Age	1s err	208corr 206Pb /238U Age	1s err	204corr 207Pb /206Pb Age	1s err	% Dis- cor- dant	Total 238 /206	% err	Total 207 /206	% err	4corr 238 /206*	% err	4corr 207* /206*	% err	4corr 207* /235	% err	4corr 206* /238	% err	err corr	Y (ppm)	La (ppm)	Ce (ppm)	Nd (ppm)	Sm (ppm)	Eu (ppm)	Gd (ppm)	Tb (ppm)	Dy (ppm)		Er (ppm)	Yb (ppm)	Lu (ppm)	Hf (ppm)	Eu (star)		La (ch)	Ce (ch)	Nd (ch)	Sm (ch)	Eu (ch)	Gd (ch)	Tb (ch)	Dy (ch)	Er (ch)
14ZA161-25.1	14.1092	34.9249	589.175	1608.76	219.039	6.43532	263.984	14.3759	992.946	697.281	78.6652	24.8511	2.02725	0.16335	9.1283	28.1467	3.09091	0.0722798	34.2978	0.354071	34.4368	0.0355281	3.09091	0.0897562	2586.29	53.3844	304.883	47.9478	29.521	10.6237	114.633	31.9524	300.112		394.094	591.311	941.866	8085.94	0.556676	3.01278	225.25	497.363	104.919	199.466	188.698	576.048	885.109	1219.97	2463.09
14ZA161-24.1	6.67464	39.5532	1013.3	1077.65	248.155	3.10421	264.631	4.12633	352.321	201.353	29.9275	23.7799	1.2574	0.10464	1.08442	25.4045	1.38403	0.0535768	8.9114	0.290782	9.01823	0.0393631	1.38403	0.15347	1445.43	60.1046	395.207	73.6299	30.2832	6.49098	62.9805	16.4748	156.157		248.581	479.726	832.603	9878.83	0.45306	3.10912	253.606	644.709	161.116	204.617	115.293	316.485	456.365	634.784	1553.63
14ZA161-13.1	-0.0726628	-0.307141	197.061	290.019	250.422	2.60878	248.04	4.55154	290.337	103.212	13.9197	25.2638	1.03206	0.0506531	3.45273	25.2171	1.05081	0.0521349	4.51774	0.285059	4.63833	0.0396556	1.05081	0.226549	1513.94	0.26644	46.1271	4.48477	7.82849	3.92953	48.6325	14.3904	150.16		255.823	486.878	861.747	8075.93	0.613886	13.7594	1.12422	75.2481	9.81349	52.8952	69.7963	244.384	398.626	610.407	1598.89
14ZA161-9.1	-0.00853814	-0.0721901	192.434	143.7	253.404	3.92213	252.881	5.69453	241.249	81.63	-5.10256	24.9447	1.5528	0.0512332	3.34632	24.951	1.55443	0.0510315	3.5416	0.282002	3.86771	0.0400786	1.55443	0.4019	425.737	0.0761985	20.7565	0.750814	1.60568	0.611601	10.5861	3.44701	39.37		73.2742	160.315	306.538	9329.35	0.452189	34.4736	0.321513	33.8605	1.64292	10.8492	10.8633	53.1966	95.4851	160.04	457.964
14ZA161-7.1	-0.0147084	-0.154094	114.413	74.7199	257.23	3.00694	258.983	3.40916	-150.73	294.91	274.393	24.5678	1.15161	0.0512692	4.3031	24.8117	1.28643	0.0433119	11.8845	0.240686	11.9539	0.0403035	1.28643	0.107616	468.509	0.0896689	13.8379	0.545894	1.12919	0.701617	8.33118	3.10507	37.6811		84.9779	204.779	410.33	8121.28	0.697288	28.7043	0.37835	22.574	1.19452	7.62967	12.4621	41.8652	86.0131	153.175	531.112
14ZA161-2.1	0.0649734	0.679929	170.058	104.96	258.18	4.04408	258.534	4.76651	186.161	130.287	-39.194	24.4561	1.56888	0.051929	3.65296	24.5201	1.58931	0.0498322	5.5962	0.280214	5.8175	0.0407829	1.58931	0.273195	318.047	0.032232	22.5841	0.324827	0.882798	0.339615	8.76456	2.69878	31.2642		54.8689	106.154	184.289	9894.11	0.372169	87.0166	0.136	36.8419	0.71078	5.96485	6.03224	44.043	74.7583	127.09	342.93
14ZA161-15.1	0.206772	2.29658	169.315	88.7098	259.646	2.77934	257.855	3.05373	-130.033	261.336	303.839	24.2808	1.05879	0.0530982	3.5265	24.5669	1.17982	0.0436754	10.5741	0.245126	10.6397	0.0407052	1.17982	0.110888	241.605	0.235308	15.887	0.297897	0.606938	0.339992	5.03535	1.7427	20.7768		43.8066	105.373	212.965	9722.08	0.592831	31.5153	0.99286	25.9168	0.651853	4.10093	6.03893	25.3032	48.2744	84.4585	273.791
14ZA161-10.1	-0.0118859	-0.0655783	377.938	432.541	261.585	4.10485	260.667	5.08862	253.978	47.9081	-3.03433	24.1499	1.58441	0.0513893	2.03887	24.1522	1.58463	0.0513144	2.08333	0.292944	2.61751	0.0414041	1.58463	0.605398	788.305	0.0491512	76.5397	1.16653	2.84996	0.869239	22.0892	7.15473	79.337		136.627	276.575	466.923	10409.3	0.333948	90.4799	0.207389	124.861	2.55258	19.2565	15.4394	111.001	198.192	322.508	853.921
14ZA161-23.1	0.0630791	0.251695	551.477	860.191	261.788	3.58346	259.42	4.88518	252.735	85.467	-3.62936	24.1127	1.36881	0.0519947	3.42953	24.134	1.37134	0.0512867	3.71579	0.293006	3.96076	0.0414353	1.37134	0.346232	2997.81	0.345727	88.4807	9.35936	18.3341	4.79946	118.815	35.1929	350.428		478.507	744.954	1200.54	9399.03	0.313455	13.1585	1.45876	144.341	20.48	123.879	85.2479	597.061	974.874	1424.5	2990.67
14ZA161-28.1	0.314435	3.72655	480.784	250.885	261.848	4.37303	261.806	4.75753	338.913	58.2272	23.033	24.0464	1.68575	0.0540106	2.14433	24.069	1.68822	0.0532602	2.57088	0.305103	3.07563	0.0415472	1.68822	0.548901	596.073	0.0726367	22.8739	0.65466	1.46305	0.382696	12.7958	4.75385	55.3539		103.672	204.894	366.226	11042.7	0.269612	42.9151	0.306484	37.3147	1.43252	9.88549	6.79745	64.3006	131.686	225.016	647.949
14ZA161-14.1	-0.238154	-2.26017	431.333	303.724	261.916	3.83316	262.566	4.31876	67.9108	87.5429	-289.555	24.1734	1.47494	0.0495832	2.4569	24.2393	1.483	0.0473904	3.67869	0.26957	3.96636	0.0412553	1.483	0.373895	819.756	0.0403082	45.278	0.921085	2.58585	0.832505	20.6669	7.0173	79.4211		141.154	276.564	491.351	9264.55	0.347134	67.5911	0.170077	73.8629	2.0155	17.4719	14.7869	103.854	194.385	322.85	882.211
14ZA161-12.1	-0.305619	-2.69908	121.342	84.5034	262.586	3.40104	260.456	3.7331	-112.379	282.479	338.334	24.1266	1.23769	0.0490574	7.14582	24.2787	1.31553	0.043989	11.4688	0.249816	11.544	0.0411883	1.31553	0.113957	366.799	0.0295752	20.5279	0.640503	1.60383	0.471554	11.2341	3.61335	38.0332		60.4042	114.695	195.479	9597.96	0.338636	43.88	0.12479	33.4877	1.40154	10.8367	8.37574	56.4526	100.093	154.607	377.526
14ZA161-21.1	0.783486	8.96919	424.176	223.57	262.657	4.38601	263.218	4.76112	407.777	104.654	36.0435	23.8581	1.67075	0.0577885	3.66456	23.9443	1.68049	0.0549147	4.67714	0.316219	4.96988	0.0417636	1.68049	0.338135	1252.67	0.840398	9.31249	4.66231	9.32981	0.962464	62.5286	17.4757	161.944		191.041	277.016	429.252	9293.5	0.121467	2.21002	3.54598	15.1917	10.202	63.0393	17.0953	314.214	484.091	658.31	1194.01
14ZA161-30.1	-0.0702224	-0.872862	234.887	118.594	263.842	2.70171	263.166	2.95226	-62.2805	193.654	530.948	23.9531	1.0126	0.0509723	3.55689	24.1345	1.08109	0.0448974	7.93893	0.256498	8.0122	0.0414345	1.08109	0.134931	393.874	0.0741919	22.2581	0.367392	1.10151	0.293274	9.31342	3.28392	37.9177		69.8443	140.866	244.279	11203.3	0.279109	65.0155	0.313046	36.31	0.80392	7.44261	5.20912	46.8011	90.9672	154.137	436.527
14ZA161-11.1	-0.422315	-5.39645	364.367	187.219	265.398	3.96537	264.813	4.23837	181.229	109.509	-47.0699	23.8935	1.49257	0.0481846	4.23792	23.8478	1.49934	0.0497268	4.69948	0.287504	4.93286	0.0419327	1.49934	0.30395	405.405	0.00279456	31.3509	0.534691	1.40114	0.733971	11.0825	3.46803	38.239		67.6409	139.07	249.3	10530.5	0.567764	86.5522	0.0117914	51.1434	1.17	9.46716	13.0368	55.6911	96.0672	155.443	422.756
14ZA161-26.1	-0.0472305	-1.03789	356.983	109.498	265.756	4.16571	266.258	4.34174	199.8	77.8225	-33.4556	23.7716	1.57957	0.0511996	2.61182	23.8034	1.58461	0.0501254	3.35104	0.290349	3.70682	0.0420108	1.58461	0.427486	565.704	0.103537	14.7553	0.503684	1.06891	0.464623	10.0973	3.82458	44.8787		104.091	246.307	493.934	8583.3	0.431099	31.2806	0.436863	24.0707	1.10215	7.22237	8.25263	50.74	105.944	182.434	650.567
14ZA161-6.1	-0.140024	-14.2903	1148.23	68.0513	267.356	2.25167	266.841	2.2426	202.543	35.7103	-32.4327	23.6482	0.848844	0.0504915	1.41019	23.6573	0.849654	0.0501846	1.53846	0.292487	1.75749	0.0422703	0.849654	0.483448	459.954	1.55372	17.5591	2.26644	0.924998	0.243856	4.92074	2.37129	33.1324		86.5536	230.364	461.845	14772.1	0.348414	4.97511	6.55576	28.6446	4.95938	6.24998	4.33136	24.7273	65.6868	134.685	540.96
14ZA161-20.1	0.27421	2.12273	289.685	224.196	267.426	4.08617	265.579	4.70749	173.277	121.394	-55.0738	23.5441	1.53804	0.0538142	2.65747	23.6694	1.56091	0.0495575	5.20189	0.288684	5.43103	0.0422486	1.56091	0.287406	821.634	0.856262	55.8343	1.04749	2.31611	0.781943	17.3562	6.36173	74.3406		142.909	302.706	535.954	9848.26	0.375939	30.8496	3.61292	91.0836	2.2921	15.6494	13.8889	87.2169	176.225	302.198	893.184
14ZA161-3.1	-0.0623211	-1.12377	791.134	281.093	273.723	4.4546	273.518	4.69211	250.374	37.4837	-9.45369	23.0688	1.64642	0.0512579	1.61754	23.0694	1.64647	0.0512341	1.62896	0.306213	2.31611	0.0433474	1.64647	0.710877	1097.11	0.091993	13.5253	0.551607	1.86678	0.337552	19.9635	7.64472	93.8353		195.857	396.419	718.06	9506.92	0.168548	27.6636	0.388156	22.0641	1.20702	12.6134	5.99559	100.319	211.765	381.444	1224.11
14ZA161-18.1	0.0209386	0.382552	353.362	128.787	274.293	4.46527	274.921	4.66134	237.75	105.415	-15.5822	23.0007	1.62889	0.0519385	4.08359	23.0289	1.63324	0.0509541	4.57062	0.305075	4.85366	0.0434237	1.63324	0.336496	537.854	0.0261989	15.2813	0.26028	0.868212	0.247399	9.59042	3.66697	45.9759		97.7062	211.201	389.542	11046.9	0.261345	73.3105	0.110544	24.9286	0.56954	5.86629	4.39429	48.193	101.578	186.894	610.664
14ZA161-16.1	-0.280061	-5.92305	90.0907	27.8125	274.966	3.53298	274.434	3.65684	-9.14522	234.35	3151.46	23.0123	1.26429	0.0495394	5.08609	23.1166	1.34319	0.0458912	9.70543	0.27372	9.79793	0.0432589	1.34319	0.137089	572.399	0.011875	1.49884	0.431143	1.18367	0.200069	12.5113	4.77845	57.4335		105.831	191.211	336.947	9327.2	0.158476	4.92205	0.0501053	2.44509	0.943419	7.99775	3.55362	62.8708	132.367	233.47	661.444
14ZA161-5.1	-0.131749	-1.78366	195.407	96.7342	281.641	4.78766	282.22	5.15601	293.497	95.2893	4.09596	22.4219	1.71137	0.0508798	3.25896	22.3848	1.72046	0.0522071	4.17333	0.321571	4.51405	0.0446731	1.72046	0.381135	343.996	0.00933618	14.2061	0.214059	0.529427	0.150062	6.1133	2.51815	30.8346		61.3713	119.571	213.788	11282.1	0.254261	91.2765	0.0393932	23.1748	0.4684	3.57721	2.66541	30.7201	69.7549	125.344	383.57
14ZA161-8.1	-0.511553	-5.99455	152.554	80.7165	356.764	6.70664	353.655	7.22878	28.7824	135.116	-1160.57	17.6636	1.90244	0.0495598	3.21195	17.7277	1.91967	0.0466204	5.63611	0.362597	5.95407	0.0564088	1.91967	0.322413	774.079	0.0135104	19.211	0.656226	1.64046	0.419829	17.7093	6.40997	77.9726		144.136	252.641	424.871	9451.78	0.237431	41.9831	0.057006	31.3393	1.43594	11.0842	7.457	88.9913	177.562	316.962	900.85
14ZA161-17.1	0.345283	9.77084	347.953	78.6583	450.354	4.21628	451.538	4.33847	468.788	66.0973	4.01573	13.7722	0.944358	0.0587712	2.05966	13.8119	0.95532	0.0564408	2.98548	0.56343	3.1346	0.0724011	0.95532	0.304766	3250.58	0.05606	1.3861	1.71801	5.25296	0.115958	57.9335	25.0414	310.902		558.449	892.752	1434.91	11929.2	0.0202621	1.13175	0.23654	2.26117	3.75933	35.493	2.05965	291.123	693.666	1263.83	3490.31
14ZA161-29.1	-0.346391	-34.4052	351.21	23.2104	613.264	5.67518	611.184	5.49171	520.49	62.6364	-18.3237	10.0543	0.930252	0.0574626	2.80495	10.0504	0.931243	0.0577804	2.85438	0.792682	3.00244	0.0994986	0.931243	0.310162	695.308	0.285869	1.14563	0.54239	2.24287	0.221103	22.2544	8.5047	85.4711		89.3151	124.919	188.752	12617.1	0.0953968	1.56193	1.2062	1.86889	1.18685	15.1545	3.92723	111.831	235.587	347.444	558.219
14ZA161-22.1	0.715307	13.736	43.2198	15.8678	906.93	23.6226	914.51	24.1663	1070.77	68.2998	15.8096	6.57232	2.67972	0.0752548	3.31297	6.57342	2.68054	0.0751174	3.39929	1.57562	4.32902	0.152128	2.68054	0.619202	233.796	0.0162905	5.09793	0.125287	0.401173	0.170441	4.20826	1.54393	20.884		42.5729	93.2743	182.504	11857.2	0.399859	48.508	0.0687365	8.31637	0.27415	2.71063	3.02738	21.147	42.7681	84.8945	266.081
14ZA161-27.1	0.205117	2.88173	667.678	335.207	1063.61	14.6052	1066.79	14.9044	1115.01	51.466	4.77943	5.56319	1.40519	0.0765717	2.57751	5.56171	1.40533	0.0767953	2.5784	1.90383	2.93651	0.179801	1.40533	0.47857	2633.17	0.0519786	6.25775	2.95391	7.22633	0.381032	66.6956	25.6223	283.143		461.36	730.327	1176.76	11386.7	0.0529058	3.05503	0.219319	10.2084	6.4637	48.8266	6.76789	335.154	709.759	1150.99	2883.5
14ZA161-4.1	0.324241	2.90438	115.989	91.9196	1067.94	22.9754	1073.8	25.0012	1137.05	36.6619	6.30035	5.53214	2.22599	0.0777333	1.815	5.53269	2.22617	0.0776493	1.84271	1.9351	2.88988	0.180744	2.22617	0.770333	716.408	0.0356403	18.8417	0.546372	1.12862	0.651845	12.5799	4.51776	56.5673		125.101	273.407	535.806	8098.92	0.527327	45.6733	0.150381	30.7368	1.19556	7.6258	11.5781	63.2158	125.146	229.948	781.882
14ZA161-19.1	-0.0981553	-2.97671	222.145	54.1192	1079.87	41.8647	1081	40.825	1057.26	149.356	-2.21982	5.48897	3.96897	0.074634	7.41554	5.48909	3.96898	0.0746145	7.41839	1.87423	8.4134	0.182179	3.96898	0.471745	983.574	0.0356679	3.57151	0.755137	2.46045	0.0910318	18.9186	7.57422	93.4012		180.32	322.398	546.868	12135.7	0.0406714	6.46331	0.150498	5.82627	1.65238	16.6247	1.61691	95.0686	209.812	379.68	1127
14ZA161-1.1	12.3129	495.873	307.267	65.0385	2655.03	50.5205	2952.33	41.2004	3417.45	5.14196	16.8795	1.72062	1.70125	0.290157	0.329979	1.72075	1.70127	0.290097	0.33067	23.2449	1.7331	0.581143	1.70127	0.98163	600.882	0.0216131	13.6565	0.384705	1.48924	0.345941	13.7305	4.83138	56.6135		107.182	247.206	476.446	12693.8	0.233198	47.7561	0.0911944	22.2782	0.841805	10.0624	6.14461	68.9976	133.833	230.136	669.885
Spot Name	7-corr %com 206	7-corr %com 208	ppm U	ppm Th	207corr 206Pb /238U Age	1s err	208corr 206Pb /238U Age	1s err	204corr 207Pb /206Pb Age	1s err	% Dis- cor- dant	Total 238 /206	% err	Total 207 /206	% err	4corr 238 /206*	% err	4corr 207* /206*	% err	4corr 207* /235	% err	4corr 206* /238	% err	err corr	Y (ppm)	La (ppm)	Ce (ppm)	Nd (ppm)	Sm (ppm)	Eu (ppm)	Gd (ppm)	Tb (ppm)	Dy (ppm)		Er (ppm)	Yb (ppm)	Lu (ppm)	Hf (ppm)	Eu (star)		La (ch)	Ce (ch)	Nd (ch)	Sm (ch)	Eu (ch)	Gd (ch)	Tb (ch)	Dy (chn)	Er (ch)
14ZA154-9.1	1.55701	8.98305	285.728	319.508	230.325	5.49763	234.301	6.83535	47.0198	240.728	-394.529	27.0633	2.40574	0.0632472	2.58654	27.6224	2.46803	0.046977	10.0761	0.234491	10.374	0.0362025	2.46803	0.237906	1025.97	7.27927	65.5429	11.9709	10.3003	2.93834	39.7599	10.9602	108.008		168.094	305.611	540.091	8207.76	0.442592	3.75765	30.7142	106.921	26.1944	69.5965	52.1907	199.799	303.605	439.058	1050.58
14ZA154-10.1	0.125049	1.36644	287.887	165.319	255.084	3.56915	254.861	4.18697	338.43	71.7838	24.9378	24.744	1.40655	0.052341	2.64197	24.716	1.41177	0.0532489	3.16917	0.297053	3.46939	0.0404597	1.41177	0.406921	809.448	0.0349869	22.5566	1.69763	3.01539	1.07022	20.0316	6.89086	77.967		144.515	288.428	523.498	9032.8	0.41975	19.0543	0.147624	36.7971	3.71472	20.3743	19.0092	100.661	190.882	316.939	903.22
14ZA154-3.1	0.22197	1.41779	729.791	723.815	257.477	5.45282	257.469	6.85343	190.068	68.3219	-35.9297	24.4857	2.14216	0.0531712	1.69995	24.5854	2.14696	0.0499159	2.93672	0.279939	3.63782	0.0406746	2.14696	0.590177	2535.65	1.48989	54.1607	6.40872	9.19572	3.04669	65.0601	21.4044	237.074		427.089	844.155	1468.87	8184.89	0.379688	8.70053	6.28647	88.3535	14.0235	62.1332	54.1153	326.935	592.92	963.716	2669.31
14ZA154-4.1	0.0354967	0.381349	301.858	176.997	268.08	3.56326	267.672	3.92178	280.675	57.9905	4.5474	23.5417	1.33696	0.0519151	2.53394	23.5417	1.33696	0.0519151	2.53394	0.304059	2.86502	0.0424779	1.33696	0.466651	625.099	0.0254572	25.9678	0.787456	1.90741	0.356914	15.541	5.92232	64.8493		104.09	177.913	306.643	10118	0.199826	46.2841	0.107414	42.3619	1.7231	12.8879	6.3395	78.0954	164.053	263.615	650.56
14ZA154-11.1	0.117237	1.23758	269.197	157.226	269.594	5.01903	268.812	5.5228	91.0817	138.976	-198.718	23.3876	1.87755	0.0526046	2.84045	23.5263	1.90047	0.0478551	5.86536	0.280463	6.16557	0.0425056	1.90047	0.308239	1236.77	0.443884	17.8804	2.5338	4.67077	1.58806	33.9531	11.1569	126.445		216.571	397.988	681.375	8870.99	0.384398	7.86498	1.87293	29.1686	5.54441	31.5592	28.2071	170.619	309.054	514.003	1353.57
14ZA154-1.1	1.22853	15.4762	602.684	337.938	272.031	4.16143	277.679	4.60419	214.581	167.316	-27.1413	22.9158	1.51256	0.0615719	4.38902	23.2377	1.54184	0.0504458	7.22409	0.299319	7.3868	0.0430335	1.54184	0.208729	1173.32	8.66023	32.535	7.44775	5.66221	2.16701	32.4547	10.1764	110.556		193.497	386.321	696.465	11222	0.487279	2.00897	36.5411	53.0751	16.297	38.2582	38.4904	163.089	281.894	449.414	1209.36
14ZA154-7.1	0.357664	4.29983	686.914	356.454	285.717	5.3277	285.966	5.7862	390.188	41.1751	27.1476	21.987	1.88778	0.0549002	1.65538	21.9984	1.88849	0.0544853	1.83452	0.341499	2.63284	0.0454578	1.88849	0.717283	1204.37	1.7648	31.1276	3.07959	3.4055	0.529632	26.4649	9.82773	116.261		210.669	371.483	629.745	8743.03	0.170058	7.15949	7.4464	50.7791	6.73872	23.0101	9.40731	132.989	272.236	472.606	1316.68
14ZA154-2.1	0.225005	3.12143	506.972	243.485	463.441	6.187	465.118	6.60377	519.755	33.9822	11.0687	13.3857	1.36038	0.0581292	1.41725	13.3918	1.36106	0.0577611	1.54839	0.5947	2.06155	0.0746726	1.36106	0.66021	2402.62	0.113138	7.83175	3.56245	7.91553	0.753511	72.6323	24.444	261.434		398.292	590.389	935.698	8442.26	0.095793	3.08875	0.477374	12.7761	7.79529	53.4833	13.3839	364.987	677.118	1062.74	2489.33
14ZA154-6.1	0.661739	6.46668	115.407	77.1624	476.057	12.6421	479.019	14.0134	622.744	80.8437	24.0637	12.9611	2.70587	0.0619962	2.88365	12.9841	2.71137	0.0605611	3.7482	0.643105	4.62608	0.077017	2.71137	0.586107	1046.59	0.0683687	14.0806	4.7922	8.54253	0.824629	48.8347	13.4787	127.725		162.303	227.628	349.552	7878.88	0.123069	4.2637	0.288476	22.97	10.4862	57.7198	14.647	245.401	373.372	519.208	1014.39
14ZA154-8.1	-0.126851	-3.32747	619.047	155.192	478.332	6.59177	477.833	6.73968	448.16	31.3133	-6.88459	12.9995	1.40606	0.0556554	1.32975	12.9953	1.40645	0.0559183	1.40932	0.593293	1.99105	0.0769509	1.40645	0.706387	2160.45	0.0111098	10.6418	0.755658	3.39697	0.604312	38.4627	16.2956	203.682		395.115	745.378	1228.64	11408.9	0.161155	20.4189	0.0468766	17.3601	1.65352	22.9525	10.7338	193.28	451.402	827.977	2469.47
14ZA154-13.1	5.06028	122.748	1367.77	275.407	565.87	14.0772	588.373	14.9411	1045.11	71.443	46.8834	10.3478	2.53834	0.100267	2.01685	10.6966	2.54611	0.074166	3.54205	0.956005	4.3622	0.0934876	2.54611	0.583676	3481.01	88.8401	186.026	82.3986	47.9329	30.9363	152.357	46.6979	434.65		504.094	873.239	1440.21	11264.1	1.10349	1.09327	374.853	303.469	180.303	323.871	549.491	765.615	1293.57	1766.87	3150.59
14ZA154-5.1	0.0899596	6.86849	387.329	32.4717	820.686	8.23571	820.822	8.06115	856.381	35.0669	4.30586	7.35889	1.02907	0.0672268	1.58185	7.35528	1.03031	0.0676316	1.68867	1.2678	1.97817	0.135957	1.03031	0.52084	628.538	0.939131	3.34324	1.54022	2.90528	0.370433	29.4047	11.2004	94.8855		66.3126	79.4446	119.782	14043.4	0.122168	1.48752	3.96258	5.4539	3.37028	19.6303	6.57962	147.762	310.259	385.713	414.454
14ZA154-12.1	0.35655	5.56543	481.975	226.05	1595.95	23.3649	1600.21	22.7756	1651.49	10.8158	3.46174	3.54715	1.50833	0.101623	0.576247	3.54753	1.50837	0.101531	0.583515	3.94615	1.6173	0.281886	1.50837	0.932645	1465.4	0.138169	30.1865	1.09508	3.43814	0.181161	31.3783	12.2994	143.873		270.972	464.116	780.947	10596.2	0.0531665	33.0582	0.582991	49.2439	2.39623	23.2307	3.21778	157.68	340.703	584.85	1693.58
Spot Name	7-corr %com 206	7-corr %com 208	ppm U	ppm Th	207corr 206Pb /238U Age	1s err	208corr 206Pb /238U Age	1s err	204corr 207Pb /206Pb Age	1s err	% Dis- cor- dant	Total 238 /206	% err	Total 207 /206	% err	4corr 238 /206*	% err	4corr 207* /206*	% err	4corr 207* /235	% err	4corr 206* /238	% err	err corr	Y (ppm)	La (ppm)	Ce (ppm)	Nd (ppm)	Sm (ppm)	Eu (ppm)	Gd (ppm)	Tb (ppm)	Dy (ppm)		Er (ppm)	Yb (ppm)	Lu (ppm)	Hf (ppm)	Eu (star)		La (ch)	Ce (ch)	Nd (ch)	Sm (ch)	Eu (ch)	Gd (ch)	Tb (ch)	Dy (chn)	Er (ch)
14ZA130-3.1	-0.0200886	-16.4358	1125.7	8.78789	496.543	6.48299	496.432	6.38315	484.753	20.8302	-2.48855	12.4915	1.33433	0.0569914	0.909596	12.4937	1.33444	0.0568499	0.943449	0.627394	1.63426	0.0800404	1.33444	0.816537	197.911	0.00672732	0.929072	0.00653874	0.0498088	0.0226515	0.823357	0.582047	10.2718		41.4756	150.572	399.051	13247.9	0.340956	71.0002	0.0283853	1.51561	0.014308	0.336546	0.402335	4.13747	16.1232	41.7555	259.223
14ZA130-5.1	-0.0145039	-1.64502	784.845	45.8195	499.127	5.602	499.099	5.57591	468.815	30.2039	-6.61712	12.4236	1.14549	0.0571038	1.17306	12.4337	1.14644	0.0564415	1.36425	0.62589	1.782	0.0804263	1.14644	0.643346	497.907	0.0082565	4.18049	0.177316	0.592888	0.0450156	7.50789	3.28705	43.3542		95.0844	216.619	454.314	12874.5	0.0650379	32.257	0.0348375	6.81972	0.387999	4.006	0.799566	37.7281	91.054	176.236	594.278
14ZA130-2.1	0.13946	1.80973	171.384	82.7188	514.693	11.5812	513.471	12.3338	499.855	64.0333	-3.03939	12.0147	2.29851	0.0587622	2.15407	12.0372	2.30232	0.0572406	2.90775	0.655663	3.70887	0.083076	2.30232	0.620762	518.006	0.0211993	10.9752	0.497341	1.50434	0.409765	12.7876	4.34149	52.2713		93.4406	168.49	285.791	8819.47	0.284784	30.4045	0.0894484	17.9041	1.08827	10.1645	7.27823	64.2592	120.263	212.485	584.004
14ZA130-4.1	2.23914	33.5224	235.51	123.938	584.733	12.8131	605.388	13.8467	746.04	114.103	22.1692	10.2963	2.23348	0.0777902	2.71775	10.4721	2.25839	0.0641615	5.39859	0.84478	5.85193	0.0954922	2.25839	0.385922	472.962	4.5916	14.8798	6.56261	7.91339	1.17285	42.1538	10.3155	77.3212		52.466	63.7203	100.369	9271.91	0.195746	1.43912	19.3738	24.2737	14.3602	53.4688	20.8322	211.828	285.747	314.314	327.912
14ZA130-6.1	-0.248693	-2.49733	56.2293	39.7247	794.773	11.5372	797.109	12.5807	780.768	87.3001	-1.85276	7.64024	1.47785	0.0636086	3.28795	7.62531	1.49253	0.0652275	4.15366	1.17944	4.41368	0.131142	1.49253	0.338161	903.564	0.0441614	7.33548	2.58411	5.11637	0.676282	34.789	10.4441	108.188		151.599	234.239	375.802	8614.57	0.154517	4.09753	0.186335	11.9665	5.65451	34.5701	12.0121	174.819	289.309	439.79	947.496
14ZA130-1.1	-0.205609	-2.92827	36.3117	17.0277	1088.25	18.1208	1083.15	18.4732	987.475	86.7214	-10.6083	5.44888	1.7053	0.0740468	3.18132	5.46157	1.72113	0.0720857	4.26208	1.81984	4.59648	0.183098	1.72113	0.374446	1024.53	0.0467707	4.21595	2.45959	5.07433	1.43079	33.4429	10.7911	114.254		174.237	278.299	462.134	7845.88	0.334798	2.46535	0.197345	6.87756	5.38204	34.286	25.4137	168.055	298.922	464.445	1088.98
14ZA130-8.1	0.4658	3.28702	142.031	141.171	1357.37	35.1196	1358.55	38.3281	1412.76	25.113	4.06166	4.24686	2.68116	0.0908694	1.08383	4.25402	2.68221	0.0894398	1.31266	2.8989	2.98618	0.235072	2.68221	0.898205	776.291	21.0386	69.9302	4.25008	3.27724	0.933142	19.964	6.53622	74.1937		141.114	271.488	469.883	7671.39	0.351656	2.32646	88.7705	114.079	9.29995	22.1435	16.5745	100.322	181.059	301.6	881.963
14ZA130-7.1	-0.759722	-13.0976	35.5008	17.0619	2607.31	75.3556	2588.06	59.3054	2541.08	19.2002	-2.38836	2.0213	2.61662	0.168432	1.14268	2.02137	2.61666	0.168401	1.14528	11.4868	2.85632	0.494715	2.61666	0.916094	135.006	0.013676	2.08106	0.0336401	0.158314	0.0900317	1.56607	0.733817	10.242		27.2965	60.6639	114.111	8767.67	0.551161	51.7057	0.0577046	3.39488	0.0736108	1.06969	1.59914	7.8697	20.3273	41.6341	170.603
Spot Name	7-corr %com 206	7-corr %com 208	ppm U	ppm Th	207corr 206Pb /238U Age	1s err	208corr 206Pb /238U Age	1s err	204corr 207Pb /206Pb Age	1s err	% Dis- cor- dant	Total 238 /206	% err	Total 207 /206	% err	4corr 238 /206*	% err	4corr 207* /206*	% err	4corr 207* /235	% err	4corr 206* /238	% err	err corr	Y (ppm)	La (ppm)	Ce (ppm)	Nd (ppm)	Sm (ppm)	Eu (ppm)	Gd (ppm)	Tb (ppm)	Dy (ppm)		Er (ppm)	Yb (ppm)	Lu (ppm)	Hf (ppm)	Eu (star)		La (ch)	Ce (ch)	Nd (ch)	Sm (ch)	Eu (ch)	Gd (ch)	Tb (ch)	Dy (ch)	Er (ch)
14ZA116-10.1	12.8854	59.5067	908.588	716.414	227.527	4.7366	233.286	6.47516	403.146	361.475	44.047	24.2488	1.95963	0.153802	3.49182	27.6938	2.11699	0.0548012	16.1418	0.272841	16.28	0.0361092	2.11699	0.130036	2233.99	85.9587	160.326	86.6108	33.6729	6.59934	108.967	31.6046	293.798		368.686	545.558	883.798	7666.29	0.332094	0.947249	362.695	261.543	189.52	227.52	117.217	547.575	875.473	1194.3	2304.28
14ZA116-15.1	-0.10165	-0.627329	215.241	219.431	229.928	7.31688	228.984	8.81752	306.492	107.809	25.2669	27.5676	3.21277	0.0499685	3.26573	27.4803	3.22138	0.0525054	4.73265	0.263442	5.72497	0.0363898	3.22138	0.562689	1183.4	0.287187	22.3737	4.61962	7.84666	3.07611	46.8036	13.6965	133.77		193.375	330.147	578.491	6636.51	0.489292	6.44835	1.21176	36.4987	10.1086	53.0179	54.6377	235.194	379.405	543.78	1208.6
14ZA116-25.1	0.382107	3.25236	587.281	441.109	233.327	3.52162	234.176	4.03019	319.005	55.9793	27.1693	27.0276	1.52162	0.0539141	1.90942	27.0655	1.52485	0.0527949	2.46289	0.268953	2.89673	0.0369474	1.52485	0.526405	1212.97	0.0468742	10.4072	1.10436	3.18962	0.966105	33.9891	11.9565	134.308		226.739	373.741	671.762	7324.33	0.282835	12.988	0.197781	16.9775	2.41655	21.5515	17.16	170.8	331.205	545.969	1417.12
14ZA116-1.1	0.211811	2.10798	590.581	372.558	236.778	9.33076	236.773	10.3473	200.595	62.9364	-18.2546	26.672	3.98619	0.0526278	1.71725	26.755	3.9882	0.0501425	2.71044	0.258406	4.82205	0.0373761	3.9882	0.827074	909.928	0.217209	13.2881	1.21232	2.86469	0.698204	25.5041	8.96376	97.2878		157.396	252.229	440.596	6787.5	0.248993	12.1465	0.916495	21.6771	2.65279	19.356	12.4015	128.161	248.304	395.479	983.726
14ZA116-26.1	-0.231287	-2.02937	215.345	143.056	240.871	2.04115	237.638	2.35547	214.494	92.2492	-12.4474	26.3268	0.836393	0.0491716	3.09937	26.285	0.852277	0.050444	3.98292	0.264607	4.07309	0.0380445	0.852277	0.209246	1126.64	0.0590171	11.3693	1.33761	3.49688	1.29509	30.2753	11.2571	124.283		207.68	363.201	656.77	7290.33	0.383675	11.6796	0.249017	18.547	2.92694	23.6275	23.0033	152.137	311.831	505.215	1298
14ZA116-2.1	0.0524396	0.707642	183.492	83.1469	243.224	10.3079	242.488	11.0538	256.872	61.2484	5.37772	25.9935	4.28671	0.0514951	2.58089	25.9972	4.28691	0.051379	2.66484	0.272496	5.04767	0.0384656	4.28691	0.849284	645.241	0.0225577	5.94936	0.739419	2.07393	0.548145	17.8314	6.47153	71.5525		119.768	205.125	357.758	7556.49	0.274761	11.3303	0.0951801	9.70532	1.61798	14.013	9.73614	89.6051	179.267	290.864	748.547
14ZA116-28.1	0.0769372	1.44042	297.899	106.078	247.761	4.7971	248.504	5.10964	137.031	105.81	-81.8332	25.5023	1.95312	0.0517921	2.59206	25.5978	1.96505	0.0487963	4.50392	0.262837	4.91393	0.0390659	1.96505	0.399893	741.942	0.735797	10.1344	0.93537	2.07882	0.263161	17.4075	6.5947	77.3133		134.619	238.243	417.415	8225.09	0.13335	6.41867	3.10463	16.5325	2.04676	14.0461	4.67427	87.4749	182.679	314.282	841.371
14ZA116-38.1	0.290408	2.40849	552.83	420.037	247.817	5.45098	247.973	6.20443	349.201	43.8468	29.3882	25.4419	2.22322	0.0535029	1.93949	25.4419	2.22322	0.0535029	1.93949	0.289955	2.95031	0.0393053	2.22322	0.753555	1923.89	0.0909875	23.207	3.18955	8.0614	2.27757	64.4518	21.792	226.823		329.213	503.304	840.166	7605.67	0.304578	10.283	0.383914	37.8581	6.97933	54.4689	40.4542	323.878	603.656	922.045	2057.58
14ZA116-17.1	0.819884	11.0641	468.494	204.403	248.945	6.90352	249.373	7.43173	397.256	74.2735	37.7883	25.1899	2.80411	0.0577687	1.98709	25.2886	2.80957	0.0546573	3.31329	0.298006	4.34415	0.0395435	2.80957	0.646749	1462.74	1.51865	18.9907	2.54313	3.87891	1.08472	33.2203	12.3283	145.03		266.296	460.396	826.754	7186.19	0.291278	5.17513	6.40782	30.98	5.56483	26.2088	19.2667	166.936	341.503	589.551	1664.35
14ZA116-24.1	-0.0852681	-0.486026	164.594	189.261	251.413	8.94366	252.389	13.5905	143.884	120.362	-75.6949	25.1655	3.59452	0.0505742	3.75302	25.2168	3.6003	0.0489389	5.12984	0.267588	6.26717	0.0396561	3.6003	0.57447	582.502	0.0364871	38.1793	0.925238	2.6825	1.21847	19.3285	6.55341	67.2743		111.116	223.384	421.963	9824.31	0.515817	57.1783	0.153954	62.2827	2.02459	18.125	21.6425	97.128	181.535	273.473	694.473
14ZA116-14.1	0.170497	1.27171	612.408	519.717	251.921	5.75778	251.866	6.66937	248.711	56.0077	-1.30714	25.0495	2.31149	0.0526343	1.78763	25.0945	2.31372	0.0511971	2.43323	0.281298	3.35767	0.0398493	2.31372	0.689086	1375.02	0.487083	15.6561	1.88335	4.23734	1.16125	40.6492	14.2311	153.698		237.355	381.507	654.534	6977.94	0.269713	8.27033	2.0552	25.5401	4.12112	28.6307	20.6261	204.267	394.214	624.787	1483.47
14ZA116-31.1	0.822597	7.94629	499.928	300.535	252.493	1.7537	251.865	1.98874	427.103	68.8708	41.3839	24.8284	0.687739	0.0578708	2.02395	24.9059	0.705214	0.0553918	3.08835	0.306652	3.16784	0.0401512	0.705214	0.222617	2468.14	1.43494	21.5959	5.62776	10.9062	2.52616	85.7936	28.7632	304.342		439.946	684.954	1141.15	8845.37	0.251736	3.83575	6.05459	35.2298	12.3146	73.6903	44.8696	431.124	796.763	1237.16	2749.66
14ZA116-10.3	5.56648	33.5241	1259.51	1047.31	253.496	3.52574	257.15	4.21522	153.6	353.271	-65.8791	23.5454	1.35232	0.0958973	3.10845	25.0006	1.58902	0.0491422	15.0834	0.271023	15.1669	0.0399991	1.58902	0.104769	3047.59	63.0446	179.21	71.0084	30.2125	4.78185	139.911	41.9019	402.792		529.73	787.145	1311.66	8540.98	0.224195	1.38754	266.011	292.349	155.379	204.139	84.9352	703.07	1160.72	1637.37	3310.81
14ZA116-37.1	0.327956	2.95703	244.321	168.491	254.254	2.21802	254.138	2.52555	318.449	121.911	20.4131	24.776	0.82255	0.053948	4.77306	24.8122	0.835409	0.052782	5.36312	0.293307	5.4278	0.0403027	0.835409	0.153913	1439.22	0.0792073	13.8821	3.6892	8.40104	2.68452	55.3477	17.7997	179.042		253.335	409.46	698.649	8965.13	0.379488	5.38755	0.334208	22.6462	8.07265	56.7638	47.6823	278.129	493.067	727.815	1583.34
14ZA116-21.1	7.44474	44.5214	198.448	122.023	254.373	8.21225	253.182	9.87568	475.997	416.286	47.1293	22.9959	3.24756	0.110967	2.53629	24.6812	3.49239	0.056625	18.8262	0.316332	19.1474	0.0405167	3.49239	0.182395	1068.33	10.1203	20.7259	3.69738	4.61551	1.42158	31.9946	11.1646	115.82		182.72	303.993	529.274	7953.36	0.356592	1.33133	42.7018	33.8106	8.09055	31.1859	25.2501	160.777	309.27	470.811	1142
14ZA116-6.1	0.110994	1.06147	359.468	229.93	255.417	5.25423	254.359	5.84496	223.965	75.3417	-14.2248	24.7146	2.07802	0.0522358	2.31091	24.7635	2.08274	0.0506508	3.25854	0.282017	3.86728	0.040382	2.08274	0.538554	1422.62	0.108023	20.5125	1.41918	3.57807	1.28308	34.6308	13.0782	148.087		246.899	428.882	754.826	7765.56	0.351357	18.7928	0.455794	33.4625	3.10542	24.1761	22.7901	174.024	362.277	601.978	1543.12
14ZA116-29.1	-0.371988	-3.49976	189.09	130.233	255.647	2.22139	255.033	2.54674	-80.126	178.626	424.745	24.8114	0.850984	0.0483713	3.73129	24.9286	0.914253	0.0445707	7.29771	0.24652	7.35476	0.0401145	0.914253	0.124308	1176.39	0.36919	11.4925	4.21623	7.24395	2.58877	46.0271	14.9216	140.953		203.424	334.022	585.655	8237.28	0.432164	3.47712	1.55776	18.748	9.22588	48.9456	45.9817	231.292	413.341	572.978	1271.4
14ZA116-39.1	0.101949	1.19868	295.607	153.571	256.967	6.56109	256.117	7.11991	367.81	78.2562	30.5163	24.5648	2.58064	0.0521981	2.59863	24.5111	2.58573	0.0539459	3.47293	0.303456	4.32981	0.0407978	2.58573	0.597193	1433.2	0.153223	8.3759	3.25976	7.22963	1.65585	50.9375	17.1751	175.48		254.199	404.88	670.654	8377.66	0.263023	3.51279	0.64651	13.6638	7.13294	48.8488	29.4113	255.968	475.763	713.335	1588.75
14ZA116-4.1	0.172843	1.89214	579.807	334.999	257.294	4.24794	257.383	4.66527	292.512	51.7241	12.1941	24.5155	1.66732	0.0527735	1.95876	24.5336	1.66885	0.0521846	2.26493	0.29328	2.81335	0.0407605	1.66885	0.593188	873.716	0.427202	17.6252	1.15463	2.88069	0.632075	22.8529	8.09439	90.6731		155.851	267.232	459.866	8312.07	0.237465	13.2833	1.80254	28.7523	2.52654	19.4641	11.2269	114.839	224.221	368.59	974.071
14ZA116-16.1	-0.156189	-1.76044	500.188	280.173	257.388	4.48225	256.615	4.86142	226.467	88.098	-13.8309	24.5872	1.7489	0.0501391	3.67699	24.5698	1.75042	0.0507057	3.81198	0.284548	4.19466	0.0407004	1.75042	0.417298	2434.04	0.110124	11.731	4.72168	11.4742	3.00919	88.3509	28.9603	294.168		429.326	676.019	1144.67	7630.05	0.288092	3.54503	0.464657	19.1371	10.3319	77.5283	53.4492	443.974	802.225	1195.8	2683.29
14ZA116-8.1	0.380959	3.63879	265.382	170.942	259.652	5.25139	259.412	5.8588	387.723	62.5412	33.4511	24.2378	2.04028	0.0544942	2.73545	24.2399	2.04057	0.0544256	2.78526	0.309581	3.45277	0.0412543	2.04057	0.590995	1915.01	0.14852	11.0298	4.92769	11.3181	4.29504	79.8221	24.5921	242.666		330.966	502.797	835.186	8904.2	0.43558	3.15409	0.626667	17.9931	10.7827	76.4736	76.2884	401.116	681.221	986.448	2068.54
14ZA116-9.1	0.263418	3.26583	293.76	152.632	260.19	5.20401	260.958	5.65294	386.884	67.953	33.1641	24.2152	2.01878	0.0535644	2.57855	24.1897	2.02191	0.0544052	3.02582	0.310107	3.6392	0.0413399	2.02191	0.555594	1703.44	0.044643	7.40577	3.16339	7.59334	1.89542	57.3804	19.6913	206.303		304.604	484.411	817.413	8611.2	0.276793	3.39816	0.188367	12.0812	6.92207	51.3064	33.6664	288.344	545.464	838.631	1903.78
14ZA116-32.1	0.300626	3.09801	408.801	256.397	260.816	2.86838	261.793	3.19185	362.974	50.3438	28.5056	24.1469	1.1042	0.0538767	2.20348	24.1483	1.10444	0.0538303	2.2323	0.307355	2.49057	0.0414107	1.10444	0.44345	1891.39	0.0639882	19.7494	4.15687	7.60179	1.88759	60.7052	21.6504	225.201		333.504	527.365	886.352	10140.1	0.267847	6.87969	0.269992	32.2176	9.096	51.3634	33.5274	305.051	599.733	915.449	2084.4
14ZA116-20.1	-0.053928	-0.471226	794.669	562.155	264.153	4.51182	262.795	5.07663	228.471	40.418	-15.826	23.9204	1.72767	0.0511099	1.58693	23.9311	1.72825	0.0507497	1.74951	0.292396	2.4592	0.0417866	1.72825	0.702771	4006.7	0.798662	26.4689	9.67609	23.0479	5.51356	152.411	50.0012	491.372		686.88	1033.29	1691.04	8005.45	0.283568	3.51867	3.36988	43.1793	21.1731	155.729	97.9317	765.882	1385.07	1997.45	4293
14ZA116-19.1	-0.138759	-1.28032	639.58	436.724	264.224	6.45467	263.297	7.28439	150.203	87.5606	-76.9371	23.9341	2.46662	0.0504315	3.27801	23.9747	2.46856	0.049071	3.73619	0.28221	4.47805	0.0417107	2.46856	0.551259	3096.56	0.709303	22.5479	6.49021	15.3356	3.55984	115.074	37.2275	377.046		542.979	826.434	1377.76	8456.02	0.258309	4.27842	2.99284	36.7829	14.2018	103.619	63.2298	578.262	1031.23	1532.71	3393.62
14ZA116-33.1	-0.149819	-1.17551	912.414	741.13	264.617	4.06442	263.972	4.65496	194.28	39.7152	-36.6896	23.9005	1.55327	0.0503516	1.55124	23.9108	1.55387	0.0500064	1.70842	0.288359	2.30937	0.0418221	1.55387	0.672854	1461.05	0.0366608	15.5403	1.45759	3.86256	1.06439	39.3615	15.1099	164.237		266.832	432.126	731.564	8629.36	0.263134	15.1614	0.154687	25.3512	3.18949	26.0984	18.9057	197.796	418.556	667.63	1667.7
14ZA116-13.1	-0.0554847	-0.674827	217.517	114.601	268.121	7.64283	267.934	8.28482	298.354	82.0729	10.2683	23.5594	2.88286	0.0511865	2.88874	23.5262	2.88654	0.0523183	3.59762	0.306622	4.61248	0.0425058	2.88654	0.62581	1413.79	0.0671056	5.67428	2.27632	6.02454	1.94442	43.4533	15.0351	157.964		255.81	411.169	726.167	7475.93	0.366325	3.51683	0.283146	9.25657	4.981	40.7064	34.5368	218.358	416.484	642.13	1598.82
14ZA116-18.1	-0.241957	-2.73062	207.63	118.423	269.675	3.71056	269.104	4.0633	232.954	86.719	-15.9773	23.4645	1.38211	0.0497262	2.99656	23.4318	1.39015	0.0508483	3.75674	0.299208	4.00569	0.0426771	1.39015	0.347043	959.173	0.0421035	13.4685	1.08412	2.21368	1.02225	21.9478	8.46344	96.3477		169.66	307.677	558.864	7919.25	0.447047	17.2331	0.177652	21.9715	2.37226	14.9573	18.1572	110.29	234.444	391.657	1060.38
14ZA116-36.1	0.429239	4.10496	472.319	343.995	273.101	5.08438	276.923	5.75202	341.928	64.3432	20.4003	23.0089	1.88228	0.0551862	1.95473	23.0623	1.88696	0.0533312	2.84244	0.318845	3.41176	0.0433608	1.88696	0.553076	2020.58	7.03155	28.4099	8.61378	10.9495	2.92917	67.8355	22.5532	232.382		352.222	557.715	948.086	8778.76	0.327619	1.91047	29.669	46.3457	18.8485	73.9829	52.0279	340.882	624.741	944.642	2201.38
14ZA116-23.1	-0.418032	-4.2822	470.413	288.193	274.155	2.02468	272.38	2.2659	148.564	59.9483	-85.7211	23.1135	0.736567	0.0484146	2.22663	23.0956	0.740874	0.0490367	2.5572	0.292747	2.66237	0.0432982	0.740874	0.278277	2151.02	0.0743846	15.2168	4.47558	10.7437	2.61672	73.8379	25.3656	258.469		376.893	590.109	985.444	7753.73	0.283197	4.91202	0.313859	24.8235	9.79339	72.5926	46.4781	371.045	702.649	1050.69	2355.58
14ZA116-3.1	-0.0555135	-0.544962	84.7502	55.8859	286.897	5.90798	286.955	6.59921	396.234	161.776	27.9796	21.9853	2.06659	0.0516109	4.71357	21.9026	2.1028	0.0546324	7.21545	0.343919	7.51561	0.0456567	2.1028	0.279791	1027	0.0294331	13.2567	0.83794	2.5771	0.952375	22.4064	8.88671	102.31		184.72	334.983	615.068	8332.1	0.382037	22.0926	0.12419	21.626	1.83357	17.4128	16.9161	112.595	246.169	415.894	1154.5
14ZA116-7.1	1.49128	12.8121	265.513	209.927	313.717	11.07	320.551	12.759	-431.284	523.992	175.753	19.7535	3.57263	0.0646605	3.38669	20.3985	3.6857	0.0388016	19.9626	0.262272	20.3	0.0490231	3.6857	0.181561	1160.5	19.5218	47.9074	12.9858	9.81163	3.24533	50.3681	13.08	125.932		175.445	272.32	463.741	5888.85	0.444999	1.41087	82.3704	78.1523	28.4153	66.2948	57.6435	253.106	362.326	511.92	1096.53
14ZA116-34.1	3.42887	34.4833	1385.81	639.479	381.573	5.90109	383.037	6.46247	190.925	141.631	-101.768	15.837	1.55557	0.0819488	2.3507	16.4875	1.58086	0.0499343	6.08876	0.417586	6.29064	0.060652	1.58086	0.251304	1766.69	65.7511	682.864	72.2605	34.4257	8.2257	89.8011	24.675	221.329		308.885	541.831	912.018	13413.3	0.450962	5.11524	277.431	1113.97	158.119	232.606	146.105	451.262	683.519	899.711	1930.53
14ZA116-35.1	-0.0453481	-0.500798	541.948	315.171	384.298	2.79498	383.753	3.11088	393.239	52.6154	2.31601	16.2869	0.727471	0.0539766	2.09402	16.2751	0.731281	0.0545595	2.34548	0.462219	2.45684	0.0614435	0.731281	0.297651	709.859	0.0619208	36.261	0.881422	2.30285	0.604661	15.9478	6.44874	70.7908		128.397	257.404	471.345	11050.7	0.304143	54.0218	0.261269	59.1534	1.92871	15.5598	10.74	80.1396	178.636	287.767	802.478
14ZA116-11.1	-0.0632103	-1.23244	504.116	170.773	458.059	6.56068	458.041	6.81629	436.025	32.8112	-5.16321	13.5878	1.45985	0.0556558	1.45707	13.5885	1.45993	0.0556141	1.47363	0.564304	2.07436	0.0735914	1.45993	0.703797	914.717	0.0285728	11.2751	0.223532	0.882382	0.167333	12.4707	5.57125	75.128		179.013	400.225	768.248	12334	0.153765	60.337	0.12056	18.3934	0.489128	5.96204	2.97217	62.6668	154.328	305.398	1118.83
14ZA116-12.1	0.261676	4.76195	246.005	86.8556	465.969	7.85367	466.694	8.20412	592.391	53.3877	21.7961	13.3056	1.71637	0.0584911	1.99961	13.2854	1.71994	0.059717	2.4627	0.619762	3.00385	0.0752707	1.71994	0.572579	1900.41	0.0124861	9.12251	0.611223	2.61148	0.450868	32.8452	14.6195	184.643		349.348	632.137	1105.72	11530.7	0.148395	21.4102	0.0526839	14.8817	1.33747	17.6451	8.00831	165.051	404.974	750.581	2183.43
14ZA116-27.1	0.250378	4.72267	395.359	134.063	979.886	15.4799	978.578	15.667	1046.71	28.2924	6.61139	6.07615	1.63322	0.0739088	1.33864	6.07384	1.63369	0.0742248	1.40303	1.68495	2.15347	0.16464	1.63369	0.75863	251.355	0.0204115	16.2717	0.225347	0.472272	0.268573	4.47772	1.78302	21.4602		44.0944	108.036	224.679	14275.9	0.562972	91.6546	0.0861243	26.5443	0.493101	3.19103	4.77039	22.5011	49.3911	87.2366	275.59
14ZA116-30.1	0.281597	6.68533	699.81	200.457	1049.4	11.4694	1051.31	11.4679	1099.7	14.7907	4.74152	5.64058	1.13217	0.0766854	0.679768	5.64379	1.13246	0.0762092	0.739318	1.86182	1.35243	0.177186	1.13246	0.837354	817.551	0.798429	17.3116	1.31288	2.23676	0.3524	18.4308	7.34824	82.8617		151.832	292.06	518.308	10191.4	0.167302	9.04905	3.3689	28.2409	2.87283	15.1133	6.25932	92.6173	203.552	336.836	948.948
14ZA116-5.1	0.319382	90.5058	486.826	16.6911	1088.96	23.8665	1093.57	22.9466	1142.49	17.1877	4.85895	5.41652	2.27341	0.0784855	0.78002	5.42055	2.27365	0.0778622	0.864587	1.98054	2.43249	0.184483	2.27365	0.934702	1639	0.837704	27.9859	1.1732	1.61172	0.885214	12.4881	8.40807	136.273		302.279	484.858	812.158	13354.3	0.601457	14.9641	3.53461	45.6539	2.56717	10.89	15.7232	62.7542	232.911	553.956	1889.25
14ZA116-22.1	-0.0333212	-0.28203	93.0183	84.7725	1887.73	53.1362	1888.82	52.7582	1882.91	40.9325	-0.259513	2.94026	2.84161	0.115261	2.27152	2.94031	2.84162	0.115244	2.27265	5.40412	3.63864	0.3401	2.84162	0.780955	1500.64	0.0289886	50.9039	2.06988	5.34652	0.739019	42.8676	16.2719	177.965		271.539	435.375	727.734	11164	0.1488	35.7042	0.122315	83.0406	4.52927	36.1251	13.1264	215.415	450.745	723.433	1697.12
Spot Name	7-corr %com 206	7-corr %com 208	ppm U	ppm Th	207corr 206Pb /238U Age	1s err	208corr 206Pb /238U Age	1s err	204corr 207Pb /206Pb Age	1s err	% Dis- cor- dant	Total 238 /206	% err	Total 207 /206	% err	4corr 238 /206*	% err	4corr 207* /206*	% err	4corr 207* /235	% err	4corr 206* /238	% err	err corr	Y (ppm)	La (ppm)	Ce (ppm)	Nd (ppm)	Sm (ppm)	Eu (ppm)	Gd (ppm)	Tb (ppm)	Dy (ppm)		Er (ppm)	Yb (ppm)	Lu (ppm)	Hf (ppm)	Eu (star)		La (ch)	Ce (ch)	Nd (ch)	Sm (ch)	Eu (ch)	Gd (ch)	Tb (ch)	Dy (ch)	Er (ch)
14ZA142-41.1	0.316914	3.0852	187.425	117.54	225.859	6.21925	225.417	7.01003	252.861	117.461	10.8001	27.9558	2.77519	0.0532271	3.50976	28.0237	2.78464	0.0512895	5.10687	0.25235	5.81673	0.035684	2.78464	0.478729	928.395	11.4315	76.4005	13.3991	8.70716	2.23726	27.5666	8.78708	94.6895		169.406	308.923	542.857	10423.2	0.440186	3.21413	48.234	124.634	29.3197	58.8322	39.7382	138.525	243.41	384.917	1058.79
14ZA142-3.1	2.27084	23.2253	421.582	257.685	247.907	5.7754	252.894	6.73524	259.815	181.983	4.64059	24.9274	2.35211	0.0693653	1.99037	25.4981	2.4001	0.0514449	7.92208	0.278186	8.27767	0.0392185	2.4001	0.289948	1335.37	8.40485	86.1711	17.682	12.4354	5.61981	45.0282	13.9536	141.961		237.697	474.524	842.129	13601.6	0.723933	3.79133	35.4635	140.573	38.6914	84.0231	99.8191	226.272	386.525	577.076	1485.61
14ZA142-40.1	0.325751	2.6922	454.867	323.955	255.971	9.28275	253.982	10.6956	368.772	47.6145	30.9729	24.6071	3.6703	0.0539689	2.11344	24.6071	3.6703	0.0539689	2.11344	0.302402	4.2353	0.0406387	3.6703	0.866598	1788.91	0.429115	51.6914	3.52885	6.81983	2.12492	45.9999	16.7382	182.799		313.73	590.03	1026.17	12390	0.365701	17.6924	1.81061	84.3253	7.72178	46.0799	37.7429	231.155	463.663	743.086	1960.81
14ZA142-37.1	56.233	90.6963	388.902	323.63	256.137	50.6491	255.555	112.699	835.942	3595.18	70.1439	10.7978	14.1351	0.501918	9.91358	24.1905	14.6585	0.0669702	172.569	0.381714	173.191	0.0413385	14.6585	0.0846377	977.327	0.194085	48.8616	1.3658	3.31523	1.53939	24.8026	8.8606	102.762		177.171	314.09	549.859	7699.84	0.517478	41.8689	0.818925	79.709	2.98863	22.4002	27.3426	124.636	245.446	417.73	1107.32
14ZA142-34.1	-0.148188	-1.50762	607.696	384.023	265.526	3.06842	265.191	3.39714	76.3742	73.2839	-251.067	23.8166	1.16552	0.050385	1.79691	23.9004	1.17425	0.0475594	3.08439	0.274367	3.30035	0.0418403	1.17425	0.355796	1630.97	0.0708102	72.5491	1.00009	3.64984	1.47733	36.0477	14.1403	165.504		302.264	559.195	969.322	11874.2	0.392601	95.1696	0.298777	118.351	2.18838	24.6611	26.2404	181.144	391.697	672.782	1889.15
14ZA142-35.1	1.03647	7.32145	244.415	211.972	267.164	2.22019	267.931	2.66472	322.466	141.393	17.3768	23.3876	0.818631	0.0599196	2.61587	23.5952	0.894535	0.0528754	6.22465	0.30898	6.2886	0.0423815	0.894535	0.142247	1190.33	0.535546	40.1453	2.8061	4.54057	1.85025	30.5077	11.4036	121.435		215.899	416.904	754.553	10752.9	0.479202	15.5929	2.25969	65.4899	6.14026	30.6795	32.864	153.305	315.889	493.639	1349.37
14ZA142-25.1	-0.0368773	-0.840652	625.438	171.407	271.119	3.61341	270.692	3.74322	238.839	42.5368	-13.6993	23.2892	1.34673	0.0514032	1.64312	23.3015	1.34771	0.0509782	1.8447	0.301649	2.28456	0.0429157	1.34771	0.58992	765.04	0.0292339	12.3746	0.282522	1.27323	0.251373	13.5996	5.49383	71.2005		148.683	336.297	620.436	11001.3	0.184141	54.4443	0.12335	20.1869	0.618211	8.60293	4.46488	68.3399	152.184	289.433	929.267
14ZA142-1.1	-0.05392	-0.483359	456.611	322.736	273.606	1.78967	273.011	2.0406	227.67	54.1615	-20.4546	23.0769	0.650474	0.0513226	2.00927	23.0939	0.654623	0.0507321	2.34407	0.302891	2.43376	0.0433015	0.654623	0.268976	1660.61	0.0998315	48.4857	1.89643	4.76091	1.51254	37.8191	15.1337	169.475		306.404	589.915	1033.02	12375.2	0.343601	34.6079	0.42123	79.0957	4.14973	32.1683	26.8657	190.046	419.217	688.922	1915.02
14ZA142-7.1	-0.201166	-1.57485	551.902	449.694	273.893	4.8388	273.089	5.53704	200.853	44.0836	-36.8691	23.0861	1.78692	0.0501481	1.89861	23.0861	1.78692	0.0501481	1.89861	0.299505	2.60726	0.0433161	1.78692	0.685364	1130.59	0.0493501	33.7082	1.13041	3.40077	1.22902	28.1685	10.0773	111.862		208.772	407.25	750.024	10960.2	0.382769	41.0094	0.208228	54.9889	2.47354	22.9782	21.8298	141.55	279.149	454.723	1304.83
14ZA142-20.1	0.290194	2.38942	334.139	253.937	284.678	3.20701	284.463	3.77232	383.98	86.3514	26.2208	22.084	1.11231	0.0543349	3.84311	22.084	1.11231	0.0543349	3.84311	0.339237	4.00084	0.0452817	1.11231	0.278019	812.81	0.0472896	21.4536	1.62721	3.35122	1.16614	24.3382	7.62394	83.7359		140.433	283.562	540.931	10821.2	0.393599	18.615	0.199534	34.9978	3.56063	22.6434	20.713	122.302	211.19	340.39	877.706
14ZA142-4.1	0.30173	7.49507	953.423	237.63	388.165	3.57902	388.575	3.6886	336.941	47.1312	-15.4908	16.0638	0.935809	0.0568723	1.14895	16.1368	0.94228	0.0532139	2.08024	0.454683	2.2837	0.0619702	0.94228	0.412612	944.752	0.906583	18.8899	2.37994	2.632	0.955269	18.5219	7.62594	89.2427		173.818	361.546	641.497	12355.3	0.417051	6.82289	3.82524	30.8155	5.20775	17.7838	16.9675	93.075	211.245	362.775	1086.36
14ZA142-19.1	0.20997	3.3882	462.304	177.414	413.899	2.83946	413.468	3.03565	480.439	37.0614	14.1205	15.0485	0.689722	0.0567629	1.66806	15.049	0.689825	0.0567389	1.67735	0.519847	1.81366	0.0664497	0.689825	0.380349	1553.11	0.0184294	17.1196	1.28616	4.01506	0.989779	35.7384	13.7897	164.408		299.831	577.034	1043.58	12454.1	0.251868	19.3129	0.0777611	27.9276	2.81435	27.1288	17.5804	179.59	381.986	668.324	1873.95
14ZA142-8.1	0.221274	7.84992	134.239	26.6373	424.449	7.54149	426.326	7.76507	371.98	116.013	-14.3945	14.6607	1.79952	0.0571161	3.09483	14.7165	1.8189	0.0540458	5.15234	0.506361	5.46397	0.0679511	1.8189	0.33289	617.949	0.303018	19.2029	1.00756	1.74161	0.836652	9.54306	4.65299	57.3291		132.483	322.267	590.122	11347.6	0.625569	17.9866	1.27856	31.3261	2.20472	11.7676	14.8606	47.9551	128.892	233.045	828.016
14ZA142-9.1	0.141078	3.28446	232.054	64.2492	501.77	26.9288	502.073	27.7758	477.661	59.7997	-5.16585	12.3364	5.4903	0.0584368	1.94839	12.3633	5.49175	0.0566677	2.70517	0.631978	6.12186	0.0808845	5.49175	0.897071	2609.84	0.0652164	5.48283	1.27459	5.70372	0.993145	61.9564	26.5685	307.928		463.925	709.523	1139.37	10153.9	0.161042	5.83791	0.275175	8.94426	2.78903	38.5386	17.6402	311.339	735.969	1251.74	2899.53
14ZA142-24.1	0.196113	3.0236	720.08	317.749	504.214	4.75722	506.405	5.17009	519.806	30.8831	3.06978	12.2675	0.962269	0.0589479	1.10529	12.2854	0.964117	0.0577624	1.4072	0.648271	1.70579	0.0813973	0.964117	0.565202	2408.63	1.21486	32.5539	6.12375	10.6889	2.48847	69.9706	25.7894	271.921		437.716	753.405	1259.99	10902.8	0.277368	5.73315	5.12601	53.1059	13.3999	72.2226	44.2002	351.611	714.389	1105.37	2735.72
14ZA142-13.1	0.817515	68.8466	277.139	44.3138	525.917	11.0135	536.557	11.1338	605.988	80.1926	13.5279	11.6681	2.13458	0.0645763	2.63677	11.7329	2.1418	0.0600931	3.70762	0.706188	4.28179	0.0852304	2.1418	0.50021	527.921	1.22625	24.5198	3.28729	2.46602	1.14002	10.2633	4.22857	48.9295		110.766	340.425	731.153	13314	0.690747	6.46867	5.17403	39.9997	7.19319	16.6623	20.2489	51.5742	117.135	198.9	692.285
14ZA142-16.1	-0.0430285	-1.53875	438.539	81.8867	544.49	9.22431	544.471	9.31396	483.311	39.608	-12.9788	11.3513	1.73362	0.0580666	1.37988	11.3688	1.73533	0.0568127	1.79349	0.689024	2.49559	0.0879604	1.73533	0.695357	1102.49	0.0482875	7.76069	0.319695	1.45951	0.0902497	14.6773	7.70597	104.898		216.903	424.412	750.989	13956.2	0.0594385	28.0311	0.203745	12.6602	0.699551	9.86158	1.60301	73.7551	213.462	426.414	1355.64
14ZA142-10.1	-0.305111	-5.5619	108.557	38.9187	563.284	5.63024	561.344	5.81302	506.458	73.1831	-11.512	10.985	1.00694	0.0564342	2.79004	10.9719	1.01564	0.0574125	3.32701	0.721484	3.47858	0.091142	1.01564	0.291971	712.632	0.0181017	20.1787	0.376784	1.39532	0.715894	14.2777	5.79353	68.7251		128.747	245.937	433.156	10764.1	0.488913	73.082	0.0763785	32.918	0.824473	9.42782	12.7157	71.7474	160.486	279.37	804.666
14ZA142-5.1	-0.0980432	-7.49332	909.189	76.345	569.176	5.13075	568.44	5.09013	560.225	23.2907	-1.63908	10.8439	0.922213	0.0582823	0.957699	10.8364	0.922898	0.0588398	1.06856	0.748661	1.41194	0.0922811	0.922898	0.65364	332.64	0.0121274	2.80381	0.228431	1.69321	0.0328496	17.8688	6.77513	54.6355		35.2088	24.7267	38.362	13658.1	0.0182044	16.6016	0.0511703	4.57391	0.499849	11.4406	0.583474	89.7931	187.677	222.096	220.055
14ZA142-14.1	0.17813	0.896962	284.595	369.712	569.241	19.7785	568.954	24.5808	266.053	102.509	-117.109	10.8126	3.56229	0.0605371	1.64429	10.9315	3.57118	0.0515849	4.46742	0.650645	5.71937	0.0914788	3.57118	0.624401	1100.73	0.342378	58.1922	3.07446	6.13451	1.49221	40.0867	13.1821	129.985		187.963	301.167	494.906	9535.68	0.29006	23.2327	1.44463	94.9302	6.72749	41.4494	26.5046	201.441	365.154	528.393	1174.77
14ZA142-30.1	0.284586	1.37179	460.273	638.752	911.245	18.8722	909.022	23.2694	979.9	18.5045	7.24835	6.56733	2.14291	0.071818	0.908382	6.56733	2.14291	0.071818	0.908382	1.50781	2.32749	0.152269	2.14291	0.920695	2049.39	0.079223	62.9229	2.28939	5.72876	2.06888	50.6956	18.945	212.636		359.448	639.501	1128	7227.46	0.370057	38.4169	0.334274	102.648	5.0096	38.7078	36.7474	254.752	524.792	864.374	2246.55
14ZA142-6.1	0.551228	13.2623	306.02	87.3046	921.494	10.6451	926.369	10.8924	1042.89	28.3091	12.0366	6.47165	1.19027	0.0743861	1.33677	6.474	1.19083	0.0740846	1.40306	1.57782	1.84028	0.154464	1.19083	0.647088	889.697	0.100912	14.1405	0.737255	2.39251	0.148762	20.8125	8.33911	93.7068		163.907	264.658	465.345	11196.2	0.0642616	22.626	0.425788	23.0676	1.61325	16.1656	2.64231	104.586	231	380.922	1024.42
14ZA142-31.1	0.790043	45.9194	758.756	83.9592	1037.41	17.9544	1043.83	17.5855	1200.31	13.1918	14.0428	5.6821	1.79425	0.0805041	0.632964	5.68438	1.79436	0.0801698	0.669205	1.94459	1.91509	0.175921	1.79436	0.936959	2631.37	2.12937	16.2006	7.27531	12.1569	3.25215	66.8007	24.8068	274.484		486.524	1094.12	2023.89	11345.1	0.347871	2.12239	8.98467	26.4284	15.9197	82.1413	57.7647	335.682	687.169	1115.79	3040.78
14ZA142-26.1	-0.0481255	-0.871048	211.051	79.4661	1074.04	8.93515	1072.43	9.09688	1063.22	24.4695	-1.05663	5.51855	0.856453	0.0748357	1.21647	5.51855	0.856453	0.0748357	1.21647	1.86976	1.48772	0.181207	0.856453	0.575682	1421.26	0.0213217	4.92741	1.14283	3.85012	0.222785	36.0186	14.1563	154.542		252.758	422.005	707.005	11553.6	0.0576679	6.20543	0.0899649	8.03819	2.50073	26.0143	3.9571	180.998	392.142	628.218	1579.74
14ZA142-32.1	0.324719	5.10639	320.608	159.169	1976.49	31.475	1982.9	29.1053	2016.48	10.2195	1.99404	2.778	1.60273	0.124277	0.571731	2.77828	1.60276	0.124188	0.576393	6.16319	1.70325	0.359935	1.60276	0.941	770.77	0.0519547	31.4819	0.570553	1.6728	0.273703	16.7708	6.67292	78.4951		144.489	281.645	510.498	11880.9	0.157518	69.9834	0.219218	51.3571	1.24847	11.3027	4.86151	84.2754	184.845	319.086	903.053
Spot Name	7-corr %com 206	7-corr %com 208	ppm U	ppm Th	207corr 206Pb /238U Age	1s err	208corr 206Pb /238U Age	1s err	204corr 207Pb /206Pb Age	1s err	% Dis- cor- dant	Total 238 /206	% err	Total 207 /206	% err	4corr 238 /206*	% err	4corr 207* /206*	% err	4corr 207* /235	% err	4corr 206* /238	% err	err corr	Y (ppm)	La (ppm)	Ce (ppm)	Nd (ppm)	Sm (ppm)	Eu (ppm)	Gd (ppm)	Tb (ppm)	Dy (ppm)		Er (ppm)	Yb (ppm)	Lu (ppm)	Hf (ppm)	Eu (star)		La (ch)	Ce (ch)	Nd (ch)	Sm (ch)	Eu (ch)	Gd (ch)	Tb (ch)	Dy (ch)	Er (ch)
14ZA121-9.1	1.20437	11.1021	753.984	493.804	220.05	4.56643	221.22	5.32605	47.0612	147.296	-371.804	28.4512	2.09402	0.060195	1.76226	28.9272	2.12059	0.0469778	6.16541	0.223917	6.51991	0.0345695	2.12059	0.325249	1625.81	11.6749	62.7929	12.2347	9.41799	1.81777	51.2232	16.749	178.045		270.952	417.879	710.564	8826.24	0.252276	2.6945	49.2612	102.435	26.7719	63.6351	32.2872	257.403	463.96	723.759	1693.45
14ZA121-18.1	19.5376	76.101	927.565	599.814	222.522	4.24637	228.57	5.95203	421.676	387.685	47.7416	22.9098	1.84456	0.206859	1.76431	28.3075	2.13022	0.0552573	17.3684	0.269146	17.4985	0.0353263	2.13022	0.121737	2140.86	59.6875	183.616	66.0766	27.9872	8.41642	81.1364	24.4935	239.603		362.319	686.705	1235.54	10966.3	0.53838	1.51116	251.846	299.537	144.588	189.102	149.492	407.721	678.492	973.995	2264.49
14ZA121-3.1	0.143769	2.01222	439.099	209.026	252.698	5.96044	253.808	6.41344	328.756	54.4632	23.4247	24.9776	2.38463	0.0524376	2.1164	24.9594	2.38591	0.0530221	2.40035	0.292903	3.38442	0.0400651	2.38591	0.70497	921.674	0.700063	19.7655	1.13493	2.7534	0.308802	23.0275	8.80721	98.2753		167.483	285.417	493.566	9865.34	0.118215	11.8603	2.95385	32.2439	2.48344	18.6041	5.48494	115.716	243.967	399.493	1046.77
14ZA121-11.1	1.19108	18.7465	896.427	477.626	253.147	1.51135	261.489	1.71743	183.486	109.236	-38.4541	24.671	0.594841	0.0608375	1.40896	25.0158	0.653218	0.049775	4.68967	0.274346	4.73494	0.0399748	0.653218	0.137957	1058.16	11.9609	68.4565	19.2916	12.8925	4.00198	39.0887	10.6477	101.467		183.556	440.765	912.454	12568.5	0.543412	2.40985	50.4679	111.675	42.2137	87.1117	71.0831	196.426	294.951	412.466	1147.23
14ZA121-2.1	0.00702191	0.0549191	322.477	270.071	254.821	5.52567	255.632	6.3722	254.492	61.7915	-0.130871	24.7993	2.18966	0.0513895	2.63773	24.8013	2.18989	0.0513259	2.68732	0.28534	3.4666	0.0403205	2.18989	0.631712	916.174	0.0532296	69.6791	0.812754	2.24641	0.67694	20.841	8.52797	97.0223		169.012	308.041	529.129	11008.4	0.301575	113.496	0.224597	113.669	1.77846	15.1784	12.0238	104.729	236.232	394.4	1056.33
14ZA121-12.1	-0.108398	-1.24815	528.812	291.02	258.78	1.85189	258.217	1.94703	187.428	96.5129	-38.5693	24.4406	0.682527	0.0505531	3.87577	24.4617	0.687379	0.0498593	4.14646	0.281035	4.20305	0.0408802	0.687379	0.163543	1711.25	0.173518	19.4758	2.72561	6.04037	1.25118	45.7228	17.5902	185.68		305.077	495.811	856.363	9370.5	0.229494	9.48926	0.732142	31.7714	5.96413	40.8133	22.2234	229.763	487.263	754.797	1906.73
14ZA121-17.1	-0.0626081	-1.17643	457.155	162.328	261.479	1.83164	261.895	1.92232	266.889	56.0657	2.0537	24.1722	0.696644	0.0509804	2.12933	24.1534	0.701253	0.0516037	2.44376	0.29458	2.54239	0.041402	0.701253	0.275825	1433.71	0.0280853	15.1754	1.42924	3.43933	0.876661	29.2645	11.941	143.198		272.729	503.182	911.496	9064.44	0.266362	15.2535	0.118503	24.756	3.12743	23.2387	15.5712	147.058	330.775	582.106	1704.56
14ZA121-10.1	0.0581273	0.297679	170.126	204.098	262.59	2.47504	260.123	3.27464	25.1156	188.551	-958.489	24.0388	0.926803	0.051973	3.54705	24.2015	1.00588	0.0465492	7.85959	0.265198	7.9237	0.0413197	1.00588	0.126946	1224.23	0.0478024	67.5986	1.574	4.78417	1.45214	37.5406	13.0271	136.523		214.92	372.26	627.176	9589.73	0.330295	60.4928	0.201698	110.275	3.4442	32.3255	25.7928	188.646	360.862	554.97	1343.25
14ZA121-4.1	0.261464	1.72025	202.924	201.158	270.633	4.61601	272.077	5.53379	470.393	100.52	43.0189	23.2623	1.71626	0.0537846	3.0802	23.1839	1.73384	0.0564818	4.54153	0.335911	4.86124	0.0431335	1.73384	0.356666	1883.09	0.0415299	55.8584	1.76034	4.81949	2.07546	41.8879	16.9352	192.195		358.772	640.522	1134.26	9762.51	0.445265	45.2539	0.175232	91.123	3.85196	32.5641	36.8643	210.492	469.118	781.28	2242.33
14ZA121-8.1	0.414745	3.86619	438.08	292.431	273.668	3.02275	273.781	3.53491	-361.859	228.064	178.283	22.9635	1.11033	0.0550829	2.08755	23.4015	1.18248	0.039849	8.81244	0.234788	8.89142	0.0427324	1.18248	0.132991	642.06	1.20315	38.7582	1.685	2.25003	0.836456	12.3325	5.03455	57.9871		120.711	286.942	569.955	12015.4	0.48403	14.4293	5.0766	63.227	3.6871	15.2029	14.8571	61.9723	139.461	235.72	754.444
14ZA121-14.1	-0.0865512	-0.944012	760.73	435.412	280.099	3.71961	279.077	4.06665	248.181	36.1499	-13.0414	22.5378	1.34283	0.0512076	1.55996	22.5385	1.34287	0.0511853	1.57037	0.313128	2.06625	0.0443686	1.34287	0.64991	1047.66	0.137853	78.5263	0.961568	2.26971	1.1263	20.3002	7.49068	91.3632		192.347	429.517	798.684	11346	0.505788	95.3938	0.581657	128.102	2.10409	15.3359	20.0054	102.011	207.498	371.395	1202.17
14ZA121-16.1	0.6066	42.7527	152.191	45.3715	560.274	14.2659	581.015	14.6674	530.04	107.136	-5.8509	10.9463	2.60419	0.0637873	2.43896	11.024	2.62027	0.0580326	4.89019	0.72583	5.54795	0.0907114	2.62027	0.472295	216.524	0.756385	2.54058	0.483465	0.473316	0.26441	3.14634	1.30437	17.587		40.7351	111.282	224.506	12250	0.660463	1.95063	3.1915	4.1445	1.05791	3.19808	4.69645	15.8108	36.1322	71.4917	254.594
14ZA121-6.1	0.140569	1.88245	226.822	110.413	597.235	7.65943	597.327	8.12504	613	48.7828	2.64051	10.287	1.30889	0.0609993	1.94031	10.296	1.31147	0.0602884	2.25807	0.807362	2.61129	0.0971255	1.31147	0.502231	966.242	0.0222374	9.31175	0.765843	2.58226	0.0858215	22.736	9.11082	102.459		175.318	294.645	491.217	13587.5	0.034142	17.1679	0.0938287	15.1905	1.67581	17.4477	1.52436	114.251	252.377	416.502	1095.73
14ZA121-15.1	2.78957	50.521	569.831	131.875	649.104	6.99447	653.365	7.30576	907.002	60.6843	29.1885	9.17632	1.10364	0.0841704	0.966915	9.34751	1.12732	0.0693072	2.94561	1.02231	3.15396	0.10698	1.12732	0.357431	567.709	0.721004	41.7208	0.962878	1.29482	0.526477	9.70579	4.44411	53.9152		109.859	258.51	465.306	12674.8	0.452699	26.4353	3.04221	68.06	2.10695	8.74875	9.35128	48.7728	123.106	219.167	686.621
14ZA121-13.1	0.0531314	0.653454	197.073	104.67	818.203	6.43293	816.252	7.23635	788.677	42.1028	-3.86988	7.38539	0.802573	0.066843	1.56464	7.39762	0.808245	0.0654736	2.00576	1.22032	2.16248	0.135179	0.808245	0.373758	1065.75	1.1979	15.3343	1.58595	2.3702	1.03757	18.8317	6.95584	87.4512		197.831	487.841	1004.11	9531.64	0.473403	5.86879	5.05445	25.0151	3.47035	16.0148	18.4294	94.6316	192.683	355.493	1236.44
14ZA121-7.1	5.54398	254.604	1146.98	101.07	947.589	29.4122	990.701	30.5096	1667.43	73.2816	44.2364	5.96509	3.21515	0.116913	0.433368	6.07496	3.25407	0.102409	3.96163	2.32432	5.12674	0.16461	3.25407	0.634724	3061.77	93.225	199.64	90.7469	68.3079	55.2419	259.686	72.7618	567.526		515.984	919.454	1518.46	10784.4	1.26432	1.1004	393.355	325.677	198.571	461.54	981.206	1304.95	2015.56	2307.02	3224.9
14ZA121-19.1	0.490577	9.64431	120.601	42.051	1025.9	52.8373	1030.1	53.5491	1106.64	39.4265	7.55906	5.76851	5.33965	0.0775722	1.66462	5.77611	5.34047	0.0764743	1.97278	1.8255	5.69319	0.173127	5.34047	0.938044	1176.96	0.0654847	6.04345	2.77607	6.53873	0.622881	47.7374	15.1203	150.387		195.303	274.058	446.946	9305.37	0.107468	3.10472	0.276307	9.85881	6.07454	44.1806	11.0636	239.886	418.844	611.33	1220.64
14ZA121-1.1	0.289373	3.33329	287.946	164.054	1031.14	5.23816	1029.25	5.48226	1057.79	46.5843	2.61174	5.74835	0.5	0.0760788	1.82544	5.7583	0.514742	0.0746341	2.314	1.78708	2.37056	0.173662	0.514742	0.21714	3915.02	0.800405	4.65671	4.56889	11.0358	0.413227	99.3492	35.7802	425.041		764.504	1240.23	2068.91	11826.2	0.0380411	1.13595	3.37723	7.59659	9.99757	74.5664	7.33974	499.242	991.14	1727.81	4778.15
14ZA121-5.1	0.398705	4.93737	178.944	100.626	1036.14	8.60492	1040.43	9.02507	1124.92	28.0632	8.17617	5.71211	0.851571	0.0771779	1.408	5.71211	0.851571	0.0771779	1.408	1.86294	1.64549	0.175067	0.851571	0.517518	644.051	0.0092606	27.7234	0.352308	1.37402	0.166909	12.5654	5.08305	63.8227		122.224	241.776	420.58	12855.5	0.122446	111.67	0.0390743	45.2258	0.770914	9.28389	2.96464	63.1427	140.805	259.442	763.902
Spot Name	7-corr %com 206	7-corr %com 208	ppm U	ppm Th	207corr 206Pb /238U Age	1s err	208corr 206Pb /238U Age	1s err	204corr 207Pb /206Pb Age	1s err	% Dis- cor- dant	Total 238 /206	% err	Total 207 /206	% err	4corr 238 /206*	% err	4corr 207* /206*	% err	4corr 207* /235	% err	4corr 206* /238	% err	err corr	Y (ppm)	La (ppm)	Ce (ppm)	Nd (ppm)	Sm (ppm)	Eu (ppm)	Gd (ppm)	Tb (ppm)	Dy (ppm)		Er (ppm)	Yb (ppm)	Lu (ppm)	Hf (ppm)	Eu (star)	Ce /Ce*	La (ch)	Ce (ch)	Nd (ch)	Sm (ch)	Eu (ch)	Gd (ch)	Tb (ch)	Dy (chn)	Er (ch)
12ZA23-13.1	0.270961	2.28861	251.17	184.107	248.914	1.73756	248.47	1.99707	356.504	68.3099	30.5493	25.3325	0.696263	0.0533717	1.81924	25.3229	0.715105	0.0536761	3.02547	0.29226	3.10884	0.03949	0.715105	0.230023	1908.01	5.65471	24.2857	11.2831	14.8301	5.37442	83.9103	22.5245	220.773		311.839	468.51	84.2498	4828.98	0.464409	1.63231	23.8595	39.6177	24.6895	100.203	95.4603	421.66	623.946	897.45	1948.99
12ZA23-32.1	0.498968	3.95085	234.639	173.452	249.434	3.58714	247.622	4.14627	172.081	149.893	-45.5228	25.221	1.4463	0.0552095	2.44064	25.4006	1.49005	0.0495321	6.42172	0.268871	6.59233	0.0393691	1.49005	0.226029	1560.87	1.41099	17.8128	8.55649	13.0444	4.93449	73.2162	19.2778	174.088		260.455	390.388	69.1056	3906.12	0.486717	2.75229	5.95355	29.0584	18.7232	88.1377	87.6464	367.921	534.012	707.674	1627.85
12ZA23-12.1	0.941623	13.9271	96.2265	38.9653	250.093	6.55845	251.253	7.02935	437.212	195.449	43.3172	25.0413	2.64724	0.0587698	2.80443	25.14	2.70941	0.0556437	8.7799	0.305178	9.18845	0.0397773	2.70941	0.294872	502.1	0.92797	4.40407	1.19263	1.95582	0.493191	14.6343	4.6136	52.8849		87.7325	148.445	27.6419	7350.8	0.281005	2.24753	3.91548	7.18445	2.60969	13.215	8.76005	73.5392	127.8	214.979	548.328
12ZA23-5.1	8.94684	49.8741	77.3963	42.1431	254.133	2.89404	250.373	5.69681	579.572	483.431	56.8224	22.6445	1.07583	0.122994	2.46495	24.6197	1.93882	0.0593653	22.252	0.332469	22.3363	0.0406178	1.93882	0.086801	612.844	1.11476	8.85759	2.97454	3.89504	1.34133	23.3194	6.95221	70.3541		106.12	177.039	32.8639	8157.37	0.429012	2.61148	4.70364	14.4496	6.50883	26.3178	23.8246	117.183	192.582	285.992	663.253
12ZA23-9.1	-0.106304	-1.01788	206.844	135.925	256.646	7.92668	255.831	8.82534	207.813	119.653	-23.8036	24.6475	3.12573	0.0505222	2.03053	24.6543	3.13982	0.0502987	5.1598	0.281297	6.04003	0.0405608	3.13982	0.519835	1424.79	0.0611312	12.8514	5.23859	7.97815	1.87697	56.6986	16.0614	165.289		240.474	370.586	66.9227	6295.2	0.269011	12.1923	0.257937	20.9648	11.463	53.9064	33.3388	284.918	444.915	671.906	1502.96
12ZA23-38.1	1.36121	11.694	231.012	141.689	256.853	2.05479	254.472	2.37129	162.982	206.116	-58.3505	24.2661	0.785135	0.0622855	2.54243	24.6636	0.932457	0.0493396	8.81565	0.275829	8.86483	0.0405456	0.932457	0.105186	625.991	1.46992	17.0744	3.4216	4.34233	1.15495	22.7446	6.59248	61.3362		108.305	179.219	32.2003	6067.8	0.354253	4.08748	6.2022	27.8538	7.4871	29.3401	20.5143	114.295	182.617	249.334	676.904
12ZA23-1.1	0.0536496	0.229	605.282	886.089	257.371	4.34209	255.55	5.82785	316.816	37.1161	19.0028	24.5373	1.70671	0.0518201	1.33032	24.509	1.70793	0.0527441	1.63234	0.296722	2.36253	0.0408014	1.70793	0.722923	1646.36	0.111474	60.2165	5.42778	9.63395	1.67536	68.5492	19.6133	193.148		271.96	396.722	70.2171	6734.13	0.198725	41.5613	0.470354	98.2324	11.877	65.0942	29.7577	344.468	543.305	785.156	1699.75
12ZA23-7.1	0.162381	1.01992	707.606	697.245	257.425	7.75835	256.178	9.23269	238.951	40.487	-7.83158	24.5053	3.05197	0.0526926	1.04765	24.5578	3.05323	0.0509806	1.75584	0.286231	3.5221	0.0407203	3.05323	0.866878	2911.03	0.716754	72.2678	10.5903	17.9913	3.29659	118.07	34.2808	350.4		480.451	712.899	122.606	6092.3	0.218028	14.0824	3.02428	117.892	23.1735	121.563	58.5539	593.317	949.607	1424.39	3002.82
12ZA23-25.1	0.422222	5.14553	73.2506	37.5403	259.558	5.2237	260.037	5.7066	214.272	336.82	-21.4124	24.2367	2.01509	0.0548228	4.5061	24.3698	2.19097	0.0504391	14.5418	0.285375	14.706	0.0410344	2.19097	0.148985	526.474	0.0622169	5.92325	1.6599	3.24561	1.21637	20.3012	6.14179	56.9206		95.5374	162.082	29.662	6658.21	0.456776	9.89548	0.262518	9.66272	3.63216	21.9298	21.6051	102.016	170.133	231.385	597.109
12ZA23-11.1	0.0725156	1.18267	625.053	239.258	260.279	6.45215	260.018	6.84539	282.499	33.9858	7.968	24.2531	2.51001	0.0520364	1.23031	24.2555	2.51059	0.0519565	1.48552	0.295345	2.91716	0.0412277	2.51059	0.860627	1134.74	0.181027	15.3826	0.981534	2.55518	0.221653	24.0556	8.58961	104.525		197.82	362.267	65.5604	10405.2	0.0861795	19.592	0.763827	25.094	2.14778	17.2647	3.937	120.883	237.939	424.9	1236.37
12ZA23-4.1	0.097691	0.677467	419.831	383.658	260.432	5.81828	260.164	6.80952	289.545	57.8172	10.1853	24.2324	2.26109	0.0522416	1.51531	24.2362	2.26493	0.0521168	2.53039	0.296493	3.39599	0.0412606	2.26493	0.666941	1060.89	0.0920145	33.2811	3.58997	5.93491	0.280648	39.9239	11.4344	116.262		183.916	286.735	51.6008	6225.25	0.0555761	31.0882	0.388247	54.2921	7.85552	40.1007	4.98488	200.623	316.743	472.609	1149.47
12ZA23-16.1	0.113711	1.33148	705.19	380.645	262.082	4.84808	262.019	5.27717	287.047	32.4724	8.81089	24.0729	1.87292	0.0524071	1.02364	24.0833	1.874	0.0520599	1.42053	0.298049	2.35155	0.0415225	1.874	0.796922	2403.91	0.313001	20.3637	3.89228	8.20734	0.843262	63.945	21.5622	238.947		411.381	668.631	116.501	8568.99	0.112204	9.90498	1.32068	33.2197	8.51702	55.455	14.978	321.332	597.291	971.329	2571.13
12ZA23-29.1	9.16963	36.7987	454.335	469.044	262.175	11.1664	258.365	13.2517	#NUM!	#NUM!	#NUM!	21.8825	2.86514	0.124993	18.7931	25.2133	3.01106	0.0141771	198.618	0.0775278	198.641	0.0396615	3.01106	0.0151583	1938.13	18.7028	64.4472	15.1923	14.7515	3.02643	79.9105	22.5357	191.973		319.876	526.657	92.2855	6004.88	0.268695	2.05263	78.9146	105.134	33.2436	99.6725	53.7555	401.56	624.259	780.376	1999.23
12ZA23-24.1	0.215395	1.32211	718.059	703.62	262.829	7.75442	260.285	9.21817	331.18	43.1699	20.907	23.9787	2.98765	0.0532389	1.45479	23.9835	2.98875	0.0530788	1.90344	0.305148	3.5434	0.0416954	2.98875	0.843468	2576.55	0.328016	111.298	9.65009	18.3257	0.901905	116.939	34.2879	306.464		456.369	671.079	119.279	5743.87	0.0593882	33.585	1.38403	181.563	21.1162	123.822	16.0196	587.633	949.805	1245.79	2852.31
12ZA23-6.1	0.0540032	0.526981	649.09	413.491	263.97	4.49508	263.192	4.98081	206.542	43.2641	-28.1761	23.9115	1.72368	0.051971	1.18078	23.9622	1.72594	0.0502712	1.86525	0.289264	2.54126	0.0417324	1.72594	0.679165	3723.42	1.16546	26.4209	8.54374	16.7326	3.34691	122.231	38.8884	410.56		605.641	915.167	155.594	7932.49	0.225591	4.49517	4.91757	43.101	18.6953	113.058	59.4477	614.225	1077.24	1668.94	3785.25
12ZA23-8.1	0.0248609	0.189826	852.679	713.738	264.434	4.12569	264.342	4.74746	248.531	33.0465	-6.48382	23.8757	1.57941	0.0517478	1.04663	23.8922	1.58063	0.0511931	1.43564	0.295431	2.13529	0.0418547	1.58063	0.74024	4514.86	1.32452	30.9442	9.9223	22.1043	4.38101	163.772	48.8729	500.273		710.934	1060.71	180.515	8274.94	0.221955	4.58264	5.58868	50.4799	21.7118	149.353	77.8154	822.973	1353.82	2033.63	4443.34
12ZA23-14.1	0.35043	2.13139	493.731	486.313	264.45	4.11451	262.012	4.91472	255.325	60.7484	-3.62144	23.7964	1.57337	0.0543579	1.45536	23.8862	1.57934	0.0513445	2.64235	0.296379	3.07836	0.0418652	1.57934	0.513044	2349.11	2.0784	27.5831	7.35992	13.1765	3.53621	89.8731	25.8889	268.168		387.062	583.774	104.055	6774.03	0.313237	3.78628	8.76963	44.9969	16.1049	89.0302	62.8102	451.624	717.145	1090.11	2419.14
12ZA23-3.1	0.107091	0.952019	1161.84	811.573	265.049	4.51664	264.267	5.08741	286.036	25.1465	7.43424	23.7995	1.72575	0.0524208	0.872915	23.8109	1.72628	0.0520369	1.09985	0.301326	2.04688	0.0419975	1.72628	0.843371	3541.49	0.0801715	70.3986	6.22009	14.0368	1.49416	115.791	37.7728	401.557		599.782	911.168	153.12	9459.51	0.112973	53.5214	0.338277	114.843	13.6107	94.8431	26.5392	581.866	1046.34	1632.35	3748.64
12ZA23-10.1	0.312188	4.67867	587.517	243.043	265.071	3.63606	265.253	3.87559	283.086	48.0997	6.44798	23.7486	1.3875	0.0540654	1.21676	23.8109	1.39175	0.0519698	2.10266	0.300937	2.52154	0.0419975	1.39175	0.551945	1593.97	0.206849	21.0691	1.40893	3.51944	0.567924	32.1171	12.0761	150.93		287.138	518.098	95.7652	9036.41	0.16283	20.953	0.87278	34.3705	3.083	23.78	10.0875	161.393	334.518	613.535	1794.61
12ZA23-2.1	0.133699	1.05076	229.804	180.653	265.267	4.12314	264.21	4.75843	246.42	130.123	-7.75051	23.7732	1.56915	0.052639	2.05763	23.8175	1.6043	0.0511461	5.65079	0.296086	5.87412	0.0419859	1.6043	0.273114	1357.06	0.261182	19.0582	6.08856	8.81444	2.70091	57.6402	16.1341	160.62		231.965	363.808	65.637	7041.62	0.365258	8.11381	1.10203	31.09	13.3229	59.557	47.9736	289.649	446.928	652.929	1449.78
12ZA23-22.1	0.0994943	0.778967	290.856	227.027	265.721	5.15022	264.172	5.89509	315.212	67.1715	15.9078	23.7399	1.95821	0.052375	2.30286	23.73	1.96206	0.0527069	2.95331	0.306246	3.54567	0.0421407	1.96206	0.55337	770.921	0.397895	22.7282	2.54884	4.06671	0.949037	27.4583	9.00637	89.5545		140.098	222.495	40.8335	5689.72	0.273762	12.1166	1.67888	37.0769	5.57733	27.4778	16.8568	137.981	249.484	364.043	875.611
12ZA23-21.1	-0.0167814	-0.0706543	771.27	1135.48	266.183	2.21035	263.4	3.02567	266.083	37.7693	-0.0380734	23.7254	0.836192	0.0514533	1.46359	23.7215	0.837624	0.0515855	1.64603	0.299839	1.8469	0.0421559	0.837624	0.453531	1732.13	0.0735818	67.4781	4.28661	9.1314	1.49622	70.0459	21.1676	190.097		306.645	436.671	75.1996	6960.21	0.180337	64.5048	0.310472	110.078	9.3799	61.6987	26.5759	351.99	586.36	772.754	1916.53
12ZA23-31.1	2.95232	17.2976	1301.66	1155.51	267.172	1.49113	265.006	1.83444	346.123	84.7052	23.1105	22.9341	0.559284	0.0752799	0.869756	23.5782	0.606861	0.0534301	3.74474	0.312448	3.79359	0.0424121	0.606861	0.15997	4875.04	7.23712	146.425	25.1709	35.9074	5.56688	207.173	59.8967	506.359		838.844	1185.95	195.34	6632.04	0.196745	5.82446	30.5364	238.867	55.0785	242.618	98.8789	1041.07	1659.19	2058.37	5242.77
12ZA23-33.1	0.103089	1.1167	620.759	341.239	268.137	1.70436	266.489	1.88632	311.106	41.0257	13.9955	23.5207	0.635732	0.0524583	1.58554	23.5162	0.638275	0.0526119	1.80245	0.308474	1.91212	0.0425239	0.638275	0.333805	1231.04	0.0664467	29.7221	1.74369	4.03682	0.308282	34.6815	12.5975	133.256		217.814	336.206	58.4471	7277.14	0.0794196	46.8791	0.280366	48.4863	3.81552	27.2758	5.47569	174.279	348.962	541.692	1361.33
12ZA23-36.1	0.0247904	0.163346	460.737	422.753	268.707	2.421	266.064	3.08761	265.077	67.6476	-1.3877	23.4882	0.904366	0.0518434	1.94689	23.4964	0.915395	0.0515629	2.94762	0.302579	3.08649	0.0425598	0.915395	0.296581	1923.42	0.192146	35.7973	6.17799	12.1459	2.25281	77.2714	22.3529	198.712		328.793	504.983	86.1328	6525.98	0.224155	17.6394	0.810743	58.3969	13.5186	82.0671	40.0144	388.298	619.195	807.773	2054.96
12ZA23-15.1	-0.0437028	-0.441142	203.272	127.422	269.215	5.24962	268.685	5.80231	297.481	71.0406	9.62886	23.4589	1.97182	0.0513056	2.06168	23.4299	1.97788	0.0522983	3.11354	0.307764	3.68865	0.0426805	1.97788	0.536206	1761.72	0.173009	11.2182	6.91119	11.8196	4.36338	71.2041	20.2809	202.377		294.354	461.753	83.6201	6719.91	0.458477	5.50787	0.729997	18.3005	15.1229	79.8625	77.5023	357.809	561.798	822.669	1839.71
12ZA23-34.1	0.135034	1.0371	793.422	644.435	269.674	5.08786	268.915	5.87324	310.599	37.7565	13.3526	23.3764	1.90988	0.0527491	1.4027	23.3807	1.91075	0.0526002	1.65866	0.310192	2.53024	0.0427703	1.91075	0.755165	3102.37	0.0904903	23.1691	5.46918	14.0423	2.4941	103.276	35.4495	343.998		529.828	811.88	138.612	7342.27	0.199638	17.6815	0.381816	37.7962	11.9676	94.8805	44.3001	518.975	981.981	1398.37	3311.43
12ZA23-30.1	0.910838	7.76356	279.276	199.285	269.943	2.02686	270.517	2.36049	349.786	118.981	23.1298	23.1712	0.743867	0.0589761	2.16213	23.3304	0.80719	0.0535168	5.26347	0.316278	5.325	0.0428626	0.80719	0.151585	2100.39	0.964432	22.4328	11.0737	16.9228	6.14256	92.827	27.0685	252.048		375.985	572.782	100.427	6162.81	0.472416	3.6853	4.06933	36.5951	24.2314	114.343	109.104	466.467	749.819	1024.59	2349.9
12ZA23-26.1	2.12132	12.3074	402.885	372.746	271.232	1.85948	268.03	2.32492	84.5356	182.718	-223.943	22.7771	0.678712	0.0687129	1.70153	23.3861	0.80404	0.0477232	7.702	0.281366	7.74386	0.0427604	0.80404	0.103829	2054.77	30.6718	63.8288	14.8704	16.8477	3.78509	93.1796	26.5846	236.417		352.479	520.29	89.2355	5438.9	0.291203	1.60457	129.417	104.125	32.5392	113.836	67.2308	468.239	736.416	961.045	2202.99
12ZA23-23.1	0.202222	1.40805	264.213	221.584	274.21	2.88201	270.725	3.39545	260.901	104.838	-5.17147	22.966	1.0537	0.0533907	2.36162	23.0211	1.08223	0.0514692	4.56467	0.308263	4.69121	0.0434383	1.08223	0.230693	2482.48	0.432372	22.6939	13.6499	22.3735	9.15923	120.989	32.8991	289.397		439.719	635.325	108.075	6057.16	0.536621	5.0152	1.82435	37.0211	29.8684	151.173	162.686	607.986	911.333	1176.41	2748.24
12ZA23-27.1	-0.0104771	-0.166437	835.608	322.221	276.438	1.64136	275.569	1.74331	277.643	33.8406	0.440062	22.8255	0.595744	0.051735	1.33656	22.8224	0.597166	0.0518464	1.47788	0.313227	1.59397	0.0438166	0.597166	0.374641	708.113	0.0178375	18.8513	0.455416	1.52797	0.193472	13.3765	5.30043	58.388		132.001	283.699	52.7474	10309.9	0.130448	112.291	0.0752637	30.7526	0.996534	10.3241	3.43645	67.2188	146.826	237.349	825.009
12ZA23-28.1	-0.12732	-1.12413	565.448	397.168	282.438	3.07026	280.855	3.83938	244.794	51.7018	-15.5958	22.3563	1.09712	0.0509334	1.69228	22.3514	1.10117	0.0511101	2.24457	0.315285	2.50014	0.04474	1.10117	0.440443	3104.2	0.116704	19.0572	6.93227	14.2524	3.54908	103.812	34.5395	426.301		512.088	782.302	133.903	7396.52	0.281252	11.3749	0.492423	31.0884	15.1691	96.2999	63.0386	521.671	956.774	1732.93	3200.55
12ZA23-37.1	0.630007	4.75279	255.65	190.296	283.272	2.42178	279.749	2.86594	419.754	114.66	32.9615	22.1204	0.842508	0.0570297	2.86084	22.1709	0.890946	0.0552097	5.1351	0.343348	5.21181	0.0451043	0.890946	0.170947	2001.97	43.2103	63.0123	19.5385	17.1501	7.96572	93.8551	25.2751	223.574		343.99	523.588	92.9476	5377.92	0.605218	1.16428	182.322	102.793	42.7538	115.879	141.487	471.634	700.14	908.837	2149.94
12ZA23-35.1	0.0582876	0.344057	410.641	424.746	469.703	3.14529	463.923	3.82802	481.656	38.0475	2.53644	13.2228	0.676742	0.056937	1.45692	13.2255	0.679743	0.0567702	1.72234	0.591846	1.85163	0.0756113	0.679743	0.367106	2109.72	0.104354	44.902	5.06426	11.397	3.70369	66.9944	19.8776	177.511		353.487	608.252	104.347	8039.36	0.408573	33.1608	0.440311	73.2496	11.0815	77.0069	65.785	336.655	550.626	721.588	2209.29
Spot Name	7-corr %com 206	7-corr %com 208	ppm U	ppm Th	207corr 206Pb /238U Age	1s err	208corr 206Pb /238U Age	1s err	204corr 207Pb /206Pb Age	1s err	% Dis- cor- dant	Total 238 /206	% err	Total 207 /206	% err	4corr 238 /206*	% err	4corr 207* /206*	% err	4corr 207* /235	% err	4corr 206* /238	% err	err corr	Y (ppm)	La (ppm)	Ce (ppm)	Nd (ppm)	Sm (ppm)	Eu (ppm)	Gd (ppm)	Tb (ppm)	Dy (ppm)		Er (ppm)	Yb (ppm)	Lu (ppm)	Hf (ppm)	Eu (star)	Ce /Ce*	La (ch)	Ce (ch)	Nd (ch)	Sm (ch)	Eu (ch)	Gd (ch)	Tb (ch)	Dy (chn)	Er (ch)
12ZA54-7.1	2.97932	21.6056	238.213	159.304	215.027	7.85499	213.436	9.13496	294.101	221.188	27.1758	28.604	3.68746	0.0742706	2.08947	29.4172	3.73626	0.0522209	9.68829	0.244762	10.3838	0.0339937	3.73626	0.359818	674.621	0.960425	27.2924	2.20758	2.97535	0.827043	17.4451	6.03826	66.5967		113.557	201.821	37.5985	9191.12	0.349922	10.0629	4.05243	44.5226	4.83058	20.1037	14.6899	87.6638	167.265	270.718	709.728
12ZA54-5.1	0.181153	0.717625	613.488	981.292	241.484	8.5611	241.077	11.8422	301.006	45.7272	20.0121	26.1506	3.58702	0.0524869	1.47809	26.1541	3.58811	0.0523792	2.00538	0.276134	4.11049	0.0382349	3.58811	0.872917	1745.11	2.61337	88.382	8.96904	12.5785	5.18466	63.5544	17.5969	177.157		277.767	524.72	99.2412	7133.05	0.558961	9.80081	11.0269	144.18	19.6259	84.99	92.0898	319.369	487.45	720.152	1736.05
12ZA54-12.1	0.100926	0.547819	339.387	391.126	256.615	6.81434	255.487	8.43578	305.008	73.3515	16.0685	24.5994	2.68707	0.052182	1.81152	24.5905	2.69276	0.0524712	3.21916	0.294208	4.1969	0.0406661	2.69276	0.641609	1624.45	1.1597	39.093	5.13014	8.12655	2.86733	53.5488	16.2188	167.382		260.422	450.029	81.9818	7914.21	0.418985	8.60464	4.89325	63.7732	11.2257	54.9091	50.9294	269.089	449.274	680.414	1627.63
12ZA54-6.1	0.324785	2.27943	449.137	411.984	258.425	4.18468	259.407	4.93685	294.911	59.6949	12.5311	24.369	1.63722	0.0540164	1.48519	24.4232	1.64302	0.0522394	2.61508	0.294915	3.08839	0.0409447	1.64302	0.531999	1744.51	2.36129	63.1654	8.60339	11.1357	4.25344	60.0485	17.8945	185.09		289.448	530.077	98.7295	10289.7	0.501396	7.52388	9.96325	103.043	18.8258	75.2409	75.5496	301.751	495.693	752.399	1809.05
12ZA54-14.1	0.260195	1.48023	479.301	526.785	260.053	5.15598	259.351	6.51282	345.935	54.1657	25.1446	24.229	2.00615	0.0535355	1.45472	24.2323	2.01016	0.0534257	2.39453	0.303988	3.12643	0.0412672	2.01016	0.642958	1968.15	0.354284	56.2989	7.16454	11.1487	4.14154	65.1549	19.1155	191.623		322.64	601.47	111.439	8280.36	0.46841	18.9715	1.49487	91.8415	15.6773	75.3288	73.562	327.411	529.516	778.956	2016.5
12ZA54-8.1	0.0380323	0.311311	763.968	609.349	261.309	1.60205	262.037	2.91757	323.807	47.1551	19.5509	24.1639	0.615627	0.0517832	1.27472	24.13	0.625351	0.0529066	2.07644	0.302311	2.16856	0.0414422	0.625351	0.288372	1996.72	0.330315	70.8545	3.61885	7.28488	2.1683	54.0546	17.6741	200.478		341.906	630.914	115.188	11356.9	0.333074	34.7928	1.39374	115.586	7.91871	49.2222	38.5134	271.631	489.587	814.952	2136.91
12ZA54-11.1	-0.24172	-2.34696	254.082	168.378	261.66	4.94367	261.129	5.49197	221.229	96.4296	-18.5174	24.1983	1.9096	0.0495489	2.13115	24.1669	1.92312	0.0505909	4.16852	0.288637	4.59074	0.0413789	1.92312	0.418913	624.862	0.0108676	34.0593	0.606434	1.69659	0.496387	15.1056	5.25242	60.4383		108.122	207.103	38.7495	11060.7	0.298889	225.241	0.045855	55.5617	1.32699	11.4635	8.81681	75.9078	145.497	245.684	675.762
12ZA54-15.1	0.0447336	0.217631	707.223	937.258	263.418	3.43883	263.855	4.69224	285.434	38.1945	7.81483	23.9649	1.32032	0.0518842	1.22189	23.9608	1.32241	0.0520232	1.67036	0.299363	2.13046	0.0417349	1.32241	0.620714	2381.08	0.342449	62.2393	6.25473	10.9646	4.45699	71.5409	22.3613	232.14		379.521	715.135	136.32	8577.14	0.485083	22.8315	1.44493	101.532	13.6865	74.0854	79.165	359.502	619.428	943.66	2372.01
12ZA54-16.1	0.148074	0.810873	362.336	421.639	266.367	3.33413	266.338	4.17578	347.873	58.3817	23.7374	23.6696	1.26349	0.052779	1.69079	23.6492	1.27034	0.0534715	2.5818	0.311751	2.87741	0.0422848	1.27034	0.441487	1961.53	0.146037	53.3781	4.71714	8.62179	3.04477	57.2409	17.825	188.836		326.927	584.201	109.063	9003.71	0.417784	34.5274	0.61619	87.0768	10.322	58.2554	54.0812	287.643	493.767	767.625	2043.29
12ZA54-9.1	0.136673	0.675546	615.748	797.758	269.068	3.16358	269.262	4.12825	301.664	42.7693	10.9499	23.4297	1.18834	0.0527486	1.33195	23.4401	1.19143	0.0523943	1.87588	0.308196	2.22226	0.042662	1.19143	0.536135	3516.76	0.355906	136.859	14.7459	25.6286	11.4496	147.123	41.242	413.778		557.938	885.43	153.176	8762.23	0.568375	32.0733	1.50171	223.261	32.2667	173.166	203.367	739.314	1142.44	1682.02	3487.11
12ZA54-4.1	-0.102802	-0.853847	482.677	374.469	269.604	3.3534	269.466	3.82368	209.972	52.4137	-28.7873	23.4382	1.25669	0.0508405	1.56479	23.4526	1.26077	0.0503456	2.26113	0.295986	2.58887	0.0426391	1.26077	0.486995	1299.28	0.0821196	45.526	2.38874	4.18827	1.46476	29.143	9.77589	115.728		218.54	466.132	93.528	10114.7	0.40414	55.1853	0.346496	74.2675	5.227	28.2991	26.0171	146.447	270.8	470.44	1365.87
12ZA54-1.1	-0.126216	-1.0215	496.687	381.114	271.443	4.91282	269.886	5.57355	252.53	58.0643	-7.59149	23.2816	1.83185	0.0506941	1.54494	23.2645	1.83635	0.0512821	2.52433	0.30393	3.1216	0.0429839	1.83635	0.588272	972.751	0.0374331	53.774	1.02623	2.74321	0.686377	22.4388	7.74526	90.6922		170.217	325.109	60.0189	11805.1	0.266675	147.297	0.157946	87.7227	2.24558	18.5352	12.1914	112.758	214.55	368.667	1063.86
12ZA54-13.1	0.0274671	0.152212	470.73	539.426	276.695	1.74709	276.086	2.19743	323.381	41.5031	14.6345	22.7953	0.632706	0.0520452	1.49824	22.771	0.636728	0.0528967	1.82742	0.320293	1.93517	0.0439154	0.636728	0.32903	2466.52	0.148245	45.0949	5.70366	9.46907	3.45377	67.0246	22.5301	247.513		410.907	759.68	137.157	9461.01	0.4179	26.3289	0.625507	73.5643	12.4807	63.9802	61.3459	336.807	624.104	1006.15	2568.17
12ZA54-3.1	0.626135	10.0292	681.613	371.504	430.986	12.4487	443.283	13.4542	479.022	90.6078	10.2319	14.3724	2.93556	0.0605559	3.5592	14.4413	2.93742	0.0567026	4.0998	0.541376	5.04349	0.0692461	2.93742	0.582419	2583.47	12.7261	57.6313	22.4813	15.8504	5.68233	69.1235	24.1135	272.944		459.665	851.108	155.823	11323.7	0.52329	1.82924	53.6967	94.0151	49.1931	107.097	100.929	347.354	667.964	1109.53	2872.9
12ZA54-10.1	-0.00955496	-0.269872	330.163	77.0159	455.515	3.25241	455.612	3.35188	459.111	38.044	0.800188	13.6591	0.723559	0.0560264	1.33113	13.6563	0.727477	0.0561949	1.7155	0.567368	1.86337	0.0732263	0.727477	0.390409	1193.1	0.00459371	7.81448	0.281312	1.34735	0.120583	17.6148	7.6378	106.303		224.128	435.694	80.1888	12968.1	0.0754495	116.707	0.0193828	12.7479	0.615562	9.10371	2.1418	88.5168	211.573	432.127	1400.8
12ZA54-2.1	0.118639	3.02394	487.853	109.582	458.05	10.3453	456.351	10.6401	455.458	30.6559	-0.58131	13.5634	2.30631	0.0571297	1.01552	13.5806	2.30718	0.0561024	1.38148	0.569591	2.68915	0.0736343	2.30718	0.857957	4743.39	1.55403	6.32626	3.13595	7.84925	0.737297	75.0458	34.0585	439.484		823.771	1428.91	240.315	11671.8	0.0926007	1.53853	6.55707	10.3202	6.86203	53.0354	13.0959	377.115	943.448	1786.52	5148.57
Spot Name	7-corr %com 206	7-corr %com 208	ppm U	ppm Th	207corr 206Pb /238U Age	1s err	208corr 206Pb /238U Age	1s err	204corr 207Pb /206Pb Age	1s err	% Dis- cor- dant	Total 238 /206	% err	Total 207 /206	% err	4corr 238 /206*	% err	4corr 207* /206*	% err	4corr 207* /235	% err	4corr 206* /238	% err	err corr	Y (ppm)	La (ppm)	Ce (ppm)	Nd (ppm)	Sm (ppm)	Eu (ppm)	Gd (ppm)	Tb (ppm)	Dy (ppm)		Er (ppm)	Yb (ppm)	Lu (ppm)	Hf (ppm)	Eu (star)	Ce /Ce*	La (ch)	Ce (ch)	Nd (ch)	Sm (ch)	Eu (ch)	Gd (ch)	Tb (ch)	Dy (chn)	Er (ch)
12ZA61-7.1	1.0994	10.1724	732.975	510.217	231.889	9.53346	234.602	10.8526	248.213	130.12	6.65344	27.0025	4.14761	0.0596213	4.15067	27.2903	4.1516	0.051186	5.65249	0.258609	7.0133	0.0366431	4.1516	0.59196	1762.68	13.439	79.0049	17.1779	14.8863	5.8878	58.6041	17.0981	176.787		281.054	544.456	103.342	8035.34	0.607638	2.79163	56.7045	128.882	37.5883	100.583	104.579	294.493	473.632	718.646	1756.59
12ZA61-9.1	1.39918	10.6124	859.856	679.091	233.862	8.28953	234.88	9.61892	285.113	79.6833	18.1858	26.6893	3.58317	0.0620647	1.9558	27.0292	3.58705	0.0520159	3.48459	0.26534	5.00093	0.036997	3.58705	0.717276	1474.57	11.6206	87.8158	14.2707	12.5759	5.13676	53.4255	15.6142	155.731		228.062	415.818	76.9626	7945.12	0.604078	3.66106	49.032	143.256	31.227	84.9726	91.239	268.47	432.527	633.054	1425.39
12ZA61-14.1	0.645394	5.66541	992.66	744.894	246.108	6.65261	248.557	7.78539	306.425	81.3827	19.9251	25.5307	2.72836	0.0563074	2.99907	25.6528	2.73019	0.0525039	3.57252	0.282201	4.49631	0.0389821	2.73019	0.607206	2288.92	11.0927	84.8929	21.9555	18.1595	6.6086	74.6621	22.9926	237.401		368.587	695.712	129.052	8819.51	0.547088	2.92047	46.8048	138.488	48.0427	122.699	117.382	375.186	636.914	965.045	2303.67
12ZA61-25.1	2.52228	17.3017	1066.65	941.29	249.208	1.42928	253.176	1.99851	339.818	90.4118	26.9929	24.7309	0.572897	0.0714094	1.0384	25.3052	0.624584	0.0532815	3.99255	0.290314	4.04111	0.0395176	0.624584	0.154557	2042.67	22.122	140.327	28.1548	21.1873	10.038	87.2657	25.1304	192.131		324.754	581.215	102.281	8713.93	0.711602	3.01874	93.3416	228.919	61.6078	143.158	178.295	438.521	696.132	781.021	2029.71
12ZA61-12.1	0.107587	0.986989	587.889	405.349	252.543	4.43673	252.41	4.96979	248.791	44.349	-1.52717	25.0023	1.77733	0.0521443	1.2211	25.0318	1.77981	0.0511989	1.92676	0.282013	2.623	0.0399491	1.77981	0.678541	1549.81	2.36425	51.7267	4.44104	6.05966	2.27288	38.2754	12.8199	143.014		266.118	523.951	98.6706	9398.64	0.454928	8.57034	9.97572	84.3829	9.71781	40.9436	40.371	192.339	355.121	581.358	1663.24
12ZA61-22.1	1.92974	12.118	771.723	680.797	253.17	3.7917	251.708	4.28789	178.118	304.866	-42.6787	24.4843	1.31916	0.0667554	8.80932	25.0171	1.35434	0.0496605	13.0756	0.273701	13.1455	0.0399727	1.35434	0.103027	1629.24	7.78417	73.4516	10.2393	10.3098	3.68326	52.7457	16.7749	148.394		274.035	485.755	86.9242	8932.16	0.481463	4.41703	32.8446	119.823	22.4055	69.6608	65.4221	265.054	464.68	603.228	1712.72
12ZA61-29.1	0.573227	7.54311	406.852	188.79	256.024	1.77486	256.483	1.93233	344.56	78.308	26.0201	24.5408	0.688296	0.0559529	1.97583	24.6196	0.712711	0.0533932	3.46096	0.299024	3.53358	0.040618	0.712711	0.201696	1012.04	0.459937	26.9885	1.36942	2.48395	0.908196	19.3172	7.87401	93.4853		185.743	387.091	76.4578	8408.06	0.399655	18.2572	1.94066	44.0269	2.99653	16.7834	16.1314	97.0713	218.117	380.022	1160.9
12ZA61-10.1	0.682216	8.2207	402.509	216.634	256.687	5.17393	258.674	5.70136	376.136	82.2856	32.1566	24.4493	2.03219	0.0568412	2.74405	24.5321	2.03786	0.0541457	3.65711	0.30432	4.18657	0.0407629	2.03786	0.486762	1129.05	4.22667	31.1123	4.62805	4.30229	1.46252	25.5345	8.70424	102.807		194.526	385.271	74.9054	8504.2	0.425341	3.77664	17.8341	50.7542	10.127	29.0695	25.9773	128.314	241.115	417.915	1215.79
12ZA61-24.1	0.585264	3.6905	754.035	738.788	259.432	1.93751	259.168	2.53842	297.164	60.0916	12.8614	24.209	0.750188	0.0561265	1.38919	24.3256	0.76341	0.052291	2.63352	0.296391	2.74194	0.041109	0.76341	0.27842	2693.6	3.40568	70.241	7.24137	9.84832	3.63468	71.9831	25.5958	255.064		468.43	803.805	140.437	7698.38	0.41612	7.59364	14.37	114.586	15.8454	66.5427	64.5591	361.724	709.025	1036.85	2927.69
12ZA61-11.1	-0.075225	-0.493761	578.669	537.529	260.992	5.64259	258.549	6.71093	189.233	38.9326	-38.4238	24.2212	2.18907	0.0508684	1.13484	24.2505	2.19036	0.049898	1.6732	0.283703	2.75632	0.0412363	2.19036	0.794669	1718.52	0.100206	41.927	2.08856	4.43599	1.66132	38.3717	13.5844	157.98		299.255	588.69	111	8284.96	0.388151	49.2033	0.422812	68.3964	4.57015	29.9729	29.5083	192.823	376.3	642.197	1870.35
12ZA61-8.1	-0.0936713	-0.744671	371.408	292.441	263.527	3.8029	262.383	4.33751	208.238	55.2627	-26.9051	23.9879	1.45889	0.0507773	1.5362	24.0019	1.46328	0.050308	2.38329	0.288996	2.79665	0.0416634	1.46328	0.523228	2804.08	0.106439	28.3588	4.0396	9.52556	3.35603	76.7934	25.5168	286.416		474.039	811.931	147.355	8147.18	0.37824	23.2188	0.449112	46.2623	8.83938	64.3619	59.6098	385.897	706.837	1164.29	2962.75
12ZA61-15.1	0.0351419	0.308639	846.989	606.069	263.832	4.34249	263.241	4.8831	237.8	35.8298	-11.0924	23.9288	1.66633	0.0518167	1.03666	23.9545	1.6679	0.0509552	1.55354	0.293294	2.27934	0.0417458	1.6679	0.731749	1242.41	0.612823	42.3808	1.68524	2.90656	1.06859	24.4438	8.80806	108.041		221.113	460.881	90.1725	10111.5	0.386444	22.3894	2.58575	69.1367	3.68762	19.6389	18.9803	122.833	243.99	439.19	1381.95
12ZA61-30.1	-0.13509	-1.34635	267.019	165.939	264.116	2.17293	262.77	2.45566	74.1651	119.277	-259.622	23.9432	0.818429	0.0504585	2.51849	24.031	0.855778	0.0475152	5.01807	0.272623	5.09052	0.0416129	0.855778	0.168112	858.423	0.0772712	17.7853	1.11389	2.92324	1.01804	21.4375	7.8497	77.1589		151.461	296.595	55.5803	8386.62	0.392008	32.5463	0.326039	29.0135	2.43739	19.7516	18.0824	107.726	217.443	313.654	946.632
12ZA61-4.1	0.036305	0.412994	475.928	279.357	264.422	5.40556	265.531	5.92639	299.313	57.4641	11.8102	23.874	2.06915	0.0518393	1.47776	23.8591	2.07349	0.0523403	2.51934	0.302471	3.26289	0.0419128	2.07349	0.635477	1189.69	0.299085	25.6594	1.80403	3.73447	1.19361	26.6434	9.26288	108.641		207.416	424.886	82.9653	9915.65	0.364756	18.7542	1.26196	41.8587	3.94756	25.2329	21.2009	133.886	256.59	441.628	1296.35
12ZA61-28.1	0.219409	2.0147	755.58	517.774	264.718	2.19047	264.672	2.48083	299.101	49.9509	11.6468	23.8031	0.833201	0.0533137	1.40404	23.8322	0.840206	0.0523354	2.18987	0.302784	2.34552	0.0419601	0.840206	0.358218	831.034	2.65525	47.4497	5.49441	5.06866	1.91145	20.7531	7.53313	78.3952		146.877	324.386	63.9319	9469.73	0.568099	6.66948	11.2036	77.4057	12.0228	34.2477	33.9511	104.287	208.674	318.68	917.983
12ZA61-1.1	0.276304	2.60958	484.914	314.567	265.903	4.61334	265.23	5.43527	286.799	46.4217	7.38262	23.6813	1.75587	0.0537966	1.30422	23.7329	1.75863	0.0520543	2.03066	0.302417	2.68633	0.0421356	1.75863	0.65466	1189.95	0.432852	26.1144	3.45355	5.96062	2.09442	38.7589	12.1273	123.256		199.123	380.255	71.2333	10160.1	0.42003	11.467	1.82638	42.6009	7.55701	40.2745	37.201	194.768	335.936	501.039	1244.52
12ZA61-26.1	-0.212022	-5.72813	577.771	140.805	266.172	1.74591	265.879	1.79558	164.493	49.056	-62.6526	23.7727	0.657139	0.0498878	1.60686	23.788	0.662185	0.0493715	2.09873	0.286167	2.20071	0.042038	0.662185	0.300895	782.724	0.00953164	12.7184	0.375504	1.34718	0.189444	13.571	5.799	67.6585		150.15	338.841	65.0937	10835.7	0.135055	114.134	0.0402179	20.7479	0.821673	9.10253	3.3649	68.196	160.637	275.035	938.436
12ZA61-6.1	0.0698921	0.719684	452.526	276.949	266.718	4.35368	266.391	4.95774	193.719	57.2706	-38.1923	23.6563	1.65151	0.0521602	1.422	23.7203	1.65603	0.0499944	2.46334	0.290605	2.96824	0.042158	1.65603	0.557916	1194.14	0.784601	23.5274	1.88467	3.74605	1.14575	28.1275	9.6881	112.993		210.553	418.008	80.0037	9778.01	0.34024	10.3873	3.31055	38.3807	4.12401	25.3112	20.3507	141.344	268.369	459.322	1315.96
12ZA61-23.1	-0.0461137	-0.285532	774.748	745.629	268.14	3.12439	264.453	3.75723	167.793	55.5895	-60.6212	23.5555	1.17729	0.0512621	1.43177	23.609	1.18281	0.0494413	2.37969	0.288744	2.65744	0.0423568	1.18281	0.445095	1494.24	0.432772	47.3799	1.65307	3.47473	1.56629	33.1091	12.1961	138.165		272.94	544.466	101.405	8267.01	0.44513	30.074	1.82604	77.2918	3.61722	23.4779	27.8204	166.377	337.841	561.647	1705.87
12ZA61-5.1	-0.0425501	-0.396339	309.331	213.098	268.765	3.33535	268.639	3.73561	202.096	69.1527	-33.4375	23.4988	1.25244	0.0513047	1.79215	23.5319	1.26099	0.050175	2.97897	0.293989	3.23486	0.0424955	1.26099	0.389812	2829.1	0.0887575	15.7402	5.59904	11.9326	3.4868	92.8512	28.1485	297.512		460.412	763.802	135.392	8941.28	0.319312	11.9873	0.374504	25.6773	12.2517	80.6257	61.9325	466.589	779.737	1209.4	2877.57
12ZA61-27.1	0.227325	1.5207	508.029	458.659	271.245	3.39096	269.102	4.05385	323.279	52.2352	16.3118	23.2167	1.26193	0.0535248	1.70927	23.2349	1.26589	0.0528943	2.29992	0.313884	2.62528	0.0430386	1.26589	0.482192	1700.06	0.115607	39.291	3.93628	7.87161	3.29098	50.4277	15.3825	127.942		287.939	549.142	99.8772	7988.57	0.503509	31.2702	0.487792	64.0963	8.6133	53.1866	58.4543	253.405	426.108	520.087	1799.62
12ZA61-13.1	-0.0451728	-1.05989	721.449	193.81	273.669	4.37051	273.327	4.52526	275.892	31.4409	0.816648	23.0695	1.61749	0.0513942	1.03104	23.0576	1.61857	0.0518067	1.37265	0.309794	2.12225	0.0433697	1.61857	0.762667	1258.11	0.0194646	18.1663	0.720027	2.0492	0.491999	20.2104	8.03595	102.176		230.738	518.565	102.159	10382.3	0.233042	82.3837	0.0821289	29.6351	1.57555	13.8459	8.73889	101.56	222.602	415.35	1442.12
12ZA61-21.1	-0.162679	-0.923338	109.312	122.375	515.622	5.49902	511.398	7.03393	394.485	111.696	-31.4609	12.0284	1.07469	0.0563293	2.79707	12.0541	1.10836	0.0545898	4.98027	0.624421	5.10211	0.0829593	1.10836	0.217235	2406.74	0.0510429	10.8105	2.90681	8.69362	0.874684	72.4074	26.093	277.527		405.603	626.792	109.64	9595.76	0.106269	15.0676	0.215371	17.6355	6.36063	58.7407	15.5361	363.856	722.798	1128.16	2535.02
12ZA61-2.1	-0.0476232	-0.338002	165.817	151.628	520.029	10.1164	518.779	12.9376	564.383	61.7224	8.04581	11.9086	1.98872	0.0573809	1.65232	11.8857	1.99593	0.0589522	2.83377	0.683877	3.46612	0.084135	1.99593	0.57584	3460.71	0.0274956	9.28227	2.82829	9.23898	0.944345	92.0696	32.5687	354.016		556.766	871.526	148.852	11102.7	0.0986983	17.8703	0.116015	15.1424	6.18882	62.4256	16.7735	462.661	902.18	1439.09	3479.79
12ZA61-3.1	0.0405683	0.459683	216.058	130.193	1108.14	17.7717	1106.45	18.5423	1101.76	19.6305	-0.60103	5.3295	1.66302	0.0768728	0.800905	5.3332	1.66379	0.0762876	0.981539	1.97227	1.93174	0.187505	1.66379	0.861291	2119.31	0.0896852	23.0105	5.70286	9.94997	0.270899	68.6689	21.8133	234.475		355.772	534.679	91.9305	9069.47	0.0315912	17.2739	0.378419	37.5375	12.4789	67.2295	4.81171	345.07	604.246	953.148	2223.57
Spot Name	7-corr %com 206	7-corr %com 208	ppm U	ppm Th	207corr 206Pb /238U Age	1s err	208corr 206Pb /238U Age	1s err	204corr 207Pb /206Pb Age	1s err	% Dis- cor- dant	Total 238 /206	% err	Total 207 /206	% err	4corr 238 /206*	% err	4corr 207* /206*	% err	4corr 207* /235	% err	4corr 206* /238	% err	err corr	Y (ppm)	La (ppm)	Ce (ppm)	Nd (ppm)	Sm (ppm)	Eu (ppm)	Gd (ppm)	Tb (ppm)	Dy (ppm)		Er (ppm)	Yb (ppm)	Lu (ppm)	Hf (ppm)	Eu (star)		La (ch)	Ce (ch)	Nd (ch)	Sm (ch)	Eu (ch)	Gd (ch)	Tb (ch)	Dy (chn)	Er (ch)
12ZA07-11.1	7.42732	37.8549	686.135	946.668	181.398	7.31248	200.701	10.175	605.725	376.802	70.651	32.4371	3.88697	0.108986	8.1457	34.5848	3.92817	0.0600858	17.4203	0.239545	17.8577	0.0289144	3.92817	0.219971	1832.4	28.933	125.926	39.3065	21.8298	7.15452	78.5228	18.7428	185.26		268.436	480.754	88.5738	6642.34	0.526753	1.97439	122.08	205.425	86.0099	147.499	127.079	394.587	519.19	753.089	1677.73
12ZA07-25.1	0.0675437	0.621725	422.223	288.901	237.375	7.62832	237.076	8.5282	196.524	67.6567	-21.0375	26.6422	3.248	0.0514864	2.53715	26.6899	3.24898	0.0500547	2.91156	0.258583	4.36269	0.0374674	3.24898	0.74472	550.221	3.41607	18.826	2.10011	1.88805	0.29746	13.1425	4.29074	48.6492		94.5888	171.196	31.4901	5339.03	0.182026	3.23119	14.4138	30.7113	4.59544	12.7571	5.28349	66.0428	118.857	197.761	591.18
12ZA07-9.1	0.128422	1.41782	367.828	207.432	245.605	8.18078	245.241	8.95361	224.718	73.3594	-9.41006	25.7172	3.37019	0.0521564	1.71732	25.7651	3.3743	0.0506673	3.17324	0.271142	4.63199	0.0388122	3.3743	0.728477	1237.5	1.39098	19.1702	2.28868	4.1785	0.427773	32.086	10.8229	126.963		216.284	366.062	66.2803	8311.16	0.112615	5.75015	5.86912	31.2727	5.00806	28.2331	7.5981	161.236	299.802	516.11	1351.78
12ZA07-6.1	0.136219	1.79578	500.669	232.551	250.853	5.0509	250.29	5.42999	265.352	60.8009	5.53302	25.1669	2.03657	0.0523358	1.48241	25.1911	2.04141	0.0515691	2.64942	0.282257	3.34466	0.0396966	2.04141	0.610347	721.162	0.578312	23.4466	1.26072	1.84556	0.278611	14.0767	5.15972	63.2301		126.255	249.444	46.7822	9423.42	0.166622	14.7145	2.44013	38.249	2.75869	12.47	4.94868	70.7372	142.928	257.033	789.095
12ZA07-7.1	0.0399572	0.557832	239.025	113.166	252.222	4.87947	252.916	5.24415	286.251	97.873	12.0375	25.0517	1.95385	0.0515953	2.22713	25.0378	1.96835	0.0520418	4.28091	0.286588	4.71176	0.0399396	1.96835	0.417754	977.57	0.211186	9.81589	1.66699	3.21182	0.739694	25.4043	8.48016	97.1857		170.919	302.233	56.5287	7152.53	0.249615	7.05606	0.891082	16.0129	3.64767	21.7015	13.1384	127.66	234.907	395.064	1068.24
12ZA07-20.1	-0.0797524	-0.712423	434.992	303.825	253.01	5.04213	251.982	5.7067	175.773	43.9237	-44.5077	25.0021	2.01588	0.0506539	1.52701	25.0347	2.01693	0.0496106	1.88305	0.273233	2.75933	0.0399446	2.01693	0.73095	884.669	0.645357	20.8838	1.26141	2.91359	0.314453	22.4069	7.85089	86.5302		157.117	268.276	47.8433	6994.68	0.118631	12.4263	2.72302	34.0683	2.7602	19.6864	5.5853	112.598	217.476	351.749	981.979
12ZA07-8.1	0.268463	4.38668	263.004	99.1448	253.863	4.28961	253.897	4.58057	247.046	110.752	-2.79456	24.8298	1.70666	0.0534626	1.87682	24.9013	1.72952	0.0511601	4.81011	0.283276	5.1116	0.0401585	1.72952	0.338353	762.147	1.47974	16.9218	2.70697	2.70793	0.399495	19.237	6.51308	75.797		137.008	246.097	44.8658	9305.49	0.168723	4.53768	6.24364	27.6049	5.92335	18.2968	7.09582	96.6683	180.418	308.118	856.302
12ZA07-3.1	0.132816	1.7976	390.72	187.596	259.216	4.10069	259.82	4.41925	298.857	72.8048	13.4354	24.3399	1.59851	0.0524958	1.72657	24.3449	1.60809	0.0523299	3.19165	0.296376	3.57387	0.0410764	1.60809	0.449957	848.775	0.518914	21.6835	1.59883	2.50018	0.34995	18.5934	6.88934	81.3475		151.541	281.831	51.7162	10809.4	0.156455	12.4376	2.18951	35.3727	3.49854	16.8931	6.21582	93.4342	190.84	330.681	947.133
12ZA07-24.1	0.151051	1.90688	325.412	161.497	261.754	2.12598	261.625	2.30957	327.548	1262.96	20.3471	24.0947	0.814201	0.052699	1.808	24.0858	3.77345	0.0529939	55.6503	0.303365	55.778	0.0415182	3.77345	0.0676511	664.689	1.96316	19.1867	1.82164	2.23457	0.24402	14.346	5.80679	63.4665		117.249	209.475	38.593	7928.13	0.131375	5.10203	8.28339	31.2996	3.98609	15.0985	4.33428	72.0902	160.853	257.994	732.809
12ZA07-5.1	-0.00307329	-0.0316969	296.017	173.394	262.637	4.10413	261.027	4.50915	273.745	70.8745	4.11081	24.0491	1.57931	0.0514835	1.73257	24.0408	1.588	0.0517582	3.09306	0.296846	3.47689	0.0415959	1.588	0.456731	1562.89	0.0683933	11.9727	2.73116	5.56131	1.09009	43.8187	14.474	166.484		275.448	460.135	82.2134	9052.59	0.21286	6.23518	0.288579	19.5313	5.97628	37.5764	19.3622	220.195	400.942	676.762	1721.55
12ZA07-21.1	0.038194	0.580427	274.781	113.177	263.372	3.44075	263.026	3.66196	316.951	60.0746	17.1253	23.9707	1.31713	0.0518308	2.02972	23.9433	1.32208	0.0527473	2.6421	0.303751	2.95442	0.0417654	1.32208	0.447493	648.101	3.1401	16.1559	2.31705	2.45132	0.318665	15.816	5.3878	62.5662		116.308	211.631	38.8145	7927.77	0.156004	2.87731	13.2494	26.3554	5.07014	16.563	5.66012	79.4772	149.246	254.334	726.926
12ZA07-10.1	-0.00478859	-0.0331634	800.402	735.006	266.399	4.15054	265.986	4.85379	283.829	32.3617	6.22287	23.703	1.57734	0.0515542	1.05155	23.6902	1.57856	0.0519867	1.41487	0.30257	2.11984	0.0422116	1.57856	0.744662	3855.33	0.818193	48.8252	8.68551	16.5359	2.39908	116.427	38.232	410.783		645.623	1058.62	184.679	7963.71	0.166668	7.09327	3.45229	79.6496	19.0055	111.729	42.6125	585.063	1059.06	1669.85	4035.15
12ZA07-4.1	0.0459093	0.695871	482.439	213.532	267.335	4.25727	268.293	4.54837	291.409	48.9744	8.37123	23.6062	1.61131	0.0519818	1.37604	23.601	1.61488	0.0521594	2.1441	0.304722	2.68421	0.0423711	1.61488	0.601622	1624.4	0.0271855	21.9203	1.56334	3.87356	0.64951	32.8999	12.5622	153.717		296.696	559.087	103.839	9300.6	0.175381	20.2281	0.114707	35.7591	3.42087	26.1727	11.5366	165.326	347.983	624.864	1854.35
12ZA07-22.1	0.376591	2.06936	1110.39	1238.24	273.147	2.03126	271.451	2.55129	282.861	65.6152	3.48102	23.017	0.734328	0.054765	2.48328	23.0977	0.738121	0.0519647	2.86823	0.310199	2.96168	0.0432943	0.738121	0.249224	3098.02	1.40992	61.3411	6.89698	12.6107	1.717	94.2255	30.3382	348.685		499.439	796.107	136.071	7755.37	0.151832	9.51167	5.94905	100.067	15.0919	85.2077	30.4973	473.495	840.394	1417.42	3121.5
12ZA07-23.1	-0.0872489	-0.809716	538.702	355.17	276.156	2.09927	274.382	2.35475	215.844	37.3648	-28.332	22.8668	0.765341	0.0511128	1.41891	22.8851	0.766722	0.0504734	1.61365	0.304097	1.78654	0.0436966	0.766722	0.429166	1530.08	0.0376954	27.5168	2.17164	5.16933	0.532366	41.57	13.8841	142.251		270.642	452.509	80.5319	9120.15	0.110701	18.2809	0.159052	44.8887	4.75195	34.9279	9.45588	208.895	384.602	578.257	1691.52
12ZA07-26.1	1.66991	16.5842	460.249	266.717	294.177	2.28631	295.641	2.57749	432.668	84.2406	32.4636	21.0595	0.779514	0.0656318	1.43165	21.329	0.813894	0.0555303	3.78123	0.358973	3.86784	0.0468846	0.813894	0.210426	1345.96	15.178	52.2672	16.1921	9.64876	1.83773	45.1935	12.7708	129.033		217.653	366.13	64.7753	8549.2	0.268261	1.71432	64.0422	85.2645	35.4313	65.1943	32.6418	227.103	353.763	524.526	1360.33
12ZA07-2.1	0.394458	6.70219	213.954	75.4679	539.331	9.90425	538.482	10.5656	663.341	48.6496	19.1438	11.4144	1.87869	0.061492	1.44624	11.4112	1.88343	0.0617157	2.27082	0.745701	2.95025	0.087633	1.88343	0.638398	2754.44	0.00707168	6.87134	1.46754	5.08674	0.680902	49.7218	21.9907	270.413		481.188	844.67	147.398	11832.2	0.130509	6.91704	0.0298383	11.2094	3.21125	34.3699	12.0942	249.858	609.16	1099.24	3007.42
12ZA07-1.1	-0.266295	-2.62563	113.331	75.2971	745.327	11.2499	741.5	12.1809	580.583	65.0859	-29.3102	8.18047	1.55177	0.0619452	1.6877	8.20574	1.56143	0.0593929	2.99637	0.997972	3.3788	0.121866	1.56143	0.462126	1367.57	0.0997393	4.57187	3.46542	6.51252	0.942202	47.5546	14.7911	152.14		216.98	321.806	56.6401	7883.85	0.163201	1.86366	0.420841	7.45819	7.58297	44.0035	16.7354	238.968	409.725	618.455	1356.13
Spot Name	7-corr %com 206	7-corr %com 208	ppm U	ppm Th	207corr 206Pb /238U Age	1s err	208corr 206Pb /238U Age	1s err	204corr 207Pb /206Pb Age	1s err	% Dis- cor- dant	Total 238 /206	% err	Total 207 /206	% err	4corr 238 /206*	% err	4corr 207* /206*	% err	4corr 207* /235	% err	4corr 206* /238	% err	err corr	Y (ppm)	La (ppm)	Ce (ppm)	Nd (ppm)	Sm (ppm)	Eu (ppm)	Gd (ppm)	Tb (ppm)	Dy (ppm)		Er (ppm)	Yb (ppm)	Lu (ppm)	Hf (ppm)	Eu (star)	Ce /Ce*	La (ch)	Ce (ch)	Nd (ch)	Sm (ch)	Eu (ch)	Gd (ch)	Tb (ch)	Dy (chn)	Er (ch)
12ZA46-4.1	7.9802	36.3491	601.935	775.657	229.496	10.8601	243.435	16.4163	272.273	777.059	15.8921	25.3905	4.28174	0.114614	13.7498	27.5596	4.30894	0.051725	33.9029	0.258779	34.1756	0.036285	4.30894	0.126082	2176.53	25.379	220.996	37.7928	25.496	8.03396	81.4306	24.7477	237.354		336.956	562.124	99.1367	8741.19	0.537463	3.83102	107.084	360.516	82.6975	172.27	142.699	409.199	685.531	964.852	2105.98
12ZA46-10.1	0.121259	0.589694	240.387	311.252	252.636	4.52251	251.807	5.96883	216.939	97.8129	-16.6648	24.9896	1.80865	0.0522558	1.88846	25.0445	1.82395	0.0504973	4.22502	0.278008	4.60191	0.0399289	1.82395	0.396346	1181.92	0.195892	102.114	2.42393	5.28402	2.18501	35.437	10.8189	114.993		191.802	340.366	62.7173	8356.42	0.486734	79.5585	0.826548	166.58	5.30401	35.7028	38.8101	178.075	299.693	467.452	1198.76
12ZA46-1.1	0.481158	4.09128	122.929	88.9123	257.165	5.27159	257.008	5.93677	315.454	202.846	18.7137	24.4523	2.05355	0.055241	4.42836	24.5298	2.11385	0.0527126	8.91887	0.296292	9.16595	0.0407667	2.11385	0.23062	1046.44	0.114123	14.8458	1.7979	4.17734	1.53482	28.5799	9.84789	109.23		181.229	314.801	56.2385	8923.65	0.42818	17.5958	0.48153	24.2183	3.93414	28.2253	27.2615	143.618	272.795	444.024	1132.68
12ZA46-5.1	-0.0874501	-0.711695	299.582	229.623	257.935	4.33462	256.752	4.92705	263.735	70.3801	2.22757	24.5171	1.69813	0.0507021	1.87104	24.4917	1.70545	0.0515328	3.06595	0.290112	3.50836	0.0408301	1.70545	0.48611	784.71	0.0156117	40.9174	0.918971	2.41398	0.668747	17.7047	6.41354	74.4306		138.413	283.688	53.8952	12092	0.311817	183.402	0.0658722	66.7494	2.01088	16.3107	11.8783	88.9681	177.66	302.564	865.079
12ZA46-3.1	-0.103557	-0.819415	473.855	384.89	260.035	3.78336	259.843	4.34528	246.54	57.9093	-5.54504	24.3191	1.47084	0.0506199	1.50841	24.3031	1.4765	0.0511488	2.51486	0.290185	2.91626	0.041147	1.4765	0.506298	1310.48	0.0223655	49.1574	1.62921	3.74618	1.14701	30.0481	10.274	117.692		227.496	445.681	83.7404	9867.56	0.329544	138.256	0.0943693	80.1916	3.56502	25.312	20.3732	150.996	284.599	478.424	1421.85
12ZA46-7.1	0.144413	1.25555	210.889	148.792	275.893	4.16447	274.709	4.76189	183.91	97.2456	-50.716	22.8362	1.52466	0.0529651	1.97555	22.9269	1.54088	0.0497841	4.17525	0.299396	4.45051	0.0436169	1.54088	0.346227	626.082	1.50459	44.5119	4.72453	3.44663	0.839128	14.9977	4.93967	57.1091		106.669	209.889	40.1908	10407.7	0.355769	8.96312	6.34849	72.6132	10.3381	23.288	14.9046	75.3652	136.833	232.151	666.684
12ZA46-6.1	-0.165033	-1.4181	148.27	109.721	285.45	7.19486	284.589	8.16875	249.74	146.547	-14.5034	22.1235	2.55182	0.050699	2.41264	22.1091	2.57943	0.05122	6.36786	0.319425	6.87045	0.0452302	2.57943	0.375438	1580.98	0.0598054	8.36889	3.58612	7.82393	2.43064	52.3013	16.094	169.771		266.846	453.46	82.1529	7569.38	0.366269	9.70191	0.252343	13.6524	7.8471	52.8644	43.173	262.821	445.818	690.125	1667.79
12ZA46-2.1	0.145393	1.50785	945.387	514.218	325.221	11.0226	321.479	12.0105	364.992	22.027	11.0695	19.2977	3.44307	0.0541092	0.827466	19.3033	3.44324	0.0538785	0.97705	0.384845	3.57918	0.0518047	3.44324	0.962019	1319.29	0.173327	25.8269	1.65567	4.35653	0.420955	36.6811	12.0003	134.78		231.256	412.204	75.4063	8358.84	0.101506	25.8835	0.731338	42.1319	3.62291	29.436	7.477	184.327	332.419	547.885	1445.35
12ZA46-9.1	0.105183	1.1054	663.629	411.929	463.731	8.56704	464.104	9.36324	495.377	22.4388	6.52688	13.3931	1.88692	0.057165	0.820589	13.3938	1.8874	0.0571243	1.01816	0.588058	2.14451	0.0746617	1.8874	0.880106	4976.51	0.156084	13.4319	8.3076	18.738	2.55406	149.382	48.8763	536.454		799.003	1221.32	204.884	7742.2	0.147153	6.33275	0.658584	21.9118	18.1786	126.608	45.3651	750.661	1353.91	2180.71	4993.77
12ZA46-8.1	-0.103694	-5.30327	412.478	50.6925	477.704	3.0436	476.863	3.04156	442.2	31.0001	-8.21027	13.0142	0.647799	0.0558272	0.997401	13.0152	0.651229	0.0557686	1.39378	0.5908	1.53841	0.0768333	0.651229	0.423312	3261.38	0.009099	0.863639	1.02086	4.76059	0.242658	59.4627	26.665	316.619		541.078	935.756	160.549	10756.5	0.0439633	4.81088	0.0383924	1.40887	2.23382	32.1661	4.31009	298.808	738.644	1287.07	3381.74
12ZA46-11.1	-0.0699012	-0.77999	145.778	84.078	523.473	8.96922	522.086	9.69903	512.302	52.5535	-2.2335	11.8297	1.75096	0.0572903	1.65654	11.8257	1.75525	0.0575653	2.39155	0.671173	2.96654	0.0845614	1.75525	0.59168	697.151	0.116145	15.9876	3.00918	5.18869	0.782015	32.1811	9.0537	86.8895		105.561	151.09	25.7799	8952.49	0.184474	14.5188	0.490063	26.0809	6.58463	35.0587	13.8901	161.714	250.795	353.209	659.758
Spot Name	7-corr %com 206	7-corr %com 208	ppm U	ppm Th	207corr 206Pb /238U Age	1s err	208corr 206Pb /238U Age	1s err	204corr 207Pb /206Pb Age	1s err	% Dis- cor- dant	Total 238 /206	% err	Total 207 /206	% err	4corr 238 /206*	% err	4corr 207* /206*	% err	4corr 207* /235	% err	4corr 206* /238	% err	err corr	Y (ppm)	La (ppm)	Ce (ppm)	Nd (ppm)	Sm (ppm)	Eu (ppm)	Gd (ppm)	Tb (ppm)	Dy (ppm)		Er (ppm)	Yb (ppm)	Lu (ppm)	Hf (ppm)	Eu (star)	Ce /Ce*	La (ch)	Ce (ch)	Nd (ch)	Sm (ch)	Eu (ch)	Gd (ch)	Tb (ch)	Dy (chn)	Er (ch)
12ZA22B-4.1	5.51887	52.5689	988.06	404.408	243.771	4.57071	246.629	5.15475	353.444	128.637	31.403	24.5157	1.88914	0.0952749	1.45591	25.8662	1.91872	0.0536035	5.6943	0.285734	6.00887	0.0386605	1.91872	0.319314	2126.19	26.8345	90.0121	41.6655	32.1583	4.63355	111.575	29.9735	270.146		355.177	621.996	111.937	10206.5	0.235794	1.44523	113.226	146.839	91.1717	217.286	82.301	560.676	830.291	1098.15	2219.85
12ZA22B-7.1	1.35535	19.4371	231.445	78.9515	247.863	8.43931	246.911	8.96712	290.683	163.826	14.9131	25.1654	3.43394	0.0620325	3.85918	25.4805	3.45234	0.0521428	7.17138	0.282155	7.9591	0.0392457	3.45234	0.43376	781.131	0.197158	6.71394	0.674181	2.06865	0.17098	18.7314	6.51121	79.6592		141.527	241.222	44.1055	8821.38	0.0837271	9.88675	0.831892	10.9526	1.47523	13.9774	3.03695	94.1277	180.366	323.818	884.544
12ZA22B-6.2	0.139544	2.13601	474.366	195.808	257.856	4.16378	257.948	4.43242	284.084	58.3735	9.35114	24.4692	1.63223	0.0525192	1.6114	24.4853	1.63721	0.0519925	2.55224	0.292777	3.03222	0.0408409	1.63721	0.539938	913.619	0.157151	12.7903	0.936027	2.63811	0.279304	22.4032	7.67301	91.6235		160.977	275.047	49.1325	9626.63	0.110745	17.904	0.663086	20.8651	2.0482	17.825	4.96099	112.579	212.549	372.453	1006.11
12ZA22B-5.1	1.39569	16.9657	1113.02	507.916	258.544	4.82165	259.055	5.26328	388.597	51.0206	33.8906	24.0958	1.88784	0.0626007	0.873175	24.3445	1.89293	0.0544467	2.27254	0.308371	2.95764	0.0410771	1.89293	0.640014	2897.09	17.2598	34.6031	21.9793	18.5011	2.14087	87.602	28.6906	313.49		511.436	826.769	143.702	10864.4	0.1621	0.953809	72.8263	56.4488	48.0948	125.008	38.0261	440.211	794.755	1274.35	3196.47
12ZA22B-1.1	0.919404	9.74894	115.069	61.2962	260.641	2.76182	259.844	3.05205	-188.773	431.878	241.419	24.0135	1.049	0.0588319	3.07591	24.5027	1.3695	0.0426554	17.2748	0.240028	17.329	0.0408119	1.3695	0.0790296	949.101	0.366424	3.77938	2.35924	3.80981	1.15411	32.25	10.2168	107.782		160.125	255.774	46.017	7952.13	0.317379	2.1823	1.54609	6.16538	5.16244	25.742	20.4992	162.06	283.015	438.138	1000.78
12ZA22B-2.1	0.0858039	1.25085	480.497	202.1	264.207	3.68324	263.584	3.932	273.55	49.5239	3.46045	23.882	1.40901	0.0522312	1.52447	23.8962	1.41242	0.0517538	2.16121	0.298617	2.58181	0.0418476	1.41242	0.547064	1395.53	0.0752096	14.9417	1.13582	3.32777	0.283064	32.0326	12.1323	138.694		249.195	426.35	75.6337	10851.4	0.0835719	27.4461	0.31734	24.3747	2.48539	22.485	5.02777	160.968	336.075	563.797	1557.47
12ZA22B-6.1	-0.188366	-1.99198	414.379	243.311	264.762	4.74048	263.403	5.52333	126.632	81.956	-110.563	23.8963	1.81096	0.0500459	1.73993	23.9399	1.81989	0.048581	3.48183	0.279799	3.92876	0.0417713	1.81989	0.463224	1695.64	0.110579	12.2725	3.2827	6.81117	1.81384	53.9954	16.8698	184.684		291.99	494.172	90.2756	8922.49	0.288309	10.9359	0.466576	20.0204	7.18316	46.0214	32.2174	271.334	467.307	750.75	1824.94
12ZA22B-3.1	0.148124	1.98088	592.858	264.118	265.895	3.08915	264.779	3.2832	218.771	78.1713	-21.8295	23.7125	1.16462	0.0527688	2.60926	23.7786	1.17132	0.0505372	3.37773	0.29304	3.57505	0.0420546	1.17132	0.327636	1426.52	0.236537	27.7436	1.4561	3.41173	0.453022	27.413	10.243	129.998		258.505	490.277	92.3066	10227.2	0.142792	25.3799	0.998046	45.2587	3.1862	23.0522	8.04657	137.754	283.741	528.446	1615.66
Spot Name	7-corr %com 206	7-corr %com 208	ppm U	ppm Th	207corr 206Pb /238U Age	1s err	208corr 206Pb /238U Age	1s err	204corr 207Pb /206Pb Age	1s err	% Dis- cor- dant	Total 238 /206	% err	Total 207 /206	% err	4corr 238 /206*	% err	4corr 207* /206*	% err	4corr 207* /235	% err	4corr 206* /238	% err	err corr	Y (ppm)	La (ppm)	Ce (ppm)	Nd (ppm)	Sm (ppm)	Eu (ppm)	Gd (ppm)	Tb (ppm)	Dy (ppm)		Er (ppm)	Yb (ppm)	Lu (ppm)	Hf (ppm)	Eu (star)	Ce /Ce*	La (ch)	Ce (ch)	Nd (ch)	Sm (ch)	Eu (ch)	Gd (ch)	Tb (ch)	Dy (chn)	Er (ch)
12ZA22A-10.1	1.87912	15.9686	494.672	385.089	252.703	3.42974	258.518	3.99322	395.258	119.806	36.5118	24.5431	1.34731	0.0663391	3.22028	24.9093	1.36935	0.0546086	5.3426	0.302274	5.5153	0.0401456	1.36935	0.248282	536.685	24.5246	73.8928	16.3614	8.55009	3.47995	25.1928	6.14797	55.6548		81.7986	170.63	34.6229	10567.2	0.722767	1.98045	103.479	120.543	35.8017	57.7709	61.8107	126.597	170.304	226.239	511.241
12ZA22A-6.1	0.201141	3.23157	560.121	215.16	259.292	5.32148	259.166	5.63812	306.072	36.5599	15.4811	24.316	2.07744	0.0530451	1.21232	24.3327	2.07855	0.0524957	1.6048	0.297465	2.62598	0.041097	2.07855	0.791535	1121.03	0.534971	23.4421	0.97216	2.35874	0.24384	22.5245	8.72658	108.778		204.024	383.081	70.0228	10227.4	0.101973	17.4516	2.25726	38.2416	2.12726	15.9374	4.33108	113.188	241.734	442.186	1275.15
12ZA22A-5.1	33.3869	80.466	290.078	210.027	264.932	5.33871	262.347	9.33183	#NUM!	#NUM!	#NUM!	15.8777	0.771489	0.319201	3.16263	24.589	2.42269	0.0262279	93.7889	0.14707	93.8202	0.0406686	2.42269	0.0258226	412.039	38.4516	44.4624	6.72042	3.45522	0.928575	11.8494	3.49841	37.5534		67.9462	137.627	27.0499	10569.1	0.442365	1.48494	162.243	72.5325	14.7055	23.3461	16.4933	59.5445	96.9089	152.656	424.664
12ZA22A-1.1	0.756734	16.3025	671.791	307.744	431.538	8.60592	445.481	9.18373	558.427	30.2259	23.1769	14.3345	2.0343	0.0616268	0.811153	14.3851	2.03586	0.0587913	1.38632	0.563509	2.46305	0.0695163	2.03586	0.826562	782.708	5.59102	42.5871	3.98118	3.14415	1.40839	20.6215	6.40812	73.1431		134.241	282.474	54.2487	11824.1	0.533165	4.84617	23.5908	69.4732	8.71155	21.2443	25.0159	103.625	177.51	297.33	839.005
12ZA22A-7.1	0.0690273	1.10063	1330.03	568.237	482.331	4.89482	483.906	5.18535	469.362	17.0899	-2.82571	12.8625	1.03689	0.0573479	0.602723	12.8766	1.0374	0.0564555	0.771994	0.604513	1.29313	0.0776601	1.0374	0.802242	4368.49	8.43834	20.7235	5.91416	8.38835	0.646465	73.9085	30.8814	394.602		723.296	1207.57	199.064	12779.3	0.0791423	1.57492	35.6048	33.8067	12.9413	56.678	11.4825	371.399	855.441	1604.07	4520.6
12ZA22A-9.1	0.0576831	7.59918	381.772	21.9548	495.125	7.61175	495.968	7.55726	516.208	27.8818	4.17809	12.5189	1.57122	0.0575864	1.00988	12.5177	1.57217	0.0576678	1.26966	0.6352	2.02083	0.079887	1.57217	0.777983	292.309	0.0478678	1.97266	0.817785	2.80676	0.0978959	18.3768	4.51902	38.7104		45.0981	96.8509	18.7269	10092.6	0.0415505	5.35283	0.201974	3.21805	1.78946	18.9646	1.73883	92.3457	125.181	157.359	281.863
12ZA22A-2.1	1.06868	48.2535	638.506	104.727	535.534	5.11277	542.554	5.20041	574.998	39.0381	7.0307	11.4209	0.976046	0.0668799	0.785023	11.5292	0.982613	0.0592404	1.79551	0.708467	2.0468	0.0867361	0.982613	0.480073	536.143	14.1538	38.5414	9.94712	8.09368	2.8275	23.6106	7.08331	65.5151		85.4089	164.178	30.4237	11990.9	0.623483	1.74387	59.7208	62.8734	21.7661	54.6871	50.222	118.646	196.214	266.321	533.806
12ZA22A-8.1	-0.159578	-18.9975	384.373	20.79	925.612	13.407	923.808	12.7122	866.72	83.2573	-7.04217	6.48679	1.46478	0.0686083	3.9343	6.49175	1.46553	0.0679694	4.01586	1.44362	4.27492	0.154042	1.46553	0.34282	732.047	3.45324	6.36181	2.23103	2.69463	0.298045	25.5995	9.2651	94.3784		97.7925	116.634	18.3813	12959.2	0.109387	1.23051	14.5706	10.3782	4.8819	18.207	5.29387	128.641	256.651	383.652	611.203
12ZA22A-3.1	0.185972	2.01286	296.131	181.348	976.329	19.6669	974.654	20.8228	1014.86	19.388	3.93295	6.10395	2.0868	0.0732453	0.782315	6.10527	2.08735	0.0730644	0.956843	1.65007	2.29621	0.163793	2.08735	0.909042	1096.68	0.047514	21.0303	0.793725	2.50611	0.595879	24.6823	8.50581	104.34		193.679	347.692	63.1183	10128.8	0.230948	58.1395	0.200481	34.3072	1.73682	16.9332	10.584	124.032	235.618	424.147	1210.49
12ZA22A-4.1	0.197459	2.03444	156.583	102.445	1017.72	7.80702	1017.1	8.29798	1049.24	26.7385	3.11425	5.83579	0.790473	0.0748205	1.00325	5.8393	0.794155	0.074318	1.32648	1.75483	1.54604	0.171253	0.794155	0.513671	3001.24	0.840199	175.408	3.04034	8.38299	3.44703	75.294	26.6618	309.34		494.328	777.923	131.45	7179.03	0.418229	58.9208	3.54514	286.147	6.65282	56.6419	61.2261	378.362	738.555	1257.48	3089.55
Spot Name	7-corr %com 206	7-corr %com 208	ppm U	ppm Th	207corr 206Pb /238U Age	1s err	208corr 206Pb /238U Age	1s err	204corr 207Pb /206Pb Age	1s err	% Dis- cor- dant	Total 238 /206	% err	Total 207 /206	% err	4corr 238 /206*	% err	4corr 207* /206*	% err	4corr 207* /235	% err	4corr 206* /238	% err	err corr	Y (ppm)	La (ppm)	Ce (ppm)	Nd (ppm)	Sm (ppm)	Eu (ppm)	Gd (ppm)	Tb (ppm)	Dy (ppm)		Er (ppm)	Yb (ppm)	Lu (ppm)	Hf (ppm)	Eu (star)	Ce /Ce*	La (ch)	Ce (ch)	Nd (ch)	Sm (ch)	Eu (ch)	Gd (ch)	Tb (ch)	Dy (chn)	Er (ch)
12ZA10-14.1	0.756412	7.71057	421.444	245.184	255.107	7.19084	254.973	7.99861	230.589	75.3563	-10.7698	24.5853	2.85313	0.0573999	1.37483	24.7895	2.85888	0.0507962	3.26309	0.28253	4.33832	0.0403396	2.85888	0.658985	1591.05	0.660253	11.5347	3.42259	6.41667	1.41315	47.1175	14.7384	165.967		263.176	438.93	78.2376	6858	0.247737	4.11952	2.78588	18.8168	7.48926	43.3559	25.1003	236.771	408.266	674.662	1644.85
12ZA10-13.1	0.15811	2.9335	467.307	155.799	262.375	2.82331	262.257	2.96263	311.186	46.6235	15.8899	24.0348	1.086	0.0527696	1.45111	24.0395	1.09012	0.0526138	2.04841	0.30177	2.32042	0.0415982	1.09012	0.469794	1109.4	0.0660301	15.2443	0.85227	2.43431	0.508264	22.5208	8.10207	101.719		203.976	403.009	76.3109	8988.29	0.209246	34.5001	0.278608	24.8684	1.86492	16.4481	9.02777	113.17	224.434	413.492	1274.85
12ZA10-12.1	2.76416	19.4987	771.199	578.873	263.994	7.05015	263.88	7.58676	281.188	542.848	6.1954	23.261	2.23966	0.0736959	16.0598	23.9106	2.25259	0.0519267	23.7223	0.299434	23.829	0.0418224	2.25259	0.0945312	3375.13	1.0426	26.4433	10.5017	18.4953	4.43235	121.944	36.7665	385.042		549.794	867.592	147.26	8284.37	0.284493	4.29042	4.39914	43.1375	22.9796	124.968	78.7274	612.784	1018.46	1565.21	3436.21
12ZA10-3.1	0.049136	0.578818	537.509	285.327	264.417	3.05349	263.932	3.31984	252.597	45.7334	-4.74175	23.8714	1.16691	0.051942	1.3288	23.891	1.17066	0.0512836	1.98827	0.295968	2.3073	0.0418568	1.17066	0.50737	1365.72	0.0420471	9.88192	1.33034	4.09389	0.423594	34.3442	12.6294	147.243		239.128	391.691	68.2179	10112.9	0.108894	22.4318	0.177414	16.1206	2.91103	27.6614	7.52387	172.584	349.844	598.549	1494.55
12ZA10-2.1	-0.0392421	-0.490146	338.563	172.727	264.488	5.9621	264.229	6.44464	146.395	76.9718	-81.7589	23.886	2.28161	0.0512351	1.65605	23.9528	2.28791	0.0489913	3.28206	0.28201	4.0008	0.0417488	2.28791	0.571862	1531.66	0.12163	10.8605	2.45979	5.43019	1.14261	43.465	14.2352	163.342		262.985	444.205	77.5598	8740.79	0.22671	10.6599	0.513206	17.717	5.38247	36.6905	20.2951	218.417	394.327	663.991	1643.66
12ZA10-8.1	0.021899	0.162882	1109.86	935.454	268.317	4.37526	267.425	5.10422	263.065	26.4069	-2.02343	23.5237	1.65152	0.0518114	0.88825	23.5323	1.65217	0.0515178	1.15021	0.301852	2.01312	0.0424948	1.65217	0.820701	5448.24	0.432655	37.1098	14.4932	28.5944	6.06013	185.258	55.4888	593.853		872.652	1411.86	242.201	7680.89	0.253806	7.95622	1.82555	60.538	31.7138	193.206	107.64	930.946	1537.08	2414.04	5454.07
12ZA10-11.1	-0.0430842	-0.418907	888.294	564.628	269.87	3.43349	268.63	3.80196	244.4	27.8262	-10.5625	23.4007	1.28783	0.0513253	1.00722	23.4072	1.28852	0.0511013	1.20796	0.301012	1.76619	0.0427218	1.28852	0.729545	3088.06	0.172752	17.7587	5.08933	12.0108	2.65688	95.8525	30.3828	338.409		519.799	861.509	147.817	9152.12	0.23869	10.1682	0.728911	28.9702	11.1364	81.154	47.1915	481.671	841.628	1375.65	3248.74
12ZA10-6.1	-0.300861	-4.19242	198.914	91.7261	270.878	6.05761	270.098	6.47485	144.605	91.4291	-88.5323	23.3719	2.2628	0.0492809	2.13429	23.3814	2.27142	0.0489539	3.89723	0.288682	4.51085	0.0427691	2.27142	0.503547	1216.53	0.0385039	3.22894	2.01545	5.34658	0.549453	40.6584	12.8545	140.29		206.923	329.293	56.6606	9104.37	0.113597	6.2229	0.162464	5.26744	4.41018	36.1255	9.75939	204.314	356.08	570.285	1293.27
12ZA10-5.1	0.507072	4.40003	634.476	457.271	271.834	2.28418	272.283	2.61003	292.862	53.0394	7.27743	23.1003	0.848011	0.0557815	1.1329	23.2042	0.857745	0.0521926	2.32267	0.310129	2.47599	0.0430956	0.857745	0.346426	2699.63	0.518587	23.2878	6.46159	12.8888	2.77052	84.7914	27.0957	293.538		447.753	746.155	129.407	8412.39	0.255463	6.82999	2.18813	37.9899	14.1391	87.0868	49.21	426.087	750.574	1193.24	2798.46
12ZA10-10.1	0.238061	1.9782	515.026	387.747	272.792	4.68688	272.487	5.81139	244.85	48.7235	-11.5682	23.0797	1.73949	0.0536459	1.25615	23.1528	1.74267	0.0511113	2.11529	0.304379	2.74069	0.0431913	1.74267	0.635851	2513.3	0.263815	13.4111	5.33603	11.8413	2.82594	82.4323	25.839	281.123		417.665	677.508	116.395	7770.72	0.275718	6.06843	1.11314	21.8777	11.6762	80.0085	50.1944	414.233	715.762	1142.78	2610.4
12ZA10-9.1	0.564886	5.42612	525.606	315.729	272.884	2.86628	271.271	3.27171	45.0419	90.1189	-513.022	22.9962	1.0602	0.0562691	1.38425	23.2653	1.07824	0.0469382	3.77069	0.278176	3.92182	0.0429825	1.07824	0.274934	1969.97	2.90821	13.7129	2.64715	5.33381	1.766	47.4688	16.8857	200.217		336.937	562.034	100.912	7803.57	0.338312	2.65337	12.2709	22.3701	5.79245	36.0393	31.3678	238.537	467.748	813.892	2105.86
12ZA10-15.1	20.8408	77.5029	205.713	98.5182	273.847	13.1361	273.31	17.8174	#NUM!	#NUM!	#NUM!	18.2413	4.49743	0.218913	5.36101	23.8232	4.82692	0.0246328	85.7487	0.142566	85.8844	0.0419759	4.82692	0.0562025	891.051	61.3815	41.3839	7.9664	4.90931	0.97921	25.4715	8.0871	92.6976		155.884	278.314	49.9929	7296.08	0.266924	1.00474	258.994	67.5104	17.4319	33.171	17.3927	127.998	224.019	376.819	974.275
12ZA10-4.1	0.171677	1.62786	668.586	420.85	274.845	3.90621	273.08	4.37365	289.33	36.4236	5.0752	22.9189	1.43882	0.0531601	1.12344	22.9489	1.44061	0.0521119	1.59403	0.313095	2.14856	0.0435751	1.44061	0.670502	2411.76	0.361243	17.7692	5.57466	11.6361	2.82449	81.4286	25.3822	272.154		400.793	666.981	113.932	9975.51	0.279703	6.72251	1.52423	28.9873	12.1984	78.6221	50.1686	409.189	703.107	1106.32	2504.96
Spot Name	7-corr %com 206	7-corr %com 208	ppm U	ppm Th	207corr 206Pb /238U Age	1s err	208corr 206Pb /238U Age	1s err	204corr 207Pb /206Pb Age	1s err	% Dis- cor- dant	Total 238 /206	% err	Total 207 /206	% err	4corr 238 /206*	% err	4corr 207* /206*	% err	4corr 207* /235	% err	4corr 206* /238	% err	err corr	Y (ppm)	La (ppm)	Ce (ppm)	Nd (ppm)	Sm (ppm)	Eu (ppm)	Gd (ppm)	Tb (ppm)	Dy (ppm)		Er (ppm)	Yb (ppm)	Lu (ppm)	Hf (ppm)	Eu (star)	Ce /Ce*	La (ch)	Ce (ch)	Nd (ch)	Sm (ch)	Eu (ch)	Gd (ch)	Tb (ch)	Dy (chn)	Er (ch)
12ZA16-2.1	0.0951098	0.801825	270.283	204.185	255.977	10.6479	255.988	12.0647	277.632	65.6868	7.89966	24.6634	4.21128	0.0521211	1.9195	24.6718	4.21352	0.0518461	2.86866	0.289745	5.09735	0.040532	4.21352	0.82661	856.887	0.0883538	40.7237	2.19535	4.30615	1.87083	27.1666	8.18686	92.6216		142.712	253.164	46.8379	9276.17	0.527255	49.6426	0.372801	66.4334	4.80384	29.0956	33.2296	136.516	226.783	376.511	891.948
12ZA16-3.1	0.407116	2.46222	657.58	622.108	259.8	3.83338	255.495	4.60056	276.3	46.7802	6.04935	24.2173	1.49254	0.0547072	1.18115	24.3051	1.49618	0.051816	2.04249	0.293946	2.53186	0.0411437	1.49618	0.590943	1112.18	0.257858	100.671	1.77751	3.74394	2.10232	32.5752	10.5698	114.267		182.351	326.811	58.0453	10462.5	0.580284	79.8322	1.08801	164.226	3.88952	25.2969	37.3414	163.695	292.792	464.502	1139.69
12ZA16-7.1	0.144504	1.06766	374.045	325.636	260.74	3.95895	261.217	4.60423	272.135	53.7021	4.24207	24.1919	1.53479	0.0526237	1.55494	24.2192	1.53884	0.0517219	2.34295	0.294453	2.80311	0.0412896	1.53884	0.548974	1602.13	0.289793	39.4691	6.45342	10.8716	4.93811	67.6924	18.8781	189.291		253.781	414.755	71.7561	8487.24	0.554873	15.4949	1.22275	64.3867	14.1213	73.4565	87.7106	340.163	522.938	769.477	1586.13
12ZA16-6.1	2.44188	15.4289	175.373	143.289	261.951	10.1614	259.06	11.7106	-789.952	1437.74	135.192	23.5238	3.38914	0.0710643	21.8927	24.6384	3.46073	0.0340153	50.7855	0.190354	50.9032	0.040587	3.46073	0.0679865	596.309	5.28586	37.0922	2.20179	3.41495	1.63494	21.5509	6.33844	66.3494		95.6435	162.614	29.0854	7580.71	0.580931	5.83725	22.3032	60.5093	4.81792	23.074	29.0397	108.296	175.58	269.713	597.772
12ZA16-15.1	5.63251	29.1552	247.126	221.623	262.845	4.07718	261.273	4.81668	184.107	421.575	-43.3388	22.6755	1.28377	0.0966596	7.0941	24.0806	1.44395	0.0497883	18.101	0.285076	18.1585	0.0415272	1.44395	0.079519	836.79	4.86844	48.964	3.55691	5.16714	2.54425	31.2289	9.13677	93.8881		137.397	241.923	43.4592	8370.67	0.610527	6.31709	20.5419	79.876	7.78317	34.9131	45.1909	156.929	253.096	381.659	858.733
12ZA16-13.1	0.262548	1.35561	542.871	664.478	264.004	4.93662	263.748	6.25245	176.639	59.6695	-50.1236	23.8585	1.89256	0.0536434	1.31839	23.9783	1.89709	0.049629	2.5585	0.285377	3.1851	0.0417044	1.89709	0.595614	1812.77	1.28965	93.4905	9.30155	15.7224	6.84906	86.2967	23.845	222.775		278.647	449.01	75.6893	7766.37	0.566793	14.4919	5.44157	152.513	20.3535	106.232	121.653	433.652	660.525	905.591	1741.54
12ZA16-10.1	0.25343	1.26409	387.602	473.264	264.737	4.66838	262.124	5.90102	260.16	55.3122	-1.78256	23.7932	1.78393	0.0535869	1.50397	23.8567	1.78777	0.0514526	2.40799	0.297371	2.99909	0.0419169	1.78777	0.596105	1933.29	0.573239	86.2901	7.85933	14.3553	6.48933	82.9942	23.0195	227.639		297.222	484.656	82.9383	8278.92	0.573085	21.8259	2.41873	140.767	17.1977	96.9954	115.263	417.056	637.658	925.361	1857.64
12ZA16-9.1	0.0437698	0.326435	251.044	200.965	266.529	1.8479	263.854	2.17414	292.715	77.6798	9.06458	23.6796	0.69249	0.0519465	1.82929	23.6725	0.717348	0.0521892	3.40161	0.303975	3.47643	0.0422432	0.717348	0.206346	459.748	0.0518722	42.5742	1.11819	2.32011	1.03895	15.0114	4.57771	47.6651		75.1481	141.849	25.826	8372.68	0.536636	94.9058	0.21887	69.4521	2.44681	15.6764	18.4539	75.4342	126.806	193.76	469.675
12ZA16-21.1	0.0762257	0.7795	365.537	227.215	266.77	3.87246	266.696	4.27944	186.145	64.5091	-43.8998	23.6501	1.46795	0.0522121	1.44981	23.7204	1.47495	0.0498319	2.77084	0.289659	3.13895	0.0421578	1.47495	0.469887	831.081	0.482824	50.134	1.15024	2.68139	1.19989	21.085	7.14192	83.0514		138.168	257.176	46.6243	9031.16	0.486436	36.1173	2.03723	81.7847	2.51693	18.1175	21.3125	105.955	197.837	337.608	863.549
12ZA16-12.1	0.0778072	0.317992	708.657	1066.56	267.581	3.53723	264.298	4.73962	275.39	29.9602	2.87372	23.5766	1.33773	0.0522431	1.09284	23.5897	1.3385	0.0517954	1.30789	0.302739	1.8714	0.0423913	1.3385	0.715238	3219.66	0.47963	83.3601	10.1732	21.0348	10.8815	131.627	36.9608	363.907		494.578	847.85	145.859	8202.42	0.630368	20.2604	2.02376	135.987	22.2607	142.127	193.276	661.441	1023.84	1479.3	3091.11
12ZA16-5.1	0.221518	0.954936	528.662	779.773	267.646	3.96707	267.484	5.33507	206.946	51.4683	-29.7286	23.5368	1.49983	0.0533968	1.22555	23.6285	1.50402	0.0502799	2.21912	0.2934	2.68078	0.0423218	1.50402	0.56104	2356.62	0.949621	89.0794	9.76135	17.1719	8.82451	100.584	28.3573	273.327		379.517	650.533	111.717	8648.59	0.64724	15.7079	4.00684	145.317	21.3596	116.026	156.741	505.449	785.521	1111.09	2371.98
12ZA16-11.1	2.02738	15.1467	391.838	300.272	270.847	2.61472	271.876	2.83709	405.621	256.933	33.6648	22.832	0.652745	0.0679506	8.42764	23.2123	0.718576	0.0548618	11.4784	0.325876	11.5009	0.0430806	0.718576	0.0624801	810.402	0.416118	39.3544	2.97842	5.26641	2.26974	27.8315	7.60932	79.8962		147.34	325.756	67.4996	7769.99	0.571478	18.9786	1.75577	64.1997	6.51733	35.5838	40.3151	139.857	210.785	324.781	920.873
12ZA16-16.1	0.0271568	0.309061	763.71	419.389	271.67	1.58951	271.06	1.73871	242.06	34.1665	-12.3998	23.226	0.589255	0.0519292	1.03165	23.2515	0.593	0.0510494	1.48257	0.30272	1.59676	0.043008	0.593	0.371376	1056.58	0.215322	45.8974	1.4506	3.28937	1.14245	28.2329	9.37862	106.746		171.852	306.511	54.3982	11149.2	0.361369	44.0902	0.908532	74.8734	3.17418	22.2255	20.2922	141.874	259.796	433.925	1074.08
12ZA16-17.1	22.6816	59.6186	306.703	347.807	272.18	9.59438	265.043	13.6323	954.972	627.548	72.3282	17.9285	2.56123	0.233622	6.61205	22.6321	2.8444	0.0709461	30.6884	0.43222	30.82	0.0441851	2.8444	0.0922909	1395.6	9.65294	55.75	7.48993	11.5151	4.59932	59.0413	16.2981	164.124		222.981	373.024	64.0365	7749.19	0.537688	3.52004	40.7297	90.9461	16.3893	77.805	81.6931	296.69	451.47	667.172	1393.63
12ZA16-19.1	0.0295142	0.291006	409.529	268.59	273.6	2.96028	273.887	3.3473	263.86	48.846	-3.74185	23.0582	1.09287	0.0519916	1.42381	23.0713	1.09751	0.0515356	2.12791	0.30799	2.39427	0.0433439	1.09751	0.458389	1245.65	0.119356	45.1581	3.1358	5.75724	2.59479	42.007	13.0001	136.062		202.131	348.113	60.828	9318.69	0.508608	39.6288	0.503612	73.6674	6.86171	38.9002	46.0886	211.09	360.114	553.098	1263.32
12ZA16-14.1	56.3737	90.1189	118.699	86.8084	290.675	19.6014	281.71	46.5128	975.608	1519.66	71.0682	9.45867	4.86783	0.504723	3.33527	21.1539	6.86437	0.0716669	74.5506	0.467122	74.866	0.0472727	6.86437	0.0916888	276.715	41.604	57.5209	5.95845	2.72102	0.731995	9.14678	2.58764	28.6266		47.4261	89.0824	17.05	8970.85	0.447257	1.96139	175.544	93.835	13.0382	18.3853	13.0017	45.9637	71.6797	116.368	296.413
Spot Name	7-corr %com 206	7-corr %com 208	ppm U	ppm Th	207corr 206Pb /238U Age	1s err	208corr 206Pb /238U Age	1s err	204corr 207Pb /206Pb Age	1s err	% Dis- cor- dant	Total 238 /206	% err	Total 207 /206	% err	4corr 238 /206*	% err	4corr 207* /206*	% err	4corr 207* /235	% err	4corr 206* /238	% err	err corr	Y (ppm)	La (ppm)	Ce (ppm)	Nd (ppm)	Sm (ppm)	Eu (ppm)	Gd (ppm)	Tb (ppm)	Dy (ppm)		Er (ppm)	Yb (ppm)	Lu (ppm)	Hf (ppm)	Eu (star)	Ce /Ce*	La (ch)	Ce (ch)	Nd (ch)	Sm (ch)	Eu (ch)	Gd (ch)	Tb (ch)	Dy (chn)	Er (ch)
12ZA19-7.1	2.99257	15.9148	791.759	1113.47	221.03	5.18611	236.842	6.89547	353.58	87.4034	37.8975	27.8103	2.37108	0.0745158	0.888293	28.5599	2.3838	0.0536067	3.86913	0.2588	4.54452	0.0350141	2.3838	0.524544	1903.88	6.82408	100.294	25.5748	21.2628	8.4334	85.0914	25.4978	246.409		312.469	530.563	866.256	7860.23	0.604364	4.07585	28.7936	163.612	55.9624	143.668	149.794	427.595	706.311	1001.66	1952.93
12ZA19-14.1	0.36619	5.29501	252.143	107.897	271.126	2.0062	271.384	2.14616	425.322	61.7823	36.7306	23.1947	0.740032	0.0546357	1.78042	23.174	0.754785	0.0553476	2.76962	0.329306	2.87063	0.0431518	0.754785	0.262934	725.574	0.109705	19.3924	0.443086	1.52424	0.293234	13.8762	5.43884	66.9576		134.12	274.273	483.703	10094.2	0.194358	47.2223	0.46289	31.6353	0.969553	10.2989	5.20841	69.7296	150.66	272.185	838.247
12ZA19-16.1	0.126736	1.49332	304.801	171.273	272.156	1.96092	273.263	2.28758	306.749	62.9004	11.4298	23.1606	0.720888	0.0527387	1.776	23.1672	0.734003	0.0525113	2.76135	0.312522	2.85724	0.0431645	0.734003	0.256893	1305.43	0.0305344	19.6503	0.96377	2.692	1.18181	26.0177	9.58213	117.205		228.27	456.169	822.34	8285.68	0.430454	61.4979	0.128837	32.056	2.10891	18.1892	20.9914	130.742	265.433	476.443	1426.69
12ZA19-12.1	-0.032302	-0.497254	633.287	259.884	273.723	4.33551	273.332	4.59063	239.515	58.4615	-14.4787	23.0618	1.59868	0.0514986	2.31371	23.0764	1.59989	0.0509931	2.53561	0.304681	2.99816	0.0433344	1.59989	0.533623	1278.25	0.373344	26.8049	1.0027	3.10238	0.357185	27.6012	10.5004	128.776		230.261	398.855	70.4551	10137.6	0.117661	23.5205	1.57529	43.7274	2.1941	20.962	6.34432	138.7	290.869	523.479	1439.13
12ZA19-17.1	0.053657	0.796211	288.389	120.394	273.98	3.7526	273.438	3.99226	301.212	53.1953	9.16407	23.02	1.38439	0.0521939	1.62208	23.0145	1.38875	0.0523839	2.33298	0.313832	2.71504	0.0434508	1.38875	0.511502	845.751	0.537914	19.5092	0.469033	1.43077	0.26797	14.6452	5.8466	76.2753		155.857	311.964	58.1204	10683.1	0.178444	20.8522	2.26968	31.8257	1.02633	9.66736	4.75967	73.5942	161.956	310.062	974.104
12ZA19-22.1	0.179584	3.19086	445.852	151.73	274.528	4.33219	274.075	4.58731	287.493	41.1884	4.57112	22.9441	1.59734	0.0532163	1.30153	22.9769	1.59929	0.0520701	1.80196	0.312462	2.40931	0.0435219	1.59929	0.663794	917.006	0.0266497	20.7941	0.416418	1.34391	0.227454	13.6515	5.45104	72.7092		172.285	407.863	81.5352	10596.6	0.161871	105.975	0.112446	33.9219	0.911199	9.08045	4.04004	68.6006	150.998	295.566	1076.78
12ZA19-9.1	0.139798	1.92991	255.494	118.182	276.673	4.09478	276.924	4.39408	335.365	67.0578	17.7399	22.7715	1.49585	0.0529458	1.77483	22.7649	1.50413	0.0531769	2.95891	0.322076	3.31927	0.0439272	1.50413	0.453152	772.797	0.0262666	20.5075	0.493564	1.6006	0.345811	14.9189	5.64166	71.3811		141.04	285.72	54.0129	9635.37	0.215714	96.6967	0.110829	33.4544	1.08001	10.8149	6.1423	74.9695	156.279	290.167	881.499
12ZA19-2.1	0.0476688	0.538353	270.528	150.647	277.451	4.5968	277.025	5.02034	237.764	71.9599	-16.9248	22.7271	1.67537	0.0522244	1.85822	22.7631	1.68267	0.0509544	3.12008	0.308639	3.5449	0.0439307	1.68267	0.474675	1157.18	0.0385016	22.6375	0.713185	2.56499	0.501974	24.2606	8.73331	111.75		204.411	393.39	72.3049	10509.9	0.193971	73.343	0.162454	36.929	1.56058	17.331	8.91606	121.913	241.92	454.267	1277.57
12ZA19-18.1	0.189199	3.32685	381.774	136.62	277.882	2.41789	278.059	2.54938	349.3	40.3562	20.7255	22.659	0.8776	0.0533696	1.34646	22.6552	0.881114	0.0535053	1.78511	0.325634	1.99073	0.04414	0.881114	0.442609	1055.21	0.203287	18.1062	0.628089	1.94835	0.607543	18.7518	7.75178	97.1356		191.231	410.583	76.7199	10328.6	0.306387	27.2041	0.857751	29.537	1.37437	13.1645	10.7912	94.2303	214.731	394.86	1195.19
12ZA19-4.1	0.478946	7.64921	422.138	164.694	278.309	1.78065	279.067	1.89341	392.351	49.7949	29.461	22.5578	0.640534	0.0557038	1.47004	22.5908	0.650139	0.0545379	2.21941	0.332865	2.31267	0.0442658	0.650139	0.28112	734.5	0.0112435	16.9789	0.331375	1.25738	0.221385	12.4221	4.96735	65.3739		138.066	283.045	54.3693	11126.6	0.170752	149.338	0.0474409	27.6981	0.72511	8.49582	3.93224	62.4225	137.6	265.748	862.914
12ZA19-15.1	-0.051074	-0.691549	576.165	266.485	279.165	2.67606	278.475	2.90841	216.478	40.6355	-29.3657	22.6069	0.968781	0.0514711	1.22068	22.6346	0.971888	0.0504872	1.7551	0.307546	2.00623	0.0441802	0.971888	0.484436	1718.11	0.0549206	35.1104	1.61069	4.50002	0.674803	42.6911	14.9781	176.154		297.042	485.868	83.8877	8983.44	0.148405	63.3774	0.231733	57.2763	3.52448	30.4055	11.9858	214.528	414.905	716.075	1856.51
12ZA19-3.1	-0.20954	-2.65732	536.242	259.348	280.074	5.82295	278.44	6.27071	176.83	37.9725	-59.2167	22.5676	2.10655	0.0502202	1.29708	22.5841	2.10739	0.0496331	1.62824	0.303019	2.66312	0.0442789	2.10739	0.791321	1095.08	0.679108	30.3579	1.0088	2.10582	0.355327	19.7115	7.83895	97.0173		203.489	428.785	81.9958	9581.32	0.168115	19.6912	2.86543	49.5235	2.20744	14.2285	6.31131	99.0526	217.145	394.379	1271.81
12ZA19-19.1	0.0360269	0.485807	311.641	146.784	280.272	4.73678	280.115	5.10619	284.901	53.3006	1.64744	22.496	1.71065	0.052195	1.56569	22.5012	1.71428	0.0520111	2.33078	0.318707	2.89332	0.0444421	1.71428	0.592498	737.997	0.0429258	22.5847	0.473166	1.44783	0.328693	14.5133	5.41829	66.9608		133.366	275.37	52.0022	9801.38	0.218574	85.0783	0.181122	36.8428	1.03537	9.78262	5.83824	72.9312	150.091	272.199	833.535
12ZA19-13.1	0.113901	1.64971	309.78	133.962	280.917	3.66168	280.713	3.90704	278.417	56.4391	-0.910451	22.4258	1.31754	0.0528345	1.59389	22.453	1.32298	0.0518639	2.46514	0.318488	2.79771	0.0445375	1.32298	0.472878	757.097	0.0137102	22.3358	0.390166	1.35118	0.319856	14.892	5.56972	69.4832		139.425	286.712	53.9082	10248.9	0.217356	163.955	0.0578491	36.4368	0.853755	9.12961	5.68128	74.834	154.286	282.452	871.404
12ZA19-10.1	0.199965	1.57864	383.052	307.775	281.916	3.11477	281.944	3.58264	343.826	48.9505	18.2563	22.3254	1.11597	0.0535478	1.48602	22.3302	1.12084	0.0533759	2.16318	0.329575	2.43631	0.0447825	1.12084	0.460056	3222.66	0.595868	34.1124	12.5298	21.9349	10.6768	137.658	38.0198	381.935		530.957	817.228	143.842	6829.2	0.592273	6.70251	2.51421	55.6483	27.4175	148.209	189.641	691.75	1053.18	1552.58	3318.48
12ZA19-11.1	-0.118137	-1.74301	394.463	169.233	289.208	4.58638	288.551	4.87675	197.06	47.7302	-47.4455	21.8194	1.60599	0.0511608	1.45331	21.8491	1.60841	0.0500663	2.05424	0.315947	2.609	0.0457685	1.60841	0.616485	672.539	0.0381899	19.1407	0.39226	1.15409	0.195959	11.3968	4.35619	56.8982		122.339	266.561	52.1052	10406.1	0.164703	83.9591	0.161139	31.2246	0.858337	7.7979	3.48062	57.2705	120.67	231.293	764.621
12ZA19-8.1	0.0613414	0.709638	201.094	111.617	525.805	6.80688	524.997	7.34192	498.955	51.4851	-5.5126	11.7597	1.32194	0.0584198	1.44038	11.7771	1.32807	0.0572172	2.33758	0.669871	2.6885	0.0849109	1.32807	0.493982	1173.44	0.107927	14.3705	1.14772	2.87696	0.761981	28.3763	10.0752	118.663		209.39	361.784	64.8221	9724.06	0.257068	21.921	0.455387	23.4429	2.51143	19.4389	13.5343	142.595	279.091	482.368	1308.69
12ZA19-5.1	0.078484	3.74716	324.589	40.0017	542.36	8.21307	541.584	8.22619	546.386	31.7328	0.755287	11.3839	1.54984	0.0589995	1.12905	11.3914	1.55119	0.0584678	1.45247	0.707689	2.12505	0.0877858	1.55119	0.729953	1524.82	0.0139158	0.837809	0.426793	1.85916	0.0832688	26.4281	11.5021	146.193		262.423	478.559	83.0492	12553.7	0.0362109	5.83653	0.0587163	1.36674	0.933902	12.5619	1.47902	132.805	318.617	594.281	1640.14
12ZA19-6.1	0.349266	7.73383	501.95	142.277	642.155	9.56523	642.67	9.70413	734.647	65.2216	12.9381	9.51368	1.51323	0.0639709	3.03402	9.51547	1.5137	0.0638169	3.08014	0.924713	3.43199	0.105092	1.5137	0.441056	599.544	0.058145	4.11314	0.777381	2.78867	0.111601	20.1681	6.1898	66.3127		93.7298	138.104	23.1333	12854.8	0.0453613	10.3866	0.245337	6.70986	1.70105	18.8424	1.98226	101.347	171.463	269.564	585.811
Spot Name	7-corr %com 206	7-corr %com 208	ppm U	ppm Th	207corr 206Pb /238U Age	1s err	208corr 206Pb /238U Age	1s err	204corr 207Pb /206Pb Age	1s err	% Dis- cor- dant	Total 238 /206	% err	Total 207 /206	% err	4corr 238 /206*	% err	4corr 207* /206*	% err	4corr 207* /235	% err	4corr 206* /238	% err	err corr	Y (ppm)	La (ppm)	Ce (ppm)	Nd (ppm)	Sm (ppm)	Eu (ppm)	Gd (ppm)	Tb (ppm)	Dy (ppm)		Er (ppm)	Yb (ppm)	Lu (ppm)	Hf (ppm)	Eu/ Eu*	Ce /Ce*	La (ch)	Ce (ch)	Nd (ch)	Sm (ch)	Eu (ch)	Gd (ch)	Tb (ch)	Dy (ch)	Er (ch)
55-6.1	2.39946	15.6906	880.794	786.867	204.852	4.53787	206.693	5.94643	169.913	177.229	-20.7787	30.2281	2.19964	0.0694034	4.65216	31.0003	2.21078	0.0494862	7.5898	0.2201	7.90523	0.0322578	2.21078	0.279661	2848.16	48.0773	124.648	54.6077	30.7261	13.327	134.446	38.6568	353.945		463.094	820.82	143.615	10152	0.632053	1.30605	202.858	203.34	119.492	207.609	236.714	675.61	1070.82	1438.8	2894.34
55-2.1	1.35168	13.5537	208.119	175.501	244.743	4.40989	256.946	5.18185	-183.713	276.346	236.302	25.4934	1.81579	0.0619319	2.21035	26.1127	1.89967	0.0427419	11.0646	0.225685	11.2265	0.0382955	1.89967	0.169212	803.371	5.28626	25.4273	6.98854	5.89671	2.22359	25.1124	7.96886	82.9844		137.169	284.643	52.5111	9439.88	0.556998	2.24598	22.3049	41.4801	15.2922	39.8426	39.4953	126.193	220.744	337.335	857.304
55-17.1	1.16931	11.294	424.909	281.247	258.849	3.8048	261.749	4.27982	243.684	76.9843	-6.30401	24.1221	1.48649	0.0607936	1.11922	24.4178	1.49921	0.0510854	3.34151	0.288464	3.66242	0.0409537	1.49921	0.409348	917.733	6.28144	56.2967	7.96686	6.98296	2.0061	27.8713	9.15214	96.5936		158.58	307.072	56.4683	9398.98	0.438332	4.2725	26.504	91.838	17.433	47.1822	35.6323	140.057	253.522	392.657	991.125
55-3.1	0.285093	3.5158	420.109	212.907	264.357	3.24318	264.502	3.51942	365.985	49.337	28.1288	23.8205	1.23948	0.0538321	1.39945	23.8185	1.24468	0.0539022	2.18882	0.312028	2.51796	0.0419843	1.24468	0.494318	1254.98	0.515878	23.4914	1.28901	2.88478	1.03524	21.5929	8.07559	103.783		228.449	491.379	97.3605	7202.12	0.399832	15.466	2.1767	38.322	2.82058	19.4917	18.3879	108.507	223.701	421.88	1427.8
55-12.1	0.219379	2.07105	129.256	87.6786	265.048	4.23971	265.553	4.75314	349.796	92.9993	24.5441	23.7728	1.61259	0.0533209	2.44798	23.767	1.62777	0.053517	4.11409	0.310469	4.42441	0.0420751	1.62777	0.367906	742.542	0.0819809	12.3403	1.47241	2.84862	0.892627	20.0065	6.44056	74.7493		129.569	241.166	44.3095	7494.37	0.360427	19.0689	0.345911	20.1309	3.22189	19.2474	15.8548	100.535	178.409	303.859	809.806
55-14.1	0.0482566	0.539081	482.497	279.369	268.332	3.48799	268.655	3.85294	265.132	37.9054	-1.22295	23.5162	1.31453	0.052023	1.32152	23.5296	1.31602	0.0515642	1.65168	0.302158	2.11186	0.0424996	1.31602	0.623158	842.741	0.389012	39.9627	0.791006	2.11729	0.589413	18.261	6.27015	77.7946		150.036	301.36	56.3491	10131.8	0.288945	38.6772	1.6414	65.192	1.73087	14.306	10.4691	91.7639	173.688	316.238	937.724
55-16.1	0.0229906	0.174728	451.81	371.185	268.945	1.69111	267.918	1.96372	268.252	42.332	-0.261942	23.4673	0.631546	0.0518343	1.31576	23.4732	0.636974	0.0516343	1.8456	0.303297	1.95243	0.0426018	0.636974	0.326248	1851.44	0.744882	29.9179	4.02171	7.51715	2.59045	51.3974	16.1452	177.169		309.936	596.07	111.193	8840.13	0.401723	9.28012	3.14296	48.8057	8.80023	50.7916	46.0115	258.279	447.235	720.199	1937.1
55-18.1	0.0370802	0.311648	434.619	313.419	269.127	1.69534	267.252	1.92523	202.224	59.0389	-33.5343	23.4479	0.63263	0.0519514	1.32352	23.4998	0.646607	0.0501777	2.54335	0.294408	2.62425	0.0425536	0.646607	0.246396	1769.8	0.118803	35.1268	2.00149	4.32828	1.59195	36.2301	12.7941	158.916		309.678	601.904	114.361	8157.72	0.387512	38.6741	0.501279	57.3032	4.37964	29.2451	28.2762	182.061	354.406	646	1935.49
55-8.1	-0.015982	-0.169348	337.432	199.014	269.196	5.20964	268.428	5.77356	297.788	45.777	9.73008	23.4541	1.9588	0.0515274	1.54542	23.4314	1.96066	0.0523053	2.00641	0.307786	2.80533	0.0426778	1.96066	0.698906	748.431	0.0415725	20.9832	0.804759	1.70709	0.62369	13.0379	5.11518	63.3351		136.193	321.659	63.6143	9254.06	0.402982	61.5896	0.175411	34.2303	1.76096	11.5344	11.078	65.517	141.695	257.46	851.203
55-5.1	0.160495	1.94087	471.966	240.284	270.048	4.00025	269.497	4.3378	-44.8832	98.5849	711.665	23.3373	1.49862	0.0529618	1.35874	23.563	1.51302	0.0452193	4.05504	0.264603	4.32812	0.0424394	1.51302	0.349579	1806.18	0.307291	31.9075	2.11973	4.34985	1.06356	38.3236	14.169	175.701		324.86	628.294	112.725	12077.2	0.251097	21.2251	1.29659	52.0514	4.63835	29.3909	18.891	192.581	392.492	714.232	2030.37
55-10.1	0.0484541	0.396582	361.536	289.635	270.897	1.71933	271.809	2.36767	275.884	58.2799	1.83219	23.2888	0.63541	0.0520825	1.54328	23.2968	0.648627	0.0518066	2.54439	0.306612	2.62577	0.0429244	0.648627	0.247024	1163.22	1.18768	30.7043	2.2501	3.83351	1.27564	27.724	9.37039	108.867		201.163	400.644	75.3021	8608.05	0.377181	10.0837	5.01133	50.0885	4.92363	25.9021	22.6579	139.317	259.568	442.547	1257.27
55-11.1	0.0816692	0.520286	463.071	455.095	272.42	4.10824	271.402	4.97547	203.907	51.3682	-34.0637	23.1481	1.52629	0.0523833	1.27754	23.2107	1.53027	0.0502141	2.21358	0.29829	2.69103	0.0430835	1.53027	0.568656	2345.93	0.258746	34.1398	4.34999	9.18474	3.15754	70.5081	22.4753	250.462		402.122	716.433	128.474	7487.68	0.378221	17.2763	1.09176	55.6929	9.51858	62.0591	56.0843	354.312	622.586	1018.14	2513.26
55-15.1	-0.0546466	-0.650024	243.043	129.117	274.046	4.259	273.505	4.59204	217.112	93.1594	-26.5861	23.0392	1.56114	0.0513267	3.30507	23.0629	1.56731	0.050501	4.02414	0.301917	4.31858	0.0433596	1.56731	0.362923	539.495	0.445427	21.8659	0.55934	1.48552	0.319002	12.409	4.41495	52.8643		95.2248	180.468	33.5505	10026.9	0.226483	23.5187	1.87944	35.6704	1.22394	10.0373	5.66611	62.3566	122.298	214.896	595.155
55-4.1	0.297012	3.08092	273.374	186.144	275.612	3.63757	279.313	4.07651	-133.09	185.795	311.611	22.825	1.32957	0.0541828	2.20936	23.1264	1.38165	0.0436214	7.5131	0.260071	7.63908	0.0432405	1.38165	0.180866	702.175	5.11361	24.2217	3.40715	0.650423	1.37932	19.4453	6.01477	66.91		121.562	273.349	53.6398	10582	1.18225	3.11542	21.5764	39.5134	7.45548	4.39475	24.4995	97.7149	166.614	271.992	759.761
55-7.1	0.00443877	0.0226179	829.205	1033.22	275.649	4.06225	274.902	5.57751	208.631	37.4736	-32.5701	22.8889	1.49254	0.0518368	1.01561	22.9323	1.49453	0.0503165	1.61622	0.302527	2.20131	0.0436067	1.49453	0.678927	3796.39	0.504588	81.5971	12.7371	21.4881	7.20456	124.93	38.6921	404.769		636.33	1164.96	206.652	8657.56	0.423862	17.2799	2.12906	133.111	27.8712	145.19	127.967	627.787	1071.8	1645.4	3977.06
55-9.1	0.122939	0.739984	859.18	905.467	276.144	3.3783	275.804	4.08516	172.87	44.661	-60.5799	22.8198	1.23853	0.0527986	0.98959	22.9124	1.24241	0.0495489	1.91364	0.29817	2.28158	0.0436445	1.24241	0.544541	4061.87	0.87632	75.306	9.56177	18.7369	6.39577	128.605	39.5518	429.654		687.697	1240.57	221.714	9097.12	0.397159	13.9669	3.69755	122.848	20.9229	126.601	113.602	646.255	1095.62	1746.56	4298.11
55-1.1	0.718537	8.17143	427.715	317.523	291.209	4.12621	302.145	4.73026	373.108	101.34	22.263	21.485	1.43141	0.0579236	1.80918	21.5888	1.4574	0.0540729	4.50156	0.345345	4.7316	0.0463204	1.4574	0.308013	1267.41	16.8779	46.0891	13.771	1.88127	3.55613	46.2802	10.3505	112.895		198.733	435.243	83.197	11161.4	1.16172	1.62304	71.2149	75.1861	30.1334	12.7113	63.1639	232.564	286.716	458.924	1242.08
55-13.1	5.0609	37.2511	667.925	890.872	340.645	2.6353	388.962	3.4865	#NUM!	#NUM!	#NUM!	17.4959	0.752718	0.0940479	1.85434	19.4247	1.38142	0.0097793	102.452	0.0694152	102.462	0.0514808	1.38142	0.0134823	1144.85	53.0855	78.5966	39.6388	15.0399	8.0215	73.235	11.0149	101.991		137.246	279.456	53.7558	9735.63	0.736755	0.919872	223.99	128.216	86.737	101.621	142.478	368.015	305.121	414.596	857.788
Spot Name	7-corr %com 206	7-corr %com 208	ppm U	ppm Th	207corr 206Pb /238U Age	1s err	208corr 206Pb /238U Age	1s err	204corr 207Pb /206Pb Age	1s err	% Dis- cor- dant	Total 238 /206	% err	Total 207 /206	% err	4corr 238 /206*	% err	4corr 207* /206*	% err	4corr 207* /235	% err	4corr 206* /238	% err	err corr	Y (ppm)	La (ppm)	Ce (ppm)	Nd (ppm)	Sm (ppm)	Eu (ppm)	Gd (ppm)	Tb (ppm)	Dy (ppm)		Er (ppm)	Yb (ppm)	Lu (ppm)	Hf (ppm)	Eu/ Eu*	Ce /Ce*	La (ch)	Ce (ch)	Nd (ch)	Sm (ch)	Eu (ch)	Gd (ch)	Tb (ch)	Dy (ch)	Er (ch)
08-15.1	0.273606	2.00824	310.772	268.396	252.324	4.49301	252.57	5.2755	367.878	65.3529	31.8005	24.9828	1.79984	0.0534693	1.65019	24.9679	1.8071	0.0539475	2.90033	0.297914	3.41724	0.0400514	1.8071	0.52882	1038.96	12.6462	28.6508	4.79036	4.55909	1.0287	31.2641	10.0025	108.879		174.737	286.976	49.8445	7685.94	0.262648	1.97626	53.3595	46.7387	10.4822	30.8046	18.2717	157.106	277.077	442.598	1092.11
08-2.1	0.436869	4.3056	72.2514	49.0551	254.439	2.59547	256.772	2.9665	340.824	231.149	25.6645	24.7305	1.00262	0.0548247	3.62469	24.7777	1.18612	0.0533052	10.2093	0.296627	10.278	0.0403589	1.18612	0.115405	694.445	0.137578	8.16158	1.10689	2.56353	1.45724	19.379	6.16999	68.5461		117.66	206.261	38.56	6412.68	0.630226	11.2284	0.580499	13.3142	2.42208	17.3211	25.8835	97.382	170.914	278.643	735.374
08-14.1	-0.013402	-0.0823411	217.371	213.452	258.307	7.48307	255.394	8.88872	258.162	85.2164	-0.056938	24.463	2.93216	0.0513037	1.83208	24.4599	2.93946	0.0514079	3.70852	0.289786	4.73218	0.0408833	2.93946	0.621163	1835.6	1.83324	22.9522	3.83659	8.02655	3.61516	61.0503	19.1906	204.463		299.342	466.308	79.4522	7000.98	0.497815	4.64638	7.73517	37.4425	8.39517	54.2335	64.2124	306.786	531.597	831.151	1870.89
08-5.1	4.00436	27.9477	133.701	136.355	260.654	6.81645	276.216	8.73677	258.702	383.948	-0.764058	23.2646	2.63259	0.0835561	2.73597	24.2364	2.82694	0.05142	16.7106	0.292526	16.9481	0.0412602	2.82694	0.1668	764.86	4.86594	17.4329	3.90082	3.98822	2.4396	26.1439	7.26816	78.7478		116.096	185.505	32.8994	7326.86	0.728271	2.14823	20.5314	28.4386	8.53572	26.9475	43.3322	131.377	201.334	320.113	725.601
08-6.1	0.0178661	0.190474	149.205	81.8606	263.496	2.03802	261.203	2.24931	-27.1873	168.957	1084.02	23.964	0.769615	0.0516706	2.29103	24.147	0.851584	0.0455502	6.97318	0.260092	7.02498	0.041413	0.851584	0.121222	832.882	0.16647	11.6941	0.702636	2.24532	0.733691	21.1006	7.50105	86.3569		142.599	240.875	41.8566	8690.3	0.324919	18.3572	0.702403	19.0768	1.5375	15.1711	13.0318	106.033	207.785	351.044	891.243
08-16.1	1.03041	6.08293	154.703	155.009	264.502	4.52043	263.091	5.66742	300.404	144.617	12.1085	23.6293	1.72398	0.0598099	2.16253	23.851	1.76564	0.0523653	6.34153	0.302718	6.58274	0.0419269	1.76564	0.268223	1532.85	0.504192	19.2375	1.79274	3.69455	2.29055	35.9985	12.5016	151.271		259.174	432.127	77.4376	7082.25	0.605431	10.8634	2.12739	31.3826	3.92284	24.9632	40.6846	180.897	346.304	614.921	1619.84
08-4.1	0.411388	2.71659	164.205	155.166	266.57	4.10338	266.356	4.8752	209.467	137.945	-27.6289	23.5888	1.55214	0.0548946	2.25423	23.7235	1.58879	0.0503346	5.9504	0.292542	6.15886	0.0421522	1.58879	0.257968	1751.15	0.400369	18.5261	4.2019	8.55231	4.31942	62.9027	19.1501	201.394		291.387	464.047	80.952	7239.86	0.567672	7.66836	1.68932	30.222	9.19452	57.7859	76.7214	316.094	530.474	818.675	1821.17
08-13.1	0.0209925	0.174073	291.84	223.286	266.861	3.33423	266.503	3.79513	157.158	66.5758	-70.7552	23.6549	1.26181	0.0517713	1.61452	23.7303	1.26948	0.0492169	2.84442	0.285965	3.11485	0.0421402	1.26948	0.407559	1784.94	11.4876	35.2642	5.0075	4.20156	2.66364	42.0018	14.2416	171.743		301.518	507.069	91.8831	6731.15	0.611203	2.4962	48.4711	57.5272	10.9573	28.3889	47.3116	211.064	394.505	698.143	1884.49
08-12.1	-0.191272	-1.14374	343.877	355.861	267.781	1.83382	265.407	2.20515	137.694	88.7811	-95.7708	23.622	0.665509	0.0500902	3.15592	23.6597	0.675832	0.04881	3.77952	0.284447	3.83947	0.042266	0.675832	0.176022	2791.37	1.25993	33.3287	4.61186	10.0931	5.20887	86.7442	27.7148	302.811		458.819	719.148	123.746	7431.19	0.53661	7.423	5.31615	54.3698	10.0916	68.1969	92.5198	435.901	767.722	1230.94	2867.62
08-9.1	-0.0573807	-0.452847	151.501	121.512	268.231	2.17129	267.551	2.53199	335.152	107.387	20.2321	23.5501	0.804518	0.0511738	2.51414	23.4914	0.848909	0.0531719	4.73823	0.312086	4.81367	0.0425687	0.848909	0.176354	1177.69	0.0320193	17.6436	1.28051	3.10488	1.72999	29.8187	9.92717	115.63		201.044	343.001	62.977	7230.9	0.548057	46.7801	0.135103	28.7823	2.80199	20.9789	30.7281	149.843	274.991	470.042	1256.52
08-11.1	0.0956016	0.986581	165.799	96.0475	268.868	3.54063	267.191	3.90131	73.0549	160.166	-271.766	23.4572	1.32541	0.0524148	2.38632	23.6013	1.37474	0.047493	6.7369	0.277457	6.87573	0.0423706	1.37474	0.199941	873.78	0.684465	14.3468	1.10955	2.54472	0.91294	22.2739	7.39836	87.3999		149.225	258.199	47.2156	9309.95	0.369636	8.83847	2.88804	23.4042	2.42789	17.194	16.2156	111.929	204.941	355.284	932.659
08-7.1	-0.019599	-0.124002	171.711	167.742	269.296	2.99966	267.417	3.59849	299.303	70.4701	10.1598	23.4461	1.12003	0.0515007	2.1983	23.4216	1.12929	0.0523401	3.08954	0.30812	3.28946	0.0426957	1.12929	0.343304	2061.02	0.152183	20.4677	4.87605	11.2368	5.4914	72.6288	22.6828	239.395		342.511	542.961	94.2198	7700.77	0.585944	12.7563	0.642121	33.3894	10.6697	75.9242	97.5381	364.969	628.333	973.152	2140.7
08-10.1	-0.0852079	-0.744354	148.129	106.786	269.701	5.37713	268.828	6.07192	313.391	104.257	14.1273	23.4255	2.01541	0.0509837	2.28204	23.3764	2.03265	0.0526648	4.58236	0.31063	5.01295	0.0427782	2.03265	0.405481	1214.59	0.0421187	16.6056	1.16831	2.9223	1.57202	26.1374	9.33238	115.402		213.951	375.486	67.6411	7210.53	0.548296	40.1892	0.177716	27.0891	2.55648	19.7453	27.9222	131.344	258.515	469.112	1337.19
08-8.1	1.3529	7.87779	136.938	133.903	276.541	6.10377	273.94	7.3941	16.6676	277.98	-1581.67	22.5058	2.22769	0.062674	2.66253	22.969	2.31509	0.0463857	11.5689	0.278447	11.7982	0.0435369	2.31509	0.196223	1218.15	123.657	83.9553	29.0508	4.23454	4.05377	51.4605	13.3811	137.456		195.665	311.044	54.7106	6697.26	0.837083	0.752024	521.758	136.958	63.5686	28.6118	72.0031	258.596	370.667	558.765	1222.9
08-3.1	1.70311	10.262	90.3258	82.3996	308.672	6.72701	305.195	8.09572	-935.952	990.868	135.403	20.0411	2.18981	0.0662428	3.77847	20.9014	2.54261	0.0323318	33.9014	0.213283	33.9966	0.0478437	2.54261	0.07479	954.626	7.19089	12.8195	3.3374	3.79112	2.97135	33.3159	9.63739	102.442		153.708	248.23	44.4363	6924.21	0.805921	1.40491	30.3413	20.9127	7.30283	25.6157	52.777	167.417	266.964	416.431	960.675
08-1.1	2.17606	46.7344	259.097	55.945	311.354	5.19736	313.916	5.44185	920.649	45.6889	67.0635	19.7687	1.6896	0.0701083	1.51151	19.7772	1.69571	0.0697684	2.22245	0.4864	2.79548	0.0505632	1.69571	0.60659	613.505	0.182646	18.3406	0.209492	0.876403	0.215569	8.6814	3.64049	54.1328		108.316	206.524	35.1182	10648.2	0.238225	50.3381	0.770659	29.9195	0.458408	5.92164	3.82893	43.6251	100.845	220.052	676.973
Spot Name	7-corr %com 206	7-corr %com 208	ppm U	ppm Th	207corr 206Pb /238U Age	1s err	20Xcorr 207Pb /235U Age	1s err	204corr 207Pb /206Pb Age	1s err	% Dis- cor- dant	Total 238 /206	% err	Total 207 /206	% err	4corr 238 /206*	% err	4corr 207* /206*	% err	4corr 207* /235	% err	4corr 206* /238	% err	err corr	Y (ppm)	La (ppm)	Ce (ppm)	Nd (ppm)	Sm (ppm)	Eu (ppm)	Gd (ppm)	Tb (ppm)	Dy (ppm)		Er (ppm)	Yb (ppm)	Lu (ppm)	Hf (ppm)	Eu/ Eu*	Ce /Ce*	La (ch)	Ce (ch)	Nd (ch)	Sm (ch)	Eu (ch)	Gd (ch)	Tb (ch)	Dy (ch)	Er (ch)
60-4.1	5.65325	45.8368	304.575	257.804	257.312	9.72583			258.574	387.651	0.494361	23.168	3.81795	0.0966875	2.22865	24.5554	3.95824	0.0514171	16.8714	0.28871	17.3295	0.0407243	3.95824	0.22841	934.584	26.3263	70.461	23.908	3.01373	4.0274	43.2258	8.81817	86.629		131.401	255.789	48.8928	10792.6	1.0756	1.50784	111.081	114.945	52.315	20.363	71.5347	217.215	244.271	352.151	821.258
60-3.1	0.0649529	0.683494	462.181	274.425	261.247	3.05884			249.079	49.898	-4.94936	24.1632	1.18279	0.0519976	1.38236	24.1871	1.18748	0.0512053	2.16794	0.291898	2.47186	0.0413443	1.18748	0.480401	1374.64	0.193601	21.2964	1.71722	3.43041	1.16079	26.9201	9.7201	123.602		242.759	479.128	91.9945	8014.53	0.368208	19.8295	0.816882	34.7413	3.75758	23.1784	20.618	135.277	269.255	502.448	1517.24
60-8.1	0.868567	5.45768	332.14	308.104	261.529	3.57807			278.786	147.249	6.27099	23.9425	1.34	0.0584447	4.81722	24.1406	1.35776	0.0518723	6.43195	0.29627	6.5737	0.041424	1.35776	0.206544	859.95	2.06815	33.8009	4.37535	5.00243	1.573	26.1493	7.71486	83.0613		144.965	293.787	56.8183	9936.73	0.419234	6.03258	8.72636	55.1402	9.57407	33.8002	27.9396	131.404	213.708	337.648	906.029
60-5.1	0.159968	0.737685	984.92	1335.88	263.207	3.07268			331.423	27.3746	20.8506	23.9568	1.18091	0.0528032	1.01102	23.9484	1.18174	0.0530845	1.20705	0.305627	1.68923	0.0417564	1.18174	0.699575	3359.54	0.864171	156.07	11.7349	21.3038	9.89978	126.953	35.7053	371.793		550.359	978.616	171.8	8267.46	0.580263	26.312	3.64629	254.601	25.678	143.945	175.84	637.955	989.066	1511.35	3439.75
60-11.1	0.195434	2.44702	211.595	104.679	263.937	2.89426			240.908	90.6082	-9.68605	23.8807	1.10374	0.0531039	1.91959	23.9428	1.12451	0.0510239	3.93088	0.293833	4.08857	0.0417662	1.12451	0.275038	1417.06	0.0980058	8.65898	0.987237	2.68901	1.38437	28.1933	10.9189	135.941		257.414	483.017	90.8516	6657.54	0.484655	14.9452	0.413527	14.1256	2.16026	18.169	24.5892	141.675	302.462	552.605	1608.84
60-1.1	0.109877	4.09267	677.068	120.338	266.708	1.92361			264.591	36.0292	-0.81085	23.6477	0.72743	0.0524805	1.08064	23.6752	0.730977	0.051552	1.56977	0.30023	1.73162	0.0422384	0.730977	0.422135	2725.85	0.115027	6.95977	0.311249	1.94899	0.407069	28.8137	15.3509	225.673		522.518	1121.54	210.393	13482.2	0.165582	19.7475	0.485345	11.3536	0.68107	13.1688	7.23035	144.792	425.233	917.37	3265.74
60-14.1	0.0636108	0.638595	381.336	239.141	267.596	4.31685			280.105	42.8969	4.52545	23.5785	1.63221	0.0521296	1.41146	23.5852	1.63414	0.0519021	1.87422	0.303421	2.48659	0.0423994	1.63414	0.657182	921.227	0.0870126	11.4733	1.06559	2.44265	0.670231	19.4682	7.30536	87.3938		163.197	313.863	57.2642	7703.58	0.296264	20.2289	0.367142	18.7166	2.33171	16.5044	11.9046	97.8304	202.365	355.26	1019.98
60-6.1	0.0625008	0.939626	275.291	113.435	267.717	1.79398			254.724	62.7313	-5.16922	23.5679	0.669698	0.0521234	1.72895	23.5912	0.682887	0.0513311	2.7283	0.300007	2.81247	0.0423887	0.682887	0.242807	288.099	0.0220947	15.9755	0.316133	0.62499	0.360511	5.6214	2.08227	25.1572		51.0637	124.502	26.3139	9711.87	0.586284	102.623	0.0932268	26.0611	0.691756	4.22291	6.40339	28.2483	57.6807	102.265	319.148
60-13.1	0.232838	1.61461	502.052	454.91	269.087	1.66592			294.762	43.8242	8.82697	23.4055	0.622172	0.0535201	1.21164	23.443	0.629437	0.052236	1.91978	0.307226	2.02033	0.0426566	0.629437	0.311552	3411.67	2.35877	20.576	10.0504	17.8239	2.79654	129.666	38.8692	408.995		582.291	907.124	155.839	9932.03	0.17732	2.26881	9.95264	33.566	21.992	120.431	49.6722	651.587	1076.71	1662.58	3639.32
60-15.1	0.128582	0.990479	432.3	350.258	271.718	3.62587			276.232	60.6556	1.65617	23.1983	1.34511	0.0527436	2.15108	23.2252	1.34853	0.0518144	2.64828	0.307604	2.97185	0.0430567	1.34853	0.453768	1691.65	0.303409	22.4115	4.12529	8.08588	2.43435	53.934	16.6139	181.039		280.638	499.041	89.0581	8789.28	0.355335	10.7548	1.28021	36.5604	9.02689	54.6343	43.2389	271.025	460.219	735.93	1753.99
60-7.1	0.145826	1.15983	429.358	335.129	273.258	2.92949			277.252	47.6213	1.46024	23.0608	1.08293	0.0529167	1.36782	23.0919	1.08749	0.0518375	2.07957	0.309518	2.34675	0.0433052	1.08749	0.463404	903.861	0.455956	44.9196	1.27858	2.87988	0.795089	22.0376	7.7778	90.0912		156.612	304.632	56.6872	11114.9	0.304226	31.5851	1.92387	73.2783	2.79777	19.4586	14.1224	110.741	215.451	366.224	978.826
60-16.1	-0.0224762	-0.256362	368.969	200.607	275.363	4.5485			195.238	48.3176	-41.6122	22.9194	1.67226	0.0516145	1.35509	22.9647	1.67499	0.050027	2.07882	0.300362	2.66966	0.0435451	1.67499	0.627416	1273.57	0.0524403	31.7624	1.09944	2.86622	1.71436	25.6477	9.33172	114.651		220.95	467.11	89.9277	8405.45	0.609498	71.0176	0.221267	51.8147	2.40579	19.3664	30.4505	128.883	258.496	466.062	1380.93
60-2.1	3.24855	22.07	573.176	508.444	285.083	4.76314			518.686	106.781	45.6473	21.3977	1.69027	0.0780869	1.19191	21.9586	1.72245	0.0577329	4.86456	0.362511	5.1605	0.0455403	1.72245	0.333777	773.86	52.8617	214.106	38.4508	11.2239	6.82817	50.924	11.8291	96.9564		121.829	257.151	52.6991	12414.1	0.870602	2.54964	223.045	349.276	84.1374	75.8374	121.282	255.899	327.675	394.132	761.43
60-12.1	0.134437	1.27641	455.484	293.979	295.446	1.89996			295.168	65.9387	-0.0952671	21.2944	0.631753	0.0533313	2.45542	21.3233	0.638568	0.0522453	2.88874	0.337827	2.95848	0.0468971	0.638568	0.215843	1109.02	0.571772	44.6667	2.89242	5.40749	2.66521	34.9944	11.1831	122.904		195.992	367.918	65.3592	12165	0.590587	18.6472	2.41254	72.8658	6.32914	36.5371	47.3395	175.851	309.78	499.609	1224.95
60-10.1	0.520242	7.7557	419.169	169.53	351.014	8.163			332.504	55.6831	-5.66263	17.7767	2.36408	0.057737	1.11038	17.8793	2.36826	0.0531098	2.45575	0.409567	3.41165	0.0559305	2.36826	0.694168	950.858	4.11549	25.8676	3.65724	3.43554	1.04005	18.5984	6.13956	77.4174		183.288	499.356	109.314	11562.5	0.396616	3.57965	17.3649	42.1984	8.00272	23.2131	18.4734	93.4592	170.071	314.705	1145.55
60-9.1	0.122818	2.69147	152.459	47.3103	450.08	3.76292			492.859	50.3294	8.86315	13.8117	0.8456	0.0569618	1.68524	13.81	0.852573	0.0570591	2.28272	0.569683	2.43674	0.0724113	0.852573	0.349883	1778.41	0.0432787	1.96151	1.41123	3.86095	0.260138	40.6804	14.9189	181.603		314.108	556.197	98.4852	10124.1	0.0632722	4.26114	0.18261	3.19985	3.08803	26.0875	4.62057	204.424	413.267	738.223	1963.17
Spot Name	7-corr %com 206	7-corr %com 208	ppm U	ppm Th	207corr 206Pb /238U Age	1s err			204corr 207Pb /206Pb Age	1s err	% Dis- cor- dant	Total 238 /206	% err	Total 207 /206	% err	4corr 238 /206*	% err	4corr 207* /206*	% err	4corr 207* /235	% err	4corr 206* /238	% err	err corr	Y (ppm)	La (ppm)	Ce (ppm)	Nd (ppm)	Sm (ppm)	Eu (ppm)	Gd (ppm)	Tb (ppm)	Dy (ppm)	Ho (ppm)	Er (ppm)	Yb (ppm)	Lu (ppm)	Hf (ppm)	Eu (star)	Ce (star)	La (ch)	Ce (ch)	Nd (ch)	Sm (ch)	Eu (ch)	Gd (ch)	Tb (ch)	Dy (chn)	Er (ch)
BLOU-2.1	-0.120932	-1.15496	176.687	111.735	269.58	3.66294			64.8938	106.112	-319.854	23.4446	1.36837	0.0506822	2.49852	23.5412	1.38381	0.0473304	4.45648	0.277212	4.66638	0.0424787	1.38381	0.296548	204.324	0.00680114	18.2361	0.184933	0.382123	0.224609	4.89755	1.42904	15.6743	7.06632	34.3803	82.6412	18.1032	10463.4	0.500478	137.293	0.0286968	29.7489	0.404666	2.58191	3.9895	24.6108	39.5857	63.7165	214.877
BLOU-3.1	-0.0419438	-0.386383	539.386	370.116	270.933	2.12801			229.418	39.3088	-18.3443	23.3067	0.790656	0.0513541	1.47673	23.3234	0.792286	0.0507705	1.7018	0.300138	1.87719	0.0428754	0.792286	0.42206	1624.3	0.0383816	36.2401	2.17195	5.59473	0.522514	48.588	16.1102	170.031	68.6552	287.812	444.33	75.4392	9009.29	0.0966036	24.0587	0.161948	59.1192	4.75263	37.8022	9.28089	244.161	446.265	691.181	1798.82
BLOU-7.1	0.181098	3.78626	448.079	142.034	271.875	2.99122			321.363	38.5135	15.6082	23.1724	1.11056	0.0531865	1.56017	23.182	1.11134	0.0528498	1.69517	0.314335	2.02699	0.0431369	1.11134	0.548271	567.842	0.670362	27.0634	2.51272	1.915	0.634199	10.8872	4.09793	52.093	20.7276	103.953	243.393	46.7341	11198.6	0.423382	10.6041	2.82853	44.149	5.49829	12.9392	11.2646	54.7095	113.516	211.76	649.708
BLOU-13.1	-0.123106	-1.17326	169.354	108.894	275.344	5.32326			321.964	87.715	14.6785	22.944	1.95215	0.0507948	2.8169	22.8856	1.96043	0.0528637	3.86119	0.31849	4.33037	0.0436956	1.96043	0.452717	480.456	0.015522	26.4362	0.518189	1.61365	0.346688	13.0245	4.22822	47.8915	18.615	81.5778	150.541	27.8154	10116.4	0.230517	71.9132	0.0654937	43.1259	1.13389	10.903	6.15786	65.4497	117.125	194.681	509.861
BLOU-9.1	0.00588957	0.048199	501.083	378.77	275.953	2.12295			264.758	36.7894	-4.2875	22.8627	0.774202	0.0518559	1.48418	22.8712	0.775085	0.0515558	1.60294	0.310806	1.7805	0.0437231	0.775085	0.435319	956.471	0.0203401	56.3352	0.609496	2.12939	0.824095	19.5829	7.45228	82.3697	36.791	175.768	356.894	68.6119	10541.5	0.389009	129.482	0.0858233	91.9009	1.33369	14.3878	14.6376	98.4066	206.434	334.836	1098.55
BLOU-14.1	2.23278	11.5771	270.698	286.074	276.505	6.67255			568.384	289.086	52.0253	22.308	2.26728	0.0699483	10.436	22.614	2.29023	0.0590606	13.2814	0.360099	13.4774	0.0442204	2.29023	0.169931	1552.04	0.346747	55.2719	3.18396	6.59321	2.51307	46.2337	14.7127	163.073	62.2521	273.072	502.822	91.959	8680.4	0.438759	21.3914	1.46307	90.1662	6.96708	44.5487	44.6371	232.33	407.554	662.898	1706.7
BLOU-8.1	0.127092	1.46042	290.153	157.387	277.63	2.29867			344.397	48.1432	19.6536	22.6941	0.830121	0.0528779	1.91968	22.6798	0.832515	0.0533894	2.12771	0.324576	2.28479	0.0440921	0.832515	0.364373	486.442	0.0221127	33.3431	0.460939	1.14042	0.646121	10.1951	3.62582	40.934	17.8809	88.3167	208.086	41.7691	9671.47	0.577609	98.7244	0.0933024	54.3933	1.00862	7.70557	11.4764	51.2317	100.438	166.398	551.98
BLOU-5.1	-0.0610852	-0.590888	264.845	170.588	278.562	2.41433			202.913	100.149	-37.8102	22.6592	0.843805	0.0513713	3.88457	22.6921	0.85002	0.0501926	4.31485	0.304977	4.39778	0.0440682	0.85002	0.193284	455.272	0.407611	27.4836	0.542123	0.990104	0.307128	8.86372	3.21984	41.0404	16.6672	82.7061	186.102	36.5055	9936.34	0.316024	30.855	1.71988	44.8345	1.18627	6.68989	5.45521	44.5413	89.1921	166.831	516.913
BLOU-6.1	0.149589	2.49069	350.855	126.084	284.11	2.24863			54.3732	92.5255	-428.78	22.1604	0.794918	0.0532073	1.70268	22.3267	0.81822	0.0471219	3.87819	0.291004	3.96356	0.0447893	0.81822	0.206435	633.527	0.666876	27.6421	1.70054	1.89945	0.671193	12.1568	4.45335	58.786	24.0091	116.796	271.563	53.9782	8475.65	0.425768	13.8007	2.81382	45.0932	3.72108	12.8341	11.9217	61.0896	123.362	238.967	729.977
BLOU-15.1	0.182427	1.7846	207.878	129.839	288.602	9.35993			352.283	150.483	18.3347	21.8006	3.26043	0.0535759	6.65998	21.8006	3.26043	0.0535759	6.65998	0.338847	7.41524	0.0458704	3.26043	0.439693	387.162	0.028287	22.0765	0.377592	0.952551	0.536034	7.24434	2.69169	31.1162	13.569	68.9254	164.937	35.2911	9475.94	0.622011	76.172	0.119354	36.0139	0.82624	6.43616	9.52104	36.4037	74.562	126.488	430.784
BLOU-17.1	-0.0491416	-0.463981	81.5304	54.8337	288.959	5.34952			271.372	85.9522	-6.57488	21.8235	1.86284	0.0517046	3.74946	21.8235	1.86284	0.0517046	3.74946	0.326667	4.18672	0.0458221	1.86284	0.444941	202.655	0.0114341	15.0314	0.466132	0.916943	0.48775	5.6999	1.75099	19.8706	7.5646	34.7873	76.7936	15.3671	8788.06	0.650341	45.9098	0.0482452	24.5211	1.01998	6.19556	8.66341	28.6427	48.5038	80.7749	217.42
BLOU-16.1	-0.0370411	-0.327453	141.934	97.7217	301.861	2.94279			198.194	93.3001	-53.1078	20.8672	0.973992	0.0520983	2.72269	20.9188	0.989573	0.0500907	4.01633	0.330158	4.13644	0.0478038	0.989573	0.239233	656.033	0.0143902	14.954	1.23309	2.49542	0.772819	18.0377	6.16808	61.9407	25.8033	119.824	206.187	38.2319	9402.39	0.351127	17.6842	0.0607183	24.3948	2.69823	16.8609	13.7268	90.6419	170.861	251.792	748.899
BLOU-19.1	0.181916	1.94719	256.013	146.257	371.663	4.11781			316.509	65.1185	-17.7442	16.8189	1.12129	0.0555112	1.78557	16.8767	1.13002	0.052737	2.86371	0.430854	3.0786	0.0592534	1.13002	0.367056	700.923	0.748979	20.6664	1.97231	2.52083	0.658012	16.2035	5.58588	67.8861	27.8666	126.016	249.652	46.6736	7207.03	0.313839	9.0191	3.16025	33.7135	4.31578	17.0326	11.6876	81.4246	154.734	275.96	787.603
BLOU-24.1	1.94312	17.6983	128.134	71.3588	375.896	3.87247			211.831	219.41	-78.9115	16.3307	1.0285	0.0698709	2.34579	16.7316	1.16587	0.050386	9.46859	0.415217	9.5401	0.0597673	1.16587	0.122208	487.744	2.0218	13.1676	1.24074	2.00789	0.576921	14.743	4.77053	52.5677	20.0458	88.0328	155.147	27.5738	7598.9	0.323223	3.82021	8.53078	21.4806	2.71496	13.5668	10.2473	74.0856	132.148	213.69	550.205
BLOU-1.1	0.024055	9.29561	474.42	10.3173	410.533	5.2093			401.04	30.2029	-2.41365	15.2042	1.29123	0.0551769	1.21985	15.2122	1.29177	0.0547497	1.34823	0.496238	1.86718	0.0657366	1.29177	0.691827	550.294	0.273706	1.63202	0.58091	0.60018	0.225283	6.54801	3.26488	42.349	20.7493	113.297	362.716	74.6163	12477.8	0.346403	2.19483	1.15488	2.66234	1.27114	4.05527	4.00147	32.9046	90.44	172.15	708.104
BLOU-10.1	0.247878	73.5927	430.606	8.55979	478.923	3.72679			547.264	26.9316	12.763	12.9343	0.790947	0.0587004	1.17541	12.9376	0.791374	0.0584913	1.23289	0.623358	1.46503	0.0772938	0.791374	0.540177	1373.19	0.0404736	0.844078	0.133132	0.671249	0.163827	10.0723	7.05861	112.976	52.1064	267.733	639.71	112.651	12940.4	0.192057	5.95968	0.170775	1.37696	0.291318	4.53546	2.90989	50.6144	195.529	459.251	1673.33
BLOU-20.1	-0.0376313	-0.925691	350.44	90.2656	492.775	4.05749			445.43	38.3389	-10.875	12.593	0.836273	0.0567534	1.42442	12.6071	0.838769	0.0558497	1.7247	0.610812	1.91785	0.0793205	0.838769	0.437349	2249.38	0.0217245	8.60403	1.16947	3.70226	0.581744	43.1378	16.9203	203.407	85.9587	405.134	748.89	131.806	10184.9	0.14032	10.5905	0.0916644	14.0359	2.55901	25.0153	10.3329	216.773	468.705	826.856	2532.08
BLOU-4.1	1.26261	17.2659	385.426	169.008	509.84	7.3218			482.203	104.182	-5.86706	11.9972	1.4447	0.0676802	3.18636	12.1614	1.45737	0.0567843	4.7166	0.643793	4.93662	0.0822275	1.45737	0.295216	1509.94	28.2641	177.485	46.9495	23.1543	4.92936	55.5297	16.6296	165.636	63.559	282.166	479.289	84.4668	10256.9	0.419045	2.60852	119.258	289.535	102.734	156.448	87.5552	279.044	460.655	673.317	1763.54
BLOU-21.1	0.0747306	2.01291	201.549	47.9962	529.233	9.52721			461.628	58.2654	-15.0052	11.6788	1.83933	0.0586134	1.76066	11.7129	1.84397	0.0562587	2.62848	0.662255	3.21078	0.0853757	1.84397	0.574306	1265.89	0.242862	9.74577	0.875247	2.57775	0.322827	23.2943	10.128	118.368	52.0249	230.993	431.501	76.9994	10056.5	0.126991	10.8155	1.02473	15.8985	1.9152	17.4172	5.73404	117.057	280.555	481.17	1443.71
BLOU-25.1	0.714706	13.8847	356.685	112.006	541.854	9.81395			482.425	95.9159	-12.6269	11.3225	1.83865	0.0641027	3.14392	11.426	1.84676	0.05679	4.34252	0.685296	4.7189	0.0875196	1.84676	0.391354	807.522	0.749579	11.3018	1.8249	2.00942	0.42093	14.4946	5.69821	69.4392	30.3522	150.461	305.154	59.3971	10280.3	0.237749	5.15282	3.16278	18.4368	3.99322	13.5772	7.47655	72.8373	157.845	282.273	940.383
BLOU-12.1	0.0626	1.29079	307.277	95.6933	544.244	4.39486			545.195	30.3574	0.178709	11.3446	0.822409	0.0589147	1.25154	11.3514	0.823484	0.058436	1.38923	0.709795	1.61496	0.088095	0.823484	0.50991	604.924	0.0179689	11.6877	0.287585	0.957272	0.0728345	10.2837	4.44634	57.1023	24.1002	114.604	223.803	40.7573	10743.2	0.0707608	54.0807	0.075818	19.0663	0.629289	6.46805	1.29369	51.6771	123.167	232.123	716.275
BLOU-26.1	0.101817	0.779867	208.718	174.617	561.727	7.71364			574.821	41.7796	2.33552	10.9721	1.40206	0.0596998	1.73966	10.9785	1.40325	0.0592356	1.92155	0.743948	2.37938	0.0910873	1.40325	0.589754	942.703	0.0915834	30.5948	2.61336	4.32211	2.35825	35.092	9.98157	97.2475	36.1975	158.266	261.665	47.0779	7871.27	0.583697	16.3507	0.386428	49.91	5.71851	29.2034	41.8872	176.342	276.498	395.315	989.161
BLOU-18.1	-0.247149	-2.97015	54.0002	27.617	798.053	10.4718			831.32	73.9829	4.12746	7.60674	1.33873	0.0637948	2.53279	7.57796	1.35644	0.0668219	3.5486	1.21582	3.79901	0.131962	1.35644	0.357052	512.566	0.0223625	11.4543	0.493989	1.3812	0.249943	11.5679	4.53421	52.9389	21.037	92.471	167.073	29.6407	8906.99	0.190605	31.7974	0.0943564	18.6857	1.08094	9.33243	4.43949	58.1302	125.601	215.199	577.944
BLOU-23.1	-0.103432	-2.27372	171.045	53.2773	1125.44	10.5546			1097.97	23.4535	-2.58931	5.24786	0.96393	0.0763845	1.1245	5.24947	0.964417	0.0761433	1.17203	1.99994	1.51781	0.190495	0.964417	0.635399	606.562	0.0446056	15.9315	0.461933	1.50238	0.465765	10.5748	4.20644	52.1618	21.4236	112.104	274.118	58.0379	9363.61	0.356197	43.3517	0.188209	25.9894	1.01079	10.1512	8.27291	53.1398	116.522	212.04	700.647
BLOU-11.1	7.84352	109.589	408.705	217.233	3123.11	51.2423			3412.34	7.16188	3.12451	1.47848	0.793689	0.289455	0.458957	1.47928	0.793791	0.289145	0.460394	26.9505	0.917642	0.676006	0.793791	0.865034	1089.68	0.280105	28.1018	1.81209	3.12601	0.565281	25.4331	8.92785	99.959	42.0188	192.797	349.632	64.0402	9482.33	0.19325	17.8133	1.18188	45.843	3.96519	21.1217	10.0405	127.804	247.309	406.338	1204.98
BLOU-22.1	9.43386	233.093	65.4133	20.4566	3132.01	83.5668			3470.68	8.27458	3.22075	1.44776	1.29307	0.300587	0.528541	1.4487	1.29362	0.30022	0.534212	28.5735	1.39958	0.690274	1.29362	0.924289	621.903	0.0148941	20.9448	0.347691	1.28294	0.495704	12.8968	4.74462	69.8647	24.0285	87.8385	219.457	40.4636	9818.96	0.371473	82.966	0.0628444	34.1677	0.760811	8.66853	8.80469	64.8079	131.43	284.003	548.99
Spot Name	7-corr %com 206	7-corr %com 208	ppm U	ppm Th	207corr 206Pb /238U Age	1s err	208corr 206Pb /238U Age	1s err	204corr 207Pb /206Pb Age	1s err	% Dis- cor- dant	Total 238 /206	% err	Total 207 /206	% err	4corr 238 /206*	% err	4corr 207* /206*	% err	4corr 207* /235	% err	4corr 206* /238	% err	err corr	Y (ppm)	La (ppm)	Ce (ppm)	Nd (ppm)	Sm (ppm)	Eu (ppm)	Gd (ppm)	Tb (ppm)	Dy (ppm)	Ho (ppm)	Er (ppm)	Yb (ppm)	Lu (ppm)	Hf (ppm)	Eu (star)	Ce (star)	La (ch)	Ce (ch)	Nd (ch)	Sm (ch)	Eu (ch)	Gd (ch)	Tb (ch)	Dy (chn)	Er (ch)
13ZA93A-7.1	0.643517	8.16252	593.929	282.633	268.602	2.11044	268.959	2.29177	276.714	64.8121	2.97087	23.3521	0.789636	0.056802	1.43811	23.4979	0.804043	0.0518253	2.82999	0.304098	2.942	0.0425569	0.804043	0.273298	799.164	13.9984	96.6578	19.8807	12.0502	3.22895	24.4391	8.08275	88.0082	29.2457	133.16	282.646	54.8607	11565.9	0.573549	3.11066	59.0651	157.68	43.5026	81.4201	57.3525	122.81	223.899	357.757	832.249
13ZA93A-4.1	0.0204794	0.148047	616.931	512.845	279.865	3.33339	277.104	3.8443	294.539	745.228	5.0515	22.533	1.19361	0.052061	2.8335	22.5282	2.43122	0.0522309	32.6444	0.31967	32.7348	0.0443887	2.43122	0.0742704	680.408	0.206958	61.0726	1.20157	2.30497	1.09724	16.8925	5.75247	65.5778	25.3502	115.03	241.673	48.0402	10739.4	0.536009	65.751	0.873238	99.629	2.62926	15.5741	19.4892	84.887	159.348	266.576	718.939
13ZA93A-6.1	-0.109077	-1.33138	289.591	153.04	482.68	4.02045	481.555	4.356	456.621	872.826	-5.83673	12.8757	0.845283	0.0559111	1.52618	12.8722	2.84462	0.0561318	39.3409	0.601252	39.4436	0.0776866	2.84462	0.0721186	1604.95	0.0293106	10.0285	1.59949	4.42401	0.621739	39.6268	13.3587	153.492	63.7744	273.957	449.237	79.8093	8975.9	0.143138	24.8661	0.123673	16.3598	3.49997	29.892	11.0433	199.129	370.047	623.95	1712.23
13ZA93A-5.1	-0.0610787	-5.27366	756.226	54.2258	488.334	4.06508	487.744	4.04086	472.231	323.496	-3.4881	12.7149	0.849006	0.0564462	0.927513	12.7136	1.32345	0.0565287	14.6203	0.613057	14.6801	0.0786558	1.32345	0.0901525	3487.64	0.00352291	2.0909	0.354064	2.17567	0.201973	32.4153	18.9424	275.668	129.668	668.969	1498.3	272.635	12641.4	0.0733111	31.7844	0.0148646	3.41094	0.774758	14.7005	3.58744	162.891	524.721	1120.6	4181.06
13ZA93A-1.1	0.0936886	1.40545	291.56	123.48	514.7	6.07435	514.008	6.42015	507.419	35.6995	-1.46923	12.02	1.2043	0.0583901	1.3705	12.0341	1.20572	0.0574376	1.62321	0.658089	2.02203	0.0830973	1.20572	0.596294	1720.12	4.55343	11.3206	3.4256	4.9216	1.02284	41.0189	14.2424	162.809	69.0426	301.312	515.506	93.0865	7662.47	0.219438	1.53888	19.2128	18.4675	7.49584	33.254	18.1676	206.125	394.527	661.826	1883.2
13ZA93A-2.1	0.26078	20.3274	133.718	11.542	571.187	5.87947	572.749	5.89228	640.886	40.6851	11.1525	10.7652	1.04671	0.0612645	1.85971	10.7678	1.04697	0.0610735	1.89201	0.782039	2.16237	0.0928699	1.04697	0.484177	489.469	0.00911568	23.8345	0.225624	0.959077	0.270325	8.80966	4.06649	53.0829	24.432	120.825	300.711	59.623	9380.73	0.283485	282.156	0.0384628	38.8817	0.493707	6.48025	4.80152	44.2697	112.645	215.784	755.158
13ZA93A-3.1	0.0230756	0.2741	124.015	67.6767	590.052	5.7419	589.134	6.17548	609.359	1242.02	3.25221	10.4304	0.989571	0.0598411	1.8682	10.426	4.34837	0.0601869	57.456	0.795952	57.6203	0.0959144	4.34837	0.0754659	342.777	0.0161515	19.6737	0.82085	1.84875	0.38443	11.6118	3.86583	38.0758	13.9407	56.8513	91.4573	16.429	8405.88	0.252917	91.7319	0.0681497	32.0942	1.79617	12.4916	6.82824	58.3507	107.087	154.78	355.321
13ZA93A-8.1	0.3282	6.39831	279.866	78.0885	793.597	13.1799	788.274	13.8159	875.947	21.9151	9.70142	7.60824	1.71298	0.0683396	1.05295	7.60886	1.71299	0.0682728	1.0586	1.23717	2.0137	0.131426	1.71299	0.850672	1758	0.0823828	11.5331	1.00513	3.37148	1.78313	38.3214	15.0076	169.872	70.7778	307.133	523.793	91.7701	10475.9	0.478192	21.5174	0.347607	18.8143	2.19941	22.7803	31.672	192.57	415.722	690.537	1919.58
Spot Name	7-corr %com 206	7-corr %com 208	ppm U	ppm Th	207corr 206Pb /238U Age	1s err	208corr 206Pb /238U Age	1s err	204corr 207Pb /206Pb Age	1s err	% Dis- cor- dant	Total 238 /206	% err	Total 207 /206	% err	4corr 238 /206*	% err	4corr 207* /206*	% err	4corr 207* /235	% err	4corr 206* /238	% err	err corr	Y (ppm)	La (ppm)	Ce (ppm)	Nd (ppm)	Sm (ppm)	Eu (ppm)	Gd (ppm)	Tb (ppm)	Dy (ppm)	Ho (ppm)	Er (ppm)	Yb (ppm)	Lu (ppm)	Hf (ppm)	Eu (star)	Ce (star)	La (ch)	Ce (ch)	Nd (ch)	Sm (ch)	Eu (ch)	Gd (ch)	Tb (ch)	Dy (chn)	Er (ch)
13ZA72A-14.1	0.192998	2.26057	193.086	99.3771	252.304	2.24837	251.414	2.4678	307.569	57.6173	18.1935	25.005	0.887756	0.0528231	2.45296	25.0142	0.888511	0.0525302	2.52979	0.28955	2.68129	0.0399773	0.888511	0.331375	484.116	0.160207	24.8884	0.611731	1.37592	0.669645	11.1067	3.65446	39.8078	17.7893	85.5028	191.116	39.6139	8657.72	0.522161	42.6823	0.67598	40.601	1.33858	9.29674	11.8942	55.8127	101.232	161.82	534.392
13ZA72A-21.1	0.332525	2.11451	206.759	202.84	253.739	2.27455	253.324	2.79397	321.048	66.614	21.2291	24.8261	0.892553	0.053973	2.45398	24.8613	0.898151	0.0528424	2.93185	0.293063	3.06634	0.0402232	0.898151	0.292907	426.764	0.0628127	35.794	0.498765	1.48962	0.723526	10.5403	3.69129	41.1503	15.6959	72.9004	155.039	32.1046	9995.19	0.556595	108.57	0.265032	58.3915	1.09139	10.065	12.8513	52.9665	102.252	167.278	455.627
13ZA72A-8.1	0.0564299	0.390802	517.225	478.078	256.35	1.95684	256.418	2.32482	271.94	34.1118	5.80666	24.6364	0.767279	0.0518195	1.47196	24.6395	0.767385	0.0517175	1.4882	0.289405	1.6744	0.0405852	0.767385	0.458304	885.887	0.328534	67.254	1.6144	3.12965	1.03426	22.9139	7.6039	84.7564	33.3532	151.64	288.275	55.2756	9976.44	0.372291	49.5786	1.38622	109.713	3.53261	21.1463	18.3706	115.145	210.634	344.538	947.752
13ZA72A-6.1	-0.185641	-1.72481	337.619	231.366	256.899	2.69091	256.218	3.02417	157.403	51.6354	-64.0405	24.6422	1.05397	0.0498922	1.9564	24.6628	1.05562	0.049222	2.2062	0.275182	2.44574	0.040547	1.05562	0.431617	622.381	0.0156894	49.6968	0.948421	2.11564	0.903937	15.1909	4.87472	55.5916	22.5218	106.215	224.766	44.1634	9661.12	0.486043	218.724	0.0662001	81.0714	2.07532	14.2949	16.0557	76.3362	135.034	225.982	663.846
13ZA72A-17.1	0.315773	4.08795	317.539	150.469	257.906	2.11922	257.788	2.29869	291.366	60.189	11.6315	24.4212	0.821973	0.0539325	1.93908	24.4754	0.829441	0.0521584	2.63505	0.29383	2.76251	0.0408573	0.829441	0.300249	487.951	0.0109185	20.2011	0.534511	1.42785	0.357616	11.819	3.81887	43.7648	18.3455	84.2238	164.229	31.5286	9897.29	0.26536	141.967	0.0460694	32.9545	1.16961	9.64762	6.35198	59.3919	105.786	177.906	526.399
13ZA72A-12.1	0.197938	2.65461	505.852	221.467	263.891	2.0693	262.643	2.19431	283.875	65.1256	7.13267	23.8844	0.775981	0.0531229	2.56923	23.9183	0.779218	0.0519877	2.84735	0.29969	2.95204	0.041809	0.779218	0.263959	1335.71	0.0444285	32.3113	1.18599	3.35028	0.756316	29.0032	10.6148	117.941	51.0339	234.926	436.068	80.3492	10799.4	0.233878	75.571	0.187462	52.7102	2.59517	22.637	13.4337	145.745	294.04	479.433	1468.29
13ZA72A-27.1	-0.162335	-1.32209	328.015	242.842	265.26	2.21505	262.665	2.55336	171.399	54.7972	-55.5014	23.8443	0.836284	0.0502657	2.05667	23.8665	0.838874	0.0495177	2.34732	0.28607	2.49272	0.0418997	0.838874	0.33653	1953.91	0.100873	14.3372	4.6693	9.72587	4.12671	72.7725	21.9755	222.037	79.8681	334.137	529.746	94.2668	7605.42	0.47283	11.2156	0.425625	23.3885	10.2173	65.7154	73.2985	365.691	608.74	902.59	2088.36
13ZA72A-23.1	-0.0368863	-0.376621	269.682	158.836	267.893	2.28508	266.012	2.53919	273.109	52.6021	1.93531	23.5755	0.85318	0.0513305	2.17049	23.5634	0.854735	0.0517438	2.29536	0.302777	2.44934	0.0424388	0.854735	0.348966	574.917	0.11882	28.3325	0.557171	1.35055	0.358181	12.6696	4.4313	48.0427	21.8051	99.7939	197.549	37.5413	10579.8	0.263946	59.1178	0.50135	46.2195	1.21919	9.12537	6.36201	63.6661	122.751	195.296	623.712
13ZA72A-9.1	0.137624	2.4018	205.766	69.7739	269.685	2.41607	268.797	2.70758	375.443	77.8372	28.5411	23.3748	0.893505	0.0527701	2.44951	23.3351	0.909479	0.054129	3.45898	0.319831	3.57655	0.0428538	0.909479	0.254289	1087.07	0.0117074	6.98686	0.944068	2.78473	0.7086	24.3491	8.80406	97.47	42.6505	192.086	353.249	66.4926	8616.12	0.262311	35.6798	0.0493983	11.3978	2.06579	18.8157	12.5861	122.357	243.88	396.22	1200.54
13ZA72A-24.1	-0.0172319	-0.207155	270.321	146.216	269.986	2.41912	270.247	2.64781	253.88	51.2369	-6.42988	23.3844	0.89729	0.0515352	2.17517	23.3909	0.897721	0.0513122	2.22805	0.302465	2.4021	0.0427517	0.897721	0.373723	533.262	0.00733235	30.0102	0.443169	1.35469	0.437193	11.405	4.19707	48.776	20.064	92.8686	190.631	36.1769	10988.9	0.339044	282.64	0.0309382	48.9563	0.969734	9.15331	7.76542	57.3113	116.262	198.277	580.429
13ZA72A-10.1	-0.157543	-1.54995	342.191	217.292	270.226	2.77742	269.008	3.0882	165.291	51.7597	-64.3593	23.3959	1.03542	0.0504155	1.81973	23.4258	1.03805	0.0493883	2.21472	0.290691	2.44592	0.042688	1.03805	0.424399	423.208	0.462215	42.1159	1.71156	1.76191	0.898999	12.4074	3.53537	36.3371	15.0489	69.4531	154.832	32.7698	9106.6	0.586104	25.4214	1.95027	68.7046	3.7452	11.9048	15.968	62.3489	97.9327	147.712	434.082
13ZA72A-5.1	-0.00588072	-0.0490667	1022.95	777.659	270.529	3.46806	270.079	4.02921	228.161	31.0242	-18.8227	23.3338	1.29732	0.0516385	1.11172	23.3598	1.29812	0.0507429	1.34283	0.299507	1.8677	0.0428085	1.29812	0.695037	2704.9	0.479967	40.2691	4.57693	8.89891	2.17928	86.755	25.8017	242.115	106.922	445.048	684.621	119.167	8380.84	0.239082	14.5865	2.02518	65.6919	10.0152	60.1278	38.7084	435.955	714.728	984.209	2781.55
13ZA72A-19.1	-0.129107	-1.12022	559.056	407.956	272.076	2.08076	271.249	2.5472	247.471	40.4879	-10.0783	23.2269	0.769385	0.0506851	1.49751	23.2129	0.771747	0.0511695	1.75859	0.303937	1.92048	0.0430795	0.771747	0.401852	1359.52	0.0217111	36.4872	1.46834	4.8604	0.912381	36.8687	12.6521	154.853	53.4106	235.928	422.65	73.9027	10617.9	0.207759	109.713	0.0916082	59.5223	3.21299	32.8406	16.2057	185.27	350.472	629.484	1474.55
13ZA72A-4.1	0.0766483	1.82035	914.516	251.324	272.69	1.99	273.086	2.06613	297.099	25.6547	8.32711	23.1259	0.736102	0.0523491	1.11716	23.1276	0.73614	0.0522895	1.12431	0.311735	1.34386	0.0432384	0.73614	0.547779	906.032	1.19757	31.0635	4.51647	4.63469	1.68221	18.1762	7.08058	79.2609	31.7602	161.805	398.657	83.2175	10256.5	0.558685	7.17087	5.05304	50.6745	9.88286	31.3155	29.8794	91.3377	196.138	322.199	1011.28
13ZA72A-16.1	0.68744	7.32651	550.706	335.647	272.792	2.67914	274.957	2.97524	210.987	72.142	-29.6968	22.9757	0.99079	0.0572499	1.34616	23.1743	1.00518	0.0503677	3.11279	0.299673	3.27106	0.0431513	1.00518	0.307295	934.616	4.42238	56.0009	11.4068	9.77036	3.03504	29.2367	9.71687	90.9175	36.2095	158.42	313.494	58.6472	8450.78	0.547386	4.23308	18.6598	91.3554	24.9602	66.0159	53.9083	146.918	269.165	369.583	990.126
13ZA72A-30.1	-0.124694	-1.76973	677.651	297.955	273.571	3.12086	272.664	3.33123	249.571	38.8811	-9.74853	23.0963	1.15278	0.0507542	1.44259	23.083	1.15421	0.0512162	1.68944	0.305926	2.04607	0.0433219	1.15421	0.564111	615.758	0.00260128	21.3692	0.360345	1.36907	0.235958	13.2058	4.41365	56.7539	22.6882	109.1	226.848	42.8914	10902.1	0.169157	374.721	0.0109758	34.86	0.7885	9.25045	4.19109	66.3608	122.262	230.707	681.878
13ZA72A-18.1	0.0803232	0.960105	403.297	208.063	278.394	2.28006	277.615	2.4913	267.47	44.9694	-4.14107	22.6411	0.823255	0.0525078	1.6569	22.6663	0.825752	0.0516167	1.96031	0.313987	2.12713	0.0441184	0.825752	0.388201	1523.91	0.0136548	23.3963	1.22849	3.32146	0.990142	29.0047	10.931	142.187	58.7796	278.288	525.878	98.4954	8130.16	0.307502	96.9819	0.0576151	38.1669	2.68817	22.4423	17.5869	145.752	302.799	577.997	1739.3
13ZA72A-15.1	0.149715	2.18837	646.195	281.186	278.83	2.87073	279.035	3.13103	337.582	658.324	17.6432	22.5893	1.04031	0.0530744	1.3028	22.5849	2.19197	0.0532289	29.0598	0.324961	29.1424	0.0442773	2.19197	0.075216	2492.45	0.0257393	20.7138	2.2116	7.34774	0.800288	68.0626	23.4467	262.588	103.753	428.865	664.281	112.57	9890.18	0.109085	46.6101	0.108604	33.7909	4.83939	49.6469	14.2147	342.023	649.494	1067.43	2680.4
13ZA72A-2.1	-0.12923	-3.6395	999.439	232.241	280.476	2.79747	280.307	2.89057	247.02	28.9913	-13.7342	22.5165	1.00879	0.0508737	1.13525	22.5085	1.00942	0.0511595	1.25913	0.313387	1.61379	0.0444276	1.00942	0.625493	1682.25	0.0107326	20.891	0.424774	1.75155	0.290421	22.2128	10.296	131.295	61.9744	308.72	651.151	122.438	11938.2	0.141927	166.112	0.0452851	34.0799	0.929484	11.8348	5.15845	111.622	285.207	533.719	1929.5
13ZA72A-28.1	0.0781284	1.08235	289.25	128.329	282.482	2.40042	281.76	2.5789	326.921	1697.23	13.783	22.3069	0.85052	0.052583	2.11198	22.2958	5.01402	0.0529793	74.7775	0.32763	74.9454	0.0448514	5.01402	0.0669022	991.833	0.0122256	16.7919	0.87934	2.66773	0.459518	24.2989	8.30248	94.4559	39.7465	175.592	303.958	56.2243	9242.73	0.173975	86.9475	0.0515849	27.3929	1.92416	18.0252	8.16196	122.105	229.986	383.967	1097.45
13ZA72A-29.1	0.0197574	0.29794	211.916	88.313	333.978	5.24875	333.422	5.63648	330.721	51.7938	-1.00087	18.8025	1.59052	0.0533034	2.22948	18.808	1.59079	0.0530681	2.2835	0.389037	2.78298	0.0531688	1.59079	0.571612	797.548	0.013458	5.78494	0.696819	2.06345	0.145359	16.8236	6.51667	73.7455	32.5157	157.582	311.009	58.3556	9712.28	0.0752028	32.0717	0.0567846	9.4371	1.52477	13.9423	2.58187	84.5408	180.517	299.779	984.89
13ZA72A-25.1	0.00602302	0.0445956	563.543	469.227	368.743	3.40289	366.08	3.92688	367.686	27.7886	-0.292625	16.9859	0.935789	0.0540168	1.22378	16.9875	0.935834	0.0539429	1.2332	0.437832	1.54809	0.058867	0.935834	0.60451	2047.17	0.0230126	36.426	1.75119	4.5771	1.61345	44.7072	16.9287	201.668	79.0334	349.561	613.205	111.42	7257.38	0.343812	97.4168	0.0970997	59.4225	3.83192	30.9264	28.6581	224.659	468.939	819.788	2184.76
13ZA72A-20.1	1.44452	66.3362	411.105	49.7456	439.092	4.66788	443.896	4.7473	500.343	74.0263	12.494	13.982	1.08047	0.0673872	1.20677	14.1595	1.10171	0.0572533	3.36182	0.55751	3.53774	0.0706238	1.10171	0.311416	371.37	6.90624	45.1448	11.8307	6.66628	2.03762	15.8212	3.85164	36.0493	13.3103	67.4296	212.343	47.679	10194.5	0.604799	2.68135	29.1402	73.6456	25.8877	45.0424	36.1922	79.5036	106.694	146.542	421.435
13ZA72A-11.1	-0.12736	-2.57892	165.597	50.2391	466.972	4.35019	464.991	4.49026	441.36	1539.63	-5.9313	13.3277	0.941868	0.0553617	2.03825	13.3214	4.84416	0.0557476	69.2127	0.577003	69.382	0.0750674	4.84416	0.0698187	346.22	0.0071814	8.11155	0.173784	0.635348	0.315633	6.55786	2.2287	26.12	12.2551	64.2864	163.734	37.6184	10304.7	0.471351	123.272	0.0303013	13.2325	0.380272	4.29289	5.60627	32.9541	61.7368	106.179	401.79
13ZA72A-1.1	-0.106446	-3.94855	459.505	78.8257	515.594	6.19162	514.639	6.24083	479.094	28.2005	-7.80216	12.0223	1.22638	0.056786	1.26594	12.0235	1.22642	0.0567044	1.27603	0.650258	1.76984	0.0831702	1.22642	0.692953	1344.74	0.00235456	2.22554	0.247866	1.52256	0.0661636	21.6329	9.17626	112.947	51.8638	240.42	411.624	74.3735	11851.3	0.0351417	49.4588	0.00993484	3.63056	0.542375	10.2876	1.1752	108.708	254.19	459.134	1502.63
13ZA72A-22.1	0.0197125	0.66494	298.888	55.0359	527.638	4.46407	526.88	4.5124	498.117	35.4828	-6.07179	11.722	0.86114	0.0581295	1.36405	11.7355	0.863051	0.0571954	1.61079	0.67199	1.82743	0.0852119	0.863051	0.472275	1604.33	0.0488106	7.15854	0.349952	1.73159	0.262091	20.6727	9.52047	118.676	61.2646	295.028	575.53	105.321	9550.99	0.13353	29.4059	0.205952	11.6779	0.76576	11.6999	4.65526	103.883	263.725	482.423	1843.93
13ZA72A-7.1	2.3593	39.5355	630.274	300.935	708.583	5.25336	733.301	5.65209	988.222	40.2627	29.0866	8.40372	0.7538	0.0824409	1.20867	8.51181	0.76394	0.0721122	1.97901	1.16812	2.12134	0.117484	0.76394	0.360122	1360.31	52.0595	276.339	84.9897	51.6067	19.1058	113.793	25.5788	150.47	49.8181	181.362	306.954	57.9448	10008	0.75998	2.23039	219.66	450.798	185.973	348.694	339.356	571.824	708.553	611.665	1133.51
13ZA72A-3.1	0.414191	28.7873	158.488	12.5709	746.317	10.5778	747.398	10.465	874.429	36.4083	15.0948	8.11353	1.45674	0.0675837	1.50362	8.10721	1.45882	0.0682228	1.75826	1.16027	2.28466	0.123347	1.45882	0.638531	919.138	0.345127	4.61893	0.585337	1.60564	0.420293	13.8809	5.7816	72.6697	33.8239	156.541	336.117	65.7043	11202.8	0.271375	5.51723	1.45623	7.53497	1.28083	10.8489	7.46524	69.7531	160.155	295.405	978.381
13ZA72A-18.1…dup1	1.29681	26.6093	720.416	315.242	885.989	7.31475	910.603	7.67924	1008.37	38.9142	12.5417	6.69938	0.8528	0.0793792	0.542387	6.75288	0.867807	0.0728309	1.91861	1.48706	2.10574	0.148085	0.867807	0.412114	1501.9	91.8596	479.155	130.916	69.5655	14.5345	105.582	24.1477	204.262	57.918	241.265	423.12	75.926	10438.6	0.516962	2.34579	387.593	781.655	286.468	470.037	258.162	530.561	668.912	830.335	1507.91
13ZA72A-13.1	0.101776	3.67304	421.798	75.8015	918.233	8.73294	917.848	8.75099	953.526	16.3793	3.8312	6.52568	0.982801	0.0705336	0.748632	6.52283	0.983123	0.070896	0.800807	1.4986	1.268	0.153308	0.983123	0.775334	838.307	0.0185614	8.31602	0.361707	1.39259	0.110977	13.7181	5.57179	76.2822	33.5308	162.11	343.053	68.2209	15594.9	0.0773969	54.4883	0.0783181	13.5661	0.791482	9.40936	1.97117	68.9353	154.343	310.09	1013.19
13ZA72A-17.1…dup1	0.187881	57.2569	527.909	11.2366	1048.07	10.3314	1049.68	9.92411	1087.85	12.1187	3.79184	5.65366	1.02123	0.0758502	0.59796	5.65428	1.02126	0.0757596	0.604689	1.8474	1.18685	0.176857	1.02126	0.860477	243.209	0.0807655	1.4308	0.118416	0.120138	0.0436334	0.884436	0.756002	13.2577	7.7051	58.8724	226.816	55.743	8763.31	0.408033	7.85475	0.340783	2.3341	0.259117	0.811741	0.775015	4.4444	20.9419	53.8932	367.953
13ZA72A-26.1	-0.211307	-36.9892	340.56	11.5947	1101.72	8.72514	1098.74	8.32273	1056.36	15.6977	-4.46049	5.37679	0.819128	0.0745091	0.774408	5.37633	0.819172	0.0745811	0.77959	1.91269	1.13084	0.186001	0.819172	0.724391	623.286	0.00498133	0.526062	0.0616716	0.426387	0.0390113	7.73959	4.07178	53.4881	23.8916	108.942	187.828	31.3507	12967.9	0.0654604	16.1136	0.0210183	0.858176	0.134949	2.88099	0.692918	38.8924	112.792	217.431	680.891
Spot Name	7-corr %com 206	7-corr %com 208	ppm U	ppm Th	207corr 206Pb /238U Age	1s err	208corr 206Pb /238U Age	1s err	204corr 207Pb /206Pb Age	1s err	% Dis- cor- dant	Total 238 /206	% err	Total 207 /206	% err	4corr 238 /206*	% err	4corr 207* /206*	% err	4corr 207* /235	% err	4corr 206* /238	% err	err corr	Y (ppm)	La (ppm)	Ce (ppm)	Nd (ppm)	Sm (ppm)	Eu (ppm)	Gd (ppm)	Tb (ppm)	Dy (ppm)	Ho (ppm)	Er (ppm)	Yb (ppm)	Lu (ppm)	Hf (ppm)	Eu (star)	Ce (star)	La (ch)	Ce (ch)	Nd (ch)	Sm (ch)	Eu (ch)	Gd (ch)	Tb (ch)	Dy (chn)	Er (ch)
12ZA18-6.1	8.67051	57.0435	1164.53	2867.48	114.76	3.82901	173.233	6.71637	282.034	347.549	59.6539	50.8473	3.27062	0.117248	4.66941	55.4217	3.33508	0.0519459	15.1901	0.129233	15.5519	0.0180435	3.33508	0.214448	3269.73	246.157	802.273	476.833	353.297	94.6216	504.115	62.4925	329.062	131.94	457.771	716.337	127.098	7111.4	0.683446	1.2572	1038.64	1308.76	1043.4	2387.14	1680.67	2533.24	1731.09	1337.65	2861.07
12ZA18-2.1	3.29239	38.1657	809.099	518.806	237.658	3.56552	249.302	4.30654	460.674	118.161	48.9666	25.7511	1.50382	0.0773038	2.09148	26.4521	1.5362	0.0562345	5.32963	0.29312	5.54661	0.0378042	1.5362	0.276963	2425.35	98.11	477.729	147.673	65.7957	15.6693	137.066	30.0432	245.955	86.5666	379.117	672.656	119.344	11535.4	0.502962	2.13081	413.966	779.329	323.136	444.565	278.318	688.775	832.222	999.816	2369.48
12ZA18-11.1	7.45592	40.4	711.575	752.975	238.657	4.98131	251.642	6.57442	33.0563	224.925	-629.725	24.5374	2.10809	0.110653	0.897072	26.6558	2.17326	0.0467036	9.3899	0.24158	9.63811	0.0375153	2.17326	0.225487	1965.44	39.7503	774.813	62.7518	28.7864	7.84604	84.0367	19.6434	178.404	74.6065	303.867	546.169	100.795	8756.89	0.486263	8.32886	167.723	1263.97	137.312	194.502	139.361	422.295	544.138	725.217	1899.17
12ZA18-32.1	1.53803	20.5399	1232.97	512.71	254.557	1.84218	255.738	1.99359	258.166	108.223	1.41591	24.4455	0.729502	0.0636494	0.877822	24.8249	0.786452	0.051408	4.70976	0.285526	4.77497	0.0402822	0.786452	0.164703	2873.49	19.2587	65.7286	29.2496	15.8243	4.47419	59.3524	21.8491	270.995	109.809	487.395	898.824	159.399	12861.1	0.445022	1.4868	81.2605	107.224	64.0035	106.921	79.4705	298.253	605.237	1101.61	3046.22
12ZA18-16.1	0.0486475	0.166386	521.792	927.074	260.175	1.99262	254.891	3.14117	245.312	39.6473	-6.13797	24.2688	0.769819	0.0518428	1.49363	24.2906	0.771573	0.0511216	1.7214	0.290179	1.88641	0.0411681	0.771573	0.409016	1045.45	0.250591	78.8155	1.79948	4.54765	2.266	37.4489	10.9535	106.128	42.1811	171.888	278.916	48.9869	8724.75	0.529293	63.0126	1.05735	128.573	3.93758	30.7274	40.2487	188.186	303.42	431.416	1074.3
12ZA18-24.1	0.111606	0.594293	353.022	411.113	261.921	2.69497	260.242	3.33217	234.089	86.3433	-12.0466	24.0885	1.01945	0.0523866	3.32621	24.134	1.02383	0.0508733	3.74123	0.290644	3.87879	0.0414353	1.02383	0.263955	1808.88	0.21122	85.2825	2.55936	6.33106	3.39018	55.2272	17.5416	195.714	69.2041	302.043	515.429	91.5415	8189.25	0.552659	62.2727	0.891224	139.123	5.60036	42.7775	60.2164	277.524	485.916	795.587	1887.77
12ZA18-22.1	-0.271697	-2.19739	136.364	104.094	264.633	2.56514	262.557	3.06137	34.5262	113.248	-675.662	23.9281	0.962074	0.049375	3.21758	24.0068	0.980623	0.0467323	4.72904	0.268401	4.82965	0.0416549	0.980623	0.203042	708.87	0.163504	31.7161	0.696457	1.58652	0.876082	16.3722	5.57213	70.9943	27.7981	126.333	227.561	42.4124	9543.34	0.523983	50.4591	0.689892	51.7391	1.52398	10.7198	15.561	82.2724	154.353	288.595	789.578
12ZA18-31.1	0.405763	12.5194	669.239	132.272	267.19	1.98304	267.817	2.03392	248.276	50.8514	-7.72021	23.5343	0.747169	0.0548636	1.25202	23.6427	0.755468	0.0511874	2.20905	0.298516	2.33466	0.0422964	0.755468	0.323589	507.573	0.318699	17.2184	0.61292	0.976068	0.400994	6.96121	2.84544	39.5379	17.9099	90.62	233.589	48.5781	12013.9	0.468926	20.9157	1.34472	28.0887	1.34118	6.59505	7.12245	34.981	78.8211	160.723	566.375
12ZA18-14.1	3.81505	35.5958	411	228.636	269.189	19.6295	273.479	21.8356	-194.804	1321	241.645	22.5564	7.1984	0.0822457	15.6885	23.7173	7.5291	0.0425527	52.7762	0.247379	53.3106	0.0421633	7.5291	0.141231	1455.78	8.09075	65.7368	12.1617	8.74538	3.09617	49.5528	13.6891	133.98	59.4064	249.919	443.911	81.7765	8463.08	0.453368	3.55786	34.1382	107.238	26.612	59.0904	54.9942	249.009	379.198	544.634	1561.99
12ZA18-20.1	-0.251444	-1.87291	146.616	122.104	270.785	2.75638	268.742	3.26837	48.9583	108.219	-459.468	23.3685	1.01545	0.0496751	2.95191	23.4459	1.03326	0.0470152	4.53137	0.276486	4.64768	0.0426515	1.03326	0.222318	829.312	0.112018	25.4782	1.10914	2.57762	1.56176	22.7882	7.14888	78.9829	32.2763	144.605	267.291	52.1966	7509.53	0.621154	38.8063	0.472651	41.5631	2.42701	17.4163	27.74	114.513	198.03	321.069	903.784
12ZA18-12.1	0.239146	1.37444	210.104	211.002	271.567	2.42863	266.655	3.08931	238.498	83.7193	-14.0549	23.1858	0.892215	0.0536268	2.38618	23.2628	0.90753	0.0509706	3.63043	0.302106	3.74215	0.0429872	0.90753	0.242516	1335.15	5.64562	38.697	15.3026	20.0736	8.54286	96.4581	20.9239	152.528	53.6286	188.895	277.89	47.4204	8777.42	0.591794	2.23517	23.8212	63.1273	33.4848	135.632	151.738	484.714	579.609	620.034	1180.6
12ZA18-18.1	0.0142885	0.159139	449.615	243.938	272.065	2.64886	270.563	2.8939	271.504	37.9965	-0.209432	23.1946	0.981174	0.0518349	1.63489	23.1983	0.981302	0.0517076	1.65755	0.307326	1.92624	0.0431066	0.981302	0.509438	861.828	0.139175	38.5618	0.970104	1.99015	0.640936	16.929	6.15764	79.4458	32.4146	153.611	318.242	61.3681	11123.9	0.336593	56.343	0.587235	62.9066	2.12277	13.4469	11.3843	85.0704	170.572	322.95	960.07
12ZA18-30.1	-0.346088	-1.7492	260.836	339.46	274.286	3.43234	274.958	4.40825	226.005	74.0661	-21.6583	23.0857	1.26117	0.0489946	2.23929	23.0369	1.26999	0.0506955	3.20456	0.303422	3.44704	0.0434086	1.26999	0.36843	1833.87	0.0542802	60.9837	4.19126	9.37916	4.815	62.4679	18.8682	214.247	73.4463	302.236	512.181	92.8802	7781.9	0.606366	68.6424	0.22903	99.484	9.17126	63.3727	85.5239	313.909	522.666	870.921	1888.98
12ZA18-29.1	-0.0790004	-0.412613	211.856	251.877	275.512	3.81497	273.196	4.80077	300.326	73.3904	8.37573	22.9196	1.39592	0.0511644	2.32106	22.8854	1.40389	0.0523636	3.21817	0.31548	3.51105	0.043696	1.40389	0.399847	1364.26	0.0753571	50.4432	3.9973	8.20296	3.95681	50.115	14.611	152.938	55.213	224.906	384.353	69.5247	8035.16	0.594875	49.3433	0.317962	82.289	8.74684	55.4254	70.2809	251.834	404.737	621.7	1405.67
12ZA18-23.1	-0.0335498	-6.76825	490.893	16.5988	278.277	2.14059	278.269	2.11957	261.517	35.0739	-6.49769	22.6767	0.773849	0.0515916	1.5093	22.6798	0.773967	0.051483	1.5273	0.312988	1.71221	0.0440922	0.773967	0.452028	211.207	0.0139853	3.36245	0.55626	2.07518	0.675713	19.2081	0.0116298	0.0834554	8.05691	23.841	26.9157	4.80856	11739.7	0.326243	20.467	0.0590098	5.48524	1.2172	14.0215	12.002	96.5233	0.322155	0.33925	149.006
12ZA18-28.1	1.52702	25.7327	553.166	190.392	286.007	2.21175	288.598	2.35198	169.563	113.833	-69.6715	21.7064	0.776269	0.0642922	1.37895	22.1133	0.824464	0.0494787	4.87456	0.308508	4.94379	0.0452217	0.824464	0.166768	854.474	4.73663	143.539	8.04885	5.11728	1.50751	20.5013	6.37806	79.0886	32.8144	145.287	319.951	65.2746	10433.1	0.44864	12.4807	19.9858	234.158	17.6124	34.5762	26.7763	103.022	176.678	321.498	908.041
12ZA18-13.1	27.1601	72.69	197.343	200.285	289.997	5.6656	295.936	7.66581	741.646	1231.51	61.694	15.8303	1.06907	0.270166	3.61192	21.4108	4.53625	0.0640283	58.2251	0.412326	58.4015	0.0467054	4.53625	0.0776735	938.141	32.1193	60.3772	7.29825	5.74472	2.56502	32.7975	8.85848	84.8578	36.6677	157.761	291.893	56.4124	8418.81	0.569618	2.11715	135.524	98.4946	15.9699	38.8157	45.5598	164.812	245.387	344.951	986.004
12ZA18-10.1	1.11472	14.6116	603.46	304.778	325.572	4.23946	329.831	4.63698	660.43	25.6714	51.4587	19.0893	1.32001	0.061915	1.14712	19.0961	1.32025	0.061632	1.19769	0.445003	1.78256	0.0523668	1.32025	0.740648	845.225	0.141422	41.6077	0.724877	1.93475	0.83283	19.0566	6.11491	69.222	31.9401	147.012	299.87	56.8075	10409.5	0.41809	69.7678	0.596717	67.8755	1.58616	13.0727	14.7927	95.762	169.388	281.39	918.822
12ZA18-17.1	1.29074	15.6958	709.363	432.622	358.604	3.0748	367.816	3.41731	425.06	57.2244	15.9042	17.2554	0.868314	0.064129	1.04941	17.446	0.882022	0.0553411	2.56518	0.437373	2.71259	0.0573196	0.882022	0.325159	1792.39	35.4022	143.184	48.3104	28.558	7.4263	71.0484	20.6868	214.778	68.093	292.016	576.846	110.541	10949.4	0.502551	1.85879	149.376	233.579	105.712	192.96	131.906	357.027	573.042	873.082	1825.1
12ZA18-26.1	0.128531	1.44128	641.469	690.895	366.359	8.3471	399.571	9.94986	-97.9515	151.272	483.192	17.0786	2.31497	0.0549475	1.99801	17.3056	2.33496	0.0442478	6.15895	0.35254	6.58671	0.0577849	2.33496	0.354496	963.721	8.87032	81.7974	13.6987	8.68178	3.06596	30.8559	6.82313	77.4322	42.0518	135.904	257.575	49.4531	6462.87	0.571008	3.98384	37.4275	133.438	29.9752	58.6607	54.4576	155.055	189.006	314.765	849.399
12ZA18-7.1	0.227682	7.45054	421.751	78.0777	469.327	3.67205	469.308	3.72908	537.261	26.7403	12.9195	13.2114	0.7949	0.0583014	1.21315	13.2126	0.794957	0.0582243	1.22206	0.607599	1.45787	0.0756852	0.794957	0.545287	3302.67	0.45672	4.79346	1.75007	4.50184	0.207981	53.816	22.866	272.681	121.351	566.446	960.927	167.36	11308.2	0.0407307	2.87851	1.92709	7.81967	3.82948	30.4178	3.69416	270.432	633.406	1108.46	3540.29
12ZA18-21.1	0.194102	1.01499	258.537	319.937	471.269	3.94141	470.997	8.54787	467.381	43.4192	-0.850261	13.1593	0.848149	0.0580787	1.49221	13.1865	0.852338	0.056405	1.96068	0.589777	2.13793	0.0758349	0.852338	0.398674	2038.5	0.752969	23.6153	3.97622	8.26055	0.758991	62.119	20.2955	218.655	84.7337	349.585	571.032	100.266	8405.23	0.102134	7.32726	3.17708	38.5242	8.7007	55.8145	13.4812	312.156	562.201	888.841	2184.9
12ZA18-15.1	0.0860876	0.733478	344.181	252.108	474.156	3.78588	471.762	4.25549	507.492	29.4045	6.71393	13.0904	0.810967	0.0572764	1.31048	13.0878	0.811216	0.0574395	1.337	0.605127	1.56386	0.0764072	0.811216	0.518728	3371.69	0.0587696	5.33907	4.09048	9.96154	0.591719	89.8028	30.6116	365.287	134.354	560.138	881.292	150.864	9817.97	0.0603054	5.8462	0.247973	8.70974	8.95072	67.3077	10.5101	451.271	847.967	1484.91	3500.86
12ZA18-27.1	0.00893116	0.0863244	363.37	233.95	475.174	3.7185	472.643	4.10689	466.4	28.3946	-1.92316	13.0714	0.795471	0.0566764	1.22001	13.0762	0.79589	0.05638	1.282	0.594491	1.50896	0.0764749	0.79589	0.527443	2234.61	0.0972568	45.5154	1.17868	3.86569	1.25873	41.3048	16.4328	229.629	88.6842	404.013	755.916	137.501	9666.91	0.303647	72.1727	0.410366	74.2503	2.57916	26.1195	22.3576	207.562	455.202	933.45	2525.08
12ZA18-25.1	-0.0538815	-1.3019	440.452	112.396	477.252	3.75616	475.858	3.84608	443.408	26.6183	-7.80507	13.0205	0.801017	0.0562199	1.10592	13.0273	0.801577	0.0557989	1.19702	0.590572	1.44062	0.076762	0.801577	0.55641	1323.68	0.00813042	9.88178	0.50882	1.94127	0.382179	22.6308	9.62307	131.675	51.8726	247.408	468.323	84.8641	10646	0.175761	82.4838	0.0343056	16.1204	1.11339	13.1167	6.78826	113.723	266.567	535.264	1546.3
12ZA18-36.1	1.97934	23.1331	550.767	246.447	492.186	5.76223	492.78	6.20861	567.129	75.4311	13.513	12.3544	1.18852	0.0731179	1.6068	12.5731	1.20604	0.0590266	3.46476	0.647303	3.66867	0.0795351	1.20604	0.32874	1084.8	6.23143	150.58	6.19427	4.28818	0.986453	26.7416	9.07679	107.343	41.694	185.87	359.482	68.1078	9723.9	0.280799	13.0121	26.293	245.644	13.5542	28.9742	17.5214	134.38	251.435	436.354	1161.69
12ZA18-19.1	0.106627	1.0179	464.761	266.786	527.535	4.04739	518.387	4.40447	570.27	25.0085	7.67428	11.7142	0.782182	0.0588341	1.05429	11.7102	0.782927	0.0591118	1.14932	0.696004	1.39065	0.0853957	0.782927	0.562993	415.076	0.0198201	26.453	0.304346	0.854115	0.480732	7.18465	2.65152	36.2029	14.6842	78.1348	185.18	38.4144	11195.8	0.591549	182.856	0.0836293	43.1534	0.665965	5.77105	8.53876	36.1038	73.4492	147.166	488.343
12ZA18-35.1	-0.104104	-0.752591	118.326	105.02	545.809	5.40481	543.094	6.26904	457.358	57.2573	-19.8333	11.3296	1.00467	0.0576042	2.04556	11.3498	1.00993	0.0561505	2.58109	0.68213	2.77164	0.0881074	1.00993	0.364378	162.157	0.0272765	2.87688	1.74461	4.80335	0.138295	20.4182	3.12515	16.5237	6.15064	17.9587	20.3448	2.87599	10807.2	0.0425671	7.08029	0.115091	4.69311	3.81752	32.455	2.45639	102.604	86.5694	67.1694	112.242
12ZA18-4.1	0.146597	1.64745	270.254	145.346	557.421	18.3256	553.878	19.7445	289.909	93.897	-94.7643	11.0557	3.36884	0.0599593	1.70779	11.1621	3.37657	0.0521251	4.1097	0.643877	5.31892	0.0895889	3.37657	0.634822	1243.19	2.5505	27.4683	2.73585	2.8208	0.720676	24.227	8.82593	108.56	50.2533	215.628	412.234	75.2891	8617.36	0.265737	5.58271	10.7616	44.8096	5.98654	19.0595	12.8006	121.744	244.486	441.299	1347.67
12ZA18-37.1	1.44357	10.7187	278.467	252.003	559.468	7.57017	568.843	10.9779	655.28	94.6363	14.9857	10.8704	1.36311	0.0705896	2.95545	10.9936	1.37915	0.0614841	4.41146	0.771125	4.62202	0.0909621	1.37915	0.298388	987.82	13.5526	91.101	24.3128	12.3588	3.1017	32.6149	8.66188	87.0504	34.7431	160.558	357.785	73.8016	8136.05	0.470926	2.69443	57.184	148.615	53.2008	83.5052	55.0923	163.894	239.941	353.863	1003.49
12ZA18-8.1	0.737513	18.8773	462.355	99.7181	643.744	7.19899	644.058	7.3282	746.879	29.2536	14.1903	9.45203	1.14762	0.0671974	0.907261	9.48702	1.15033	0.064187	1.38427	0.932865	1.79985	0.105407	1.15033	0.639126	534.967	1.5001	45.3137	2.12867	2.27378	0.399427	16.2081	4.90622	48.8653	20.4511	89.4911	166.371	31.4158	9308.85	0.20056	13.6141	6.32952	73.9211	4.65791	15.3634	7.09462	81.4479	135.906	198.639	559.319
12ZA18-5.1	-0.229181	-10.27	349.873	47.5721	713.532	9.88449	710.604	9.75857	569.305	56.3696	-26.1389	8.56331	1.4174	0.0612995	2.29522	8.5863	1.41922	0.0590856	2.59017	0.948805	2.9535	0.116465	1.41922	0.480521	592.462	0.679128	4.16135	1.07724	2.0135	0.15369	15.5782	5.17155	58.1482	23.7155	102.741	184.714	33.7254	8181.36	0.083649	2.612	2.86552	6.78849	2.35721	13.6047	2.72984	78.2823	143.256	236.375	642.128
12ZA18-34.1	0.723003	15.7624	175.432	38.0059	770.424	14.0086	765.359	14.2933	958.301	538.381	20.199	7.82036	1.87357	0.0708747	1.26888	7.81858	2.95291	0.0710618	26.3415	1.25317	26.5065	0.127901	2.95291	0.111403	937.999	0.0302682	4.09854	1.89724	4.51203	1.37428	32.3433	9.82978	109.038	39.1424	163.101	282.509	51.8675	8135.88	0.346775	9.1822	0.127714	6.68603	4.1515	30.4867	24.41	162.529	272.293	443.244	1019.38
12ZA18-33.1	3.34762	39.341	585.949	286.514	777.125	6.08946	792.17	7.10415	943.993	126.059	18.2188	7.54396	0.7517	0.0927543	2.57126	7.75371	0.869527	0.0705666	6.15411	1.25485	6.21523	0.12897	0.869527	0.139902	3655.25	30.6545	524.939	29.3939	18.9182	2.52503	98.9287	32.7776	370.38	148.087	602.05	967.445	171.243	9222.62	0.177916	9.38868	129.344	856.345	64.3194	127.825	44.8496	497.129	907.968	1505.61	3762.81
12ZA18-9.1	0.701455	13.5633	691.203	614.154	998.342	14.2473	1086.02	15.5842	1095.41	22.9583	9.17473	5.92814	1.47676	0.0783372	0.98187	5.9445	1.47757	0.0760458	1.14684	1.76385	1.87042	0.168223	1.47757	0.789968	1228.07	4.37926	27.4385	13.4781	19.3995	5.52812	59.881	15.4121	136.149	50.0497	210.848	375.153	66.7338	9414.3	0.49441	1.91742	18.4779	44.7611	29.4926	131.078	98.1905	300.909	426.929	553.45	1317.8
12ZA18-1.1	-0.135232	-3.04426	347.206	100.571	1078.5	8.48085	1074.3	8.42877	1025.09	17.9773	-5.41227	5.49854	0.8131	0.0742714	0.782064	5.50402	0.813861	0.0734344	0.888598	1.83959	1.20498	0.181686	0.813861	0.675414	450.007	0.774804	18.3818	2.15048	1.99717	0.298112	10.4614	3.58782	45.794	17.6404	80.8038	148.415	26.5017	10879	0.198804	7.64534	3.26922	29.9867	4.70564	13.4944	5.29506	52.57	99.3856	186.155	505.024
12ZA18-3.1	-0.0309467	-0.188624	190.647	250.967	2607.48	25.6099	2584.28	22.8836	2605.19	6.54757	-0.080069	2.00651	0.888813	0.174951	0.392597	2.00643	0.888821	0.174986	0.393005	12.0248	0.971831	0.498397	0.888821	0.914584	660.425	0.0481607	87.3818	1.94879	4.1291	1.4511	26.2759	7.59715	72.9073	25.6524	106.323	174.655	31.6505	9048.02	0.424659	153.131	0.20321	142.548	4.26432	27.8993	25.7745	132.04	210.447	296.371	664.521
																																							#DIV/0!	#DIV/0!
Spot Name	7-corr %com 206	7-corr %com 208	ppm U	ppm Th	207corr 206Pb /238U Age	1s err	208corr 206Pb /238U Age	1s err	204corr 207Pb /206Pb Age	1s err	% Dis- cor- dant	Total 238 /206	% err	Total 207 /206	% err	4corr 238 /206*	% err	4corr 207* /206*	% err	4corr 207* /235	% err	4corr 206* /238	% err	err corr	Y (ppm)	La (ppm)	Ce (ppm)	Nd (ppm)	Sm (ppm)	Eu (ppm)	Gd (ppm)	Tb (ppm)	Dy (ppm)	Ho (ppm)	Er (ppm)	Yb (ppm)	Lu (ppm)	Hf (ppm)	Eu (star)	Ce (star)	La (ch)	Ce (ch)	Nd (ch)	Sm (ch)	Eu (ch)	Gd (ch)	Tb (ch)	Dy (chn)	Er (ch)
13ZA76A-27.1	0.389975	3.67818	234.424	160.859	253.384	2.1971	254.638	2.50675	345.838	60.6503	27.0677	24.8473	0.864215	0.0544253	2.28357	24.8785	0.868763	0.0534234	2.68116	0.29608	2.8184	0.0401954	0.868763	0.308247	870.887	0.0322945	14.6121	1.50455	3.45721	1.26993	25.1465	7.33704	83.3399	32.0593	146.747	274.436	52.629	7265.14	0.415172	35.5891	0.136264	23.837	3.29224	23.3595	22.5566	126.365	203.242	338.78	917.169
13ZA76A-30.1	0.423593	5.11661	265.464	133.748	255.774	2.12882	255.689	2.53808	393.899	42.9229	35.5046	24.6022	0.833053	0.0547484	1.88086	24.6076	0.833335	0.0545755	1.91364	0.305795	2.08721	0.0406379	0.833335	0.399257	530.375	0.0306937	16.6027	0.59654	1.41785	0.466122	11.6513	3.98424	43.9037	20.0507	96.5755	197.592	38.9107	8633.83	0.34958	65.8727	0.129509	27.0843	1.30534	9.58006	8.27926	58.5492	110.367	178.47	603.597
13ZA76A-31.1	-0.194084	-1.37389	251.684	216.679	255.819	2.88856	253.314	3.67166	172.954	56.0775	-48.5363	24.7504	1.13441	0.0498005	2.33681	24.7581	1.13484	0.0495507	2.40286	0.275952	2.65736	0.0403909	1.13484	0.427055	1231.54	0.134424	43.6504	2.45172	5.33796	2.11644	38.9082	11.5923	119.123	49.4068	210.003	360.667	65.1737	7464.15	0.447658	40.8212	0.567191	71.2078	5.36482	36.0673	37.5921	195.518	321.117	484.24	1312.52
13ZA76A-34.1	-0.0239865	-0.305878	229.738	111.134	259.598	3.3896	258.712	3.53696	238.965	136.527	-8.74713	24.3415	1.26844	0.0512478	5.86505	24.3496	1.26888	0.0509809	5.92091	0.28868	6.05535	0.0410684	1.26888	0.209547	718.267	0.00837242	19.6652	0.630216	1.78591	0.36232	16.503	5.78391	63.6094	27.3713	125.761	235.898	43.4542	9472.75	0.203436	145.345	0.0353267	32.0802	1.37903	12.067	6.43552	82.9299	160.219	258.575	786.004
13ZA76A-11.1	3.30001	20.5542	309.845	258.574	259.826	2.94177	259.299	3.58588	-227.503	328.892	217.228	23.5115	1.13308	0.0778914	1.76972	24.6003	1.30751	0.0420022	13.0552	0.235414	13.1205	0.0406498	1.30751	0.0996533	917.551	6.21325	83.6693	8.30445	5.99034	1.8121	28.4483	8.99074	103.421	36.6218	156.447	275.063	48.8017	10390.5	0.423135	6.2535	26.2162	136.491	18.1717	40.4753	32.1866	142.956	249.051	420.412	977.796
13ZA76A-37.1	0.467187	5.7476	414.902	194.395	259.98	2.07924	258.901	2.25894	178.543	79.6196	-46.2155	24.1856	0.80236	0.0551927	1.62437	24.3531	0.822041	0.0496695	3.41511	0.281214	3.51265	0.0410625	0.822041	0.234023	782.548	0.321599	38.9864	1.60067	2.00444	0.964395	16.2935	5.87289	68.2837	29.0516	136.681	286.042	57.7236	10199.9	0.514398	29.1727	1.35696	63.5994	3.50256	13.5435	17.1296	81.877	162.684	277.576	854.253
13ZA76A-20.1	1.07445	11.1188	378.913	224.1	260.398	2.24238	261.907	2.38614	152.67	171.437	-71.5015	23.9987	0.805051	0.0600689	4.43536	24.33	0.857458	0.0491227	7.3185	0.278381	7.36856	0.0411014	0.857458	0.116367	609.936	1.55993	32.2999	4.19187	3.73906	1.07744	16.1985	4.52861	58.3113	22.5122	96.4393	193.155	36.9637	7549.78	0.422011	6.78136	6.58199	52.6916	9.17258	25.2639	19.1375	81.3997	125.446	237.038	602.746
13ZA76A-26.1	-0.0378595	-1.19127	175.156	39.8421	261.119	2.44351	261.997	2.49764	182.813	81.5584	-43.4026	24.2001	0.931226	0.0511707	2.78446	24.2427	0.939494	0.0497606	3.50101	0.283013	3.62488	0.0412495	0.939494	0.25918	1123.07	0.00774205	5.2871	0.170074	1.18479	0.435656	13.111	6.36846	95.7125	42.1258	217.377	496.848	93.7041	12820.2	0.336942	78.2243	0.0326669	8.62496	0.372154	8.00531	7.73811	65.8844	176.412	389.075	1358.61
13ZA76A-14.1	0.674363	5.22796	453.913	401.224	261.369	2.06583	265.727	2.44549	286.08	72.1131	8.75027	24.0044	0.792281	0.0568846	1.62469	24.1506	0.810079	0.0520379	3.15409	0.297094	3.25646	0.0414069	0.810079	0.248761	749.645	4.65762	76.1777	9.712	6.71156	2.03733	29.2099	7.61987	83.2375	28.1725	124.551	236.204	43.8662	9518.41	0.443542	6.08083	19.6524	124.27	21.2516	45.3484	36.1871	146.784	211.077	338.364	778.443
13ZA76A-35.1	0.113368	0.864587	293.789	230.907	261.689	2.18302	259.464	2.55997	292.871	47.9633	10.7857	24.1099	0.834367	0.0523955	2.05562	24.116	0.834751	0.0521928	2.10038	0.298405	2.26018	0.0414663	0.834751	0.369329	533.413	0.00920976	39.601	0.486527	1.40279	0.675117	10.8779	3.81449	41.942	18.5135	88.3055	199.271	43.9502	10299.8	0.526816	317.615	0.0388598	64.602	1.06461	9.4783	11.9914	54.6631	105.664	170.496	551.909
13ZA76A-22.1	0.765586	9.95436	522.978	231.808	261.92	3.00556	261.727	3.24597	235.516	114.988	-11.3589	23.9309	1.13541	0.0576282	3.44823	24.1332	1.15185	0.0509048	4.98369	0.290834	5.11507	0.0414367	1.15185	0.225188	712.722	49.5202	170.957	37.4385	14.4495	2.39576	27.1188	6.61176	74.8325	27.1326	122.943	266.798	51.9875	8661.79	0.368919	2.13162	208.946	278.886	81.9224	97.6316	42.5535	136.276	183.151	304.197	768.391
13ZA76A-19.1	14.4415	62.7729	272.886	194.542	261.489	5.00274	264.661	6.52493	-415.542	1649.1	165.299	20.6676	1.26794	0.167228	6.01143	24.5312	2.9319	0.0390353	63.0289	0.219402	63.097	0.0407643	2.9319	0.0464665	780.298	16.6211	34.966	4.27617	3.8857	1.36782	25.857	7.54585	90.6919	27.7081	126.266	231.642	43.5173	8770.15	0.415962	2.22669	70.1314	57.0407	9.35705	26.2547	24.2952	129.935	209.026	368.666	789.16
13ZA76A-2.1	-0.135484	-1.16326	273.329	182.253	262.898	2.2112	258.952	2.54187	231.16	1730.1	-13.9117	24.0565	0.841883	0.050428	2.10036	24.0451	4.81752	0.0508088	74.9248	0.291349	75.0795	0.0415885	4.81752	0.0641655	971.736	0.0528922	14.944	2.63465	4.40838	1.4309	28.8294	9.09042	97.5692	36.5827	168.532	323.428	61.1749	8351.1	0.386902	21.4922	0.223174	24.3784	5.7651	29.7863	25.4156	144.871	251.812	396.623	1053.32
13ZA76A-33.1	0.106821	1.72742	593.003	226.401	263.871	3.25857	263.504	3.49725	283.547	36.5924	7.03074	23.908	1.24745	0.0523921	1.48581	23.9203	1.24798	0.0519803	1.59976	0.299621	2.02896	0.0418055	1.24798	0.615084	1824.99	0.0954927	13.1165	0.764994	2.30316	0.537807	21.9493	10.43	142.092	67.4224	352.197	860.074	171.9	12575.2	0.23057	26.0542	0.402923	21.3973	1.67395	15.5619	9.55252	110.298	288.919	577.611	2201.23
13ZA76A-16.1	-0.0319836	-0.293395	711.019	490.973	264.744	1.98705	264.253	2.46296	237.949	33.7648	-11.4107	23.8606	0.755392	0.0512991	1.37582	23.8708	0.755989	0.0509585	1.46405	0.294341	1.64771	0.0418922	0.755989	0.458812	1338.15	0.116892	33.9334	3.13898	6.84073	2.17167	40.4303	13.097	151.952	52.3654	233.846	440.876	83.3836	9323.14	0.398052	30.0755	0.493215	55.3562	6.86866	46.2211	38.5733	203.167	362.799	617.692	1461.54
13ZA76A-18.1	-0.0585076	-0.498463	451.205	324.439	265.665	2.11924	263.953	2.37223	204.835	70.9454	-30.0967	23.7825	0.787868	0.0511071	2.83565	23.8084	0.790369	0.0502342	3.05772	0.290918	3.15822	0.042002	0.790369	0.250258	971.56	0.0659432	51.9622	1.11405	2.87719	0.515186	25.2416	8.48698	104.779	38.3509	171.253	301.307	54.8552	10142.4	0.184277	102.925	0.278241	84.767	2.43775	19.4404	9.15073	126.842	235.096	425.929	1070.33
13ZA76A-32.1	-0.0996769	-1.23773	218.103	112.625	265.991	2.365	265.712	2.58493	253.432	60.724	-5.02203	23.7625	0.88734	0.0507844	2.46657	23.7472	0.889683	0.0513022	2.64038	0.297869	2.78625	0.0421102	0.889683	0.319313	510.89	0.015486	19.7092	0.506514	1.26385	0.577084	11.3466	3.42692	37.319	18.2721	91.4216	223.874	48.2776	8866.94	0.464522	119.474	0.065342	32.152	1.10835	8.53955	10.2502	57.0183	94.9284	151.703	571.385
13ZA76A-39.1	1.96373	12.9557	87.5517	71.3899	265.924	8.01789	263.682	9.03783	437.593	411.262	39.7352	23.2787	2.81929	0.0673248	13.7439	23.6244	2.86779	0.0556532	18.4757	0.324811	18.697	0.0423291	2.86779	0.153382	426.043	0.305924	15.0179	1.33254	2.29081	0.572155	16.1843	4.2983	45.3217	17.4434	70.286	118.102	21.3204	6903.94	0.286431	12.628	1.29082	24.499	2.91585	15.4785	10.1626	81.3283	119.066	184.235	439.288
13ZA76A-6.1	-0.0168089	-0.124545	456.099	378.933	266.507	2.16702	264.812	3.04243	237.275	43.1555	-12.4851	23.6959	0.816628	0.0514603	1.70943	23.7112	0.817899	0.0509436	1.871	0.296236	2.04196	0.0421741	0.817899	0.400546	1631.37	0.200702	21.5705	4.29407	8.02393	2.91784	57.6544	16.4548	163.863	62.2367	273.554	485.513	89.4336	8020.15	0.413524	12.4744	0.846845	35.1884	9.39622	54.2158	51.8266	289.72	455.812	666.111	1709.71
13ZA76A-9.1	0.109109	0.377845	577.821	1026.74	266.745	2.66099	262.737	3.88401	300.621	33.9972	11.4181	23.6446	1.00627	0.0524752	1.4742	23.6477	1.00635	0.0523703	1.49085	0.30535	1.79872	0.0422875	1.00635	0.559484	994.699	0.0284973	114.938	1.45326	4.28674	1.54605	34.4576	9.79557	95.1786	38.3384	166.714	281.043	50.6656	10212.8	0.387763	303.224	0.120242	187.502	3.17999	28.9645	27.4609	173.154	271.345	386.905	1041.96
13ZA76A-1.1	-0.0193865	-0.0885913	225.643	309.161	267.619	2.37233	265.783	3.21566	248.309	57.8551	-7.88133	23.596	0.884568	0.0514647	2.44049	23.6042	0.88524	0.0511881	2.51331	0.299007	2.66465	0.0423654	0.88524	0.332216	2255.23	0.0719686	47.3618	5.37713	13.2112	6.07058	91.2478	25.432	248.906	91.5866	353.418	529.292	91.3989	9297.32	0.532963	40.8745	0.303665	77.2623	11.7662	89.2649	107.826	458.532	704.487	1011.81	2208.86
13ZA76A-7.1	0.000470146	0.00268985	199.211	219.442	269.053	2.53872	268.04	3.10414	372.916	122.041	28.2191	23.463	0.908453	0.0516561	4.63531	23.3925	0.933029	0.0540683	5.42094	0.31869	5.50065	0.0427488	0.933029	0.169621	1549.01	0.132734	27.0956	4.47208	8.62856	4.49937	57.6106	16.5659	170.326	61.8437	258.884	425.025	77.0248	6958.8	0.615149	18.881	0.560059	44.2017	9.78574	58.3011	79.9178	289.5	458.89	692.384	1618.03
13ZA76A-8.1	0.0634076	0.396339	468.62	460.594	269.367	3.30003	267.392	4.1223	250.933	47.0596	-7.44573	23.4203	1.2365	0.0521679	1.72851	23.4473	1.23828	0.0512465	2.04531	0.301352	2.39094	0.0426489	1.23828	0.517904	1890.52	0.150846	28.2741	6.56298	10.5996	4.20195	73.3226	20.1247	204.453	73.5109	308.412	532.333	96.3202	7813.55	0.459447	15.2561	0.636482	46.1241	14.361	71.6191	74.635	368.455	557.471	831.112	1927.58
13ZA76A-10.1	-0.217539	-1.92067	184.479	128.073	269.569	4.59413	267.485	5.16227	126.855	81.5472	-114.057	23.4682	1.71853	0.0499197	2.78595	23.5072	1.72254	0.0485856	3.46461	0.284976	3.86919	0.0425402	1.72254	0.445194	529.128	0.0108103	29.6767	0.365106	1.40447	0.540848	10.9254	4.0059	53.3935	20.0927	95.2639	196.447	38.332	10425.9	0.420871	253.605	0.0456131	48.4122	0.798919	9.48966	9.60654	54.9016	110.967	217.047	595.399
13ZA76A-21.1	-0.239815	-2.6272	203.289	114.385	270.023	4.24328	268.339	4.64151	124.441	76.1442	-118.61	23.4331	1.5843	0.0497512	2.63383	23.4686	1.58791	0.0485358	3.23361	0.285152	3.60245	0.0426102	1.58791	0.440785	697.229	0.0204214	15.8785	0.930706	1.90016	0.711928	14.6436	5.34426	69.1234	25.7701	119.68	240.05	46.1494	7708.8	0.411402	61.8348	0.0861662	25.903	2.03656	12.8389	12.6453	73.5858	148.04	280.989	747.999
13ZA76A-29.1	8.24746	42.0302	352.837	249.328	270.838	2.73354	266.695	3.08599	371.319	318.344	27.4199	21.3831	0.789778	0.11783	4.05973	23.2373	1.05526	0.05403	14.1365	0.320591	14.1758	0.0430343	1.05526	0.074441	1320.67	1.23748	22.4417	2.6429	4.97779	1.35469	34.549	11.1997	121.927	51.2927	222.119	387.798	70.4955	7551.4	0.314886	6.66221	5.22142	36.6096	5.78315	33.6337	24.062	173.613	310.242	495.638	1388.24
13ZA76A-15.1	0.0184161	0.218832	380.747	196.149	273.286	2.19471	272.19	2.39229	146.348	69.6051	-87.9488	23.0878	0.80547	0.0518955	1.82092	23.1715	0.817029	0.0489903	2.96792	0.291513	3.07832	0.0431565	0.817029	0.265413	452.448	1.2553	35.5038	3.85537	3.19486	1.17261	12.9008	3.6318	40.4174	16.9387	72.5041	154.384	30.6328	8831.41	0.55676	8.66442	5.29663	57.918	8.43625	21.5869	20.8279	64.828	100.604	164.298	453.151
13ZA76A-25.1	9.89835	42.7155	302.26	261.819	273.389	9.51846	269.543	10.6499	97.6366	996.129	-182.543	20.7983	2.66353	0.131137	12.7589	23.1915	2.83149	0.0479878	42.0922	0.285301	42.1873	0.0431193	2.83149	0.067117	875.498	0.327835	71.6368	1.02027	2.61774	1.03276	21.5467	7.74647	89.5709	34.0066	152.618	281.61	50.9418	10431.8	0.419175	66.5002	1.38327	116.863	2.23254	17.6875	18.3439	108.275	214.584	364.11	953.866
13ZA76A-12.1	0.211455	3.9704	361.805	126.526	274.265	3.23884	275.172	3.41488	361.141	44.3821	24.38	22.9592	1.19044	0.053466	1.88692	22.95	1.19111	0.0537866	1.96731	0.323141	2.29979	0.043573	1.19111	0.51792	244.882	0.104624	14.3526	0.328188	0.44617	0.255877	3.87356	1.58217	21.1147	8.57183	47.7003	126.796	29.561	11457.8	0.593301	41.5839	0.441451	23.4137	0.718137	3.01466	4.54489	19.4651	43.8273	85.8321	298.127
13ZA76A-5.1	-0.391904	-4.27186	206.505	116.298	274.378	2.44698	272.142	2.69588	115.563	60.5591	-139.364	23.0883	0.891473	0.0486292	2.48822	23.0962	0.892131	0.0483533	2.56752	0.28866	2.7181	0.0432971	0.892131	0.328219	1241.47	0.102625	13.7469	2.36332	4.97503	0.881962	34.5999	11.4074	122.097	49.5141	210.758	328.089	58.7656	8435.63	0.20491	14.9861	0.433017	22.4256	5.17137	33.6151	15.6654	173.869	315.996	496.331	1317.24
13ZA76A-4.1	-0.0260562	-0.506756	595.208	188.69	275.118	3.14769	274.463	3.28786	273.716	33.2014	-0.519283	22.941	1.15628	0.0515802	1.41303	22.9359	1.15649	0.0517575	1.44895	0.311142	1.85389	0.0435997	1.15649	0.623817	681.251	0.0321209	9.26953	0.49911	1.54153	0.17314	15.1498	5.61822	67.7559	27.1794	115.15	224.181	39.8257	9923.43	0.109211	39.3041	0.135531	15.1216	1.09214	10.4157	3.07531	76.1295	155.629	275.43	719.688
13ZA76A-36.1	0.187906	1.58041	509.583	376.699	276.543	3.73591	275.881	4.23917	325.438	34.9946	15.2297	22.7714	1.3662	0.0533288	1.44228	22.7823	1.36662	0.0529447	1.5414	0.320425	2.06	0.0438937	1.36662	0.663411	1196.74	0.0859511	51.4385	1.8353	3.39921	1.34574	22.6692	8.48716	103.661	44.1414	218.467	491.848	98.41	9626.77	0.467308	69.5313	0.362663	83.9127	4.01598	22.9676	23.903	113.916	235.101	421.386	1365.42
13ZA76A-17.1	6.55819	43.1093	210.841	99.3467	277.995	2.89939	272.337	3.01513	20.3026	485.561	-1287.67	21.2043	0.898129	0.104467	4.00507	22.8452	1.35945	0.0464559	20.2218	0.28038	20.2675	0.0437728	1.35945	0.0670754	910.098	0.632923	25.8874	1.24189	1.9377	0.683357	16.4926	6.5341	87.0809	35.1318	159.443	309.382	56.8942	11486	0.368476	15.6763	2.67056	42.2307	2.71749	13.0926	12.1378	82.8773	181	353.987	996.52
13ZA76A-40.1	0.836901	5.52703	541.392	473.269	282.772	2.18468	280.133	2.59608	276.161	71.4194	-2.4277	22.1142	0.776944	0.0586784	1.36937	22.305	0.796219	0.0518128	3.11819	0.320285	3.21824	0.044833	0.796219	0.247408	1437.73	0.92544	48.9903	3.10914	5.21151	1.12162	35.4272	11.7749	141.147	55.0607	236.859	441.712	82.7507	9207.76	0.25162	15.5056	3.90481	79.919	6.80338	35.2129	19.9223	178.026	326.173	573.769	1480.37
13ZA76A-3.1	0.0744428	1.23982	222.673	83.6142	326.026	3.73462	325.636	3.98897	240.355	71.4888	-36.2245	19.2626	1.15594	0.0535572	2.03738	19.3236	1.16458	0.0510117	3.10111	0.363985	3.31257	0.0517502	1.16458	0.351563	800.918	0.0271428	7.34509	1.21189	2.61986	0.125161	21.3618	6.91979	76.6063	32.3554	147.032	277.6	52.2049	10552.4	0.0509986	21.7425	0.114527	11.9822	2.65185	17.7018	2.2231	107.346	191.684	311.408	918.952
13ZA76A-13.1	0.0488206	1.06399	297.569	83.4279	465.742	3.88522	464.552	4.00435	436.113	41.6329	-6.94375	13.3407	0.84577	0.0567592	1.52771	13.3595	0.848704	0.0556163	1.86986	0.574002	2.05345	0.0748531	0.848704	0.413305	722.918	0.19172	6.53027	0.579549	1.38518	0.209373	13.4486	5.01056	67.869	26.7917	133.348	263.258	50.633	10140.3	0.147869	10.5178	0.808944	10.653	1.26816	9.35932	3.71888	67.5808	138.797	275.89	833.424
13ZA76A-23.1	0.0434674	3.15973	617.535	54.4448	488.739	3.70342	488.8	3.68522	493.551	24.4618	0.997207	12.6907	0.771386	0.0573056	1.06827	12.6943	0.771643	0.057077	1.10961	0.619948	1.35154	0.0787758	0.771643	0.570934	2381.9	0.0459779	1.23534	0.618068	3.15365	0.222443	37.4703	16.1919	211.639	90.6556	420.783	795.144	142.506	11658.9	0.0623761	3.93427	0.194	2.01523	1.35245	21.3085	3.95104	188.293	448.528	860.321	2629.89
13ZA76A-38.1	0.581767	9.41782	304.623	134.821	497.431	6.42739	503.171	6.79551	483.946	71.3728	-2.85129	12.3933	1.31057	0.0619041	2.27082	12.4712	1.31848	0.0568291	3.23219	0.628296	3.49077	0.0801849	1.31848	0.377704	1101.38	7.05384	65.5563	23.8669	17.1732	2.88354	57.3001	14.3523	122.513	45.3156	160.853	225.693	37.7246	8001.35	0.280203	2.71253	29.763	106.943	52.2253	116.035	51.2175	287.94	397.57	498.019	1005.33
13ZA76A-24.1	4.80673	32.5049	119.011	71.6407	531.48	5.97315	523.997	6.37386	659.049	244.277	19.8158	11.0767	1.03703	0.0971995	3.98823	11.5857	1.25494	0.0615923	11.3941	0.733001	11.463	0.0863132	1.25494	0.109477	469.46	0.287492	16.4856	1.48418	2.83899	0.249871	18.4024	5.72901	58.3637	19.0768	73.5404	111.193	19.1873	9311.99	0.105377	13.5495	1.21305	26.8934	3.24765	19.1824	4.4382	92.4746	158.698	237.251	459.628
13ZA76A-28.1	1.72376	29.6365	138.939	49.7491	1721.03	25.8921	1730.71	24.5476	1955.96	35.6508	12.1985	3.21157	1.51764	0.120404	1.98177	3.21295	1.51785	0.120035	1.99664	5.15116	2.50807	0.31124	1.51785	0.605185	828.402	0.0128841	7.00741	0.352796	1.5315	0.203343	16.6438	6.2838	83.4752	33.1194	150.065	273.498	50.2958	10532.3	0.12277	55.8009	0.0543631	11.4313	0.771983	10.348	3.61178	83.6372	174.067	339.33	937.904
Spot Name	7-corr %com 206	7-corr %com 208	ppm U	ppm Th	207corr 206Pb /238U Age	1s err	208corr 206Pb /238U Age	1s err	204corr 207Pb /206Pb Age	1s err	% Dis- cor- dant	Total 238 /206	% err	Total 207 /206	% err	4corr 238 /206*	% err	4corr 207* /206*	% err	4corr 207* /235	% err	4corr 206* /238	% err	err corr	Y (ppm)	La (ppm)	Ce (ppm)	Nd (ppm)	Sm (ppm)	Eu (ppm)	Gd (ppm)	Tb (ppm)	Dy (ppm)	Ho (ppm)	Er (ppm)	Yb (ppm)	Lu (ppm)	Hf (ppm)	Eu (star)	Ce (star)	La (ch)	Ce (ch)	Nd (ch)	Sm (ch)	Eu (ch)	Gd (ch)	Tb (ch)	Dy (chn)	Er (ch)
12ZA05B-13.1	4.36773	26.9901	769.208	796.855	232.384	4.43476	242.797	5.58071	601.273	129.287	62.0198	26.0534	1.92477	0.0857837	1.3568	26.9326	1.97144	0.0599623	5.97271	0.306974	6.28966	0.0371298	1.97144	0.313442	1914.58	121.124	578.789	180.913	81.4138	16.6659	156.662	28.5972	216.696	71.1868	278.347	497.526	92.4215	11016.1	0.449828	2.09915	511.072	944.191	395.87	550.093	296.019	787.245	792.167	880.876	1739.67
12ZA05B-5.1	1.23216	15.8973	373.812	235.287	269.279	4.43862	278.628	4.9674	17.1646	222.692	-1489.47	23.1541	1.6603	0.0615374	2.37572	23.5968	1.7339	0.0463953	9.26877	0.271095	9.42955	0.0423786	1.7339	0.183879	1022.72	16.3076	94.3692	43.452	22.2831	3.65325	49.7947	10.7904	102.672	39.588	171.714	344.105	66.7075	10607.7	0.33431	1.90328	68.8083	153.946	95.0809	150.561	64.8889	250.225	298.904	417.366	1073.21
12ZA05B-3.1	0.677672	7.3538	740.139	401.987	272.018	1.76591	271.617	1.95817	115.326	109.271	-137.768	23.0447	0.647891	0.0571539	1.60211	23.2995	0.695627	0.0483484	4.63256	0.286113	4.6845	0.0429194	0.695627	0.148496	1293.89	16.0108	78.2897	24.3196	11.7503	3.91466	38.7844	12.3781	138.438	45.683	224.603	425.49	82.0451	10837.8	0.558971	2.13006	67.556	127.716	53.2157	79.3942	69.5322	194.896	342.883	562.754	1403.77
12ZA05B-18.1	0.0409284	0.359703	372.141	282.705	274.26	4.6135	275.736	5.85531	320.979	59.1479	14.7528	22.9989	1.69919	0.0520981	2.20191	22.9776	1.70184	0.0528408	2.60321	0.317079	3.11014	0.0435207	1.70184	0.547191	885.538	0.299708	45.5979	1.71614	2.88689	1.16568	21.7246	7.16755	81.1301	34.3133	142.162	259.091	49.096	7916.18	0.44868	34.1343	1.26459	74.3849	3.75524	19.506	20.7048	109.169	198.547	329.797	888.511
12ZA05B-16.1	0.21981	2.16796	236.464	145.224	304.498	2.46588	303.167	2.84404	385.575	85.2479	21.3397	20.6291	0.802858	0.0542256	2.60944	20.6253	0.824442	0.0543735	3.79506	0.363486	3.88358	0.0484841	0.824442	0.212289	520.487	0.0172155	14.7708	0.811554	1.74546	0.787548	11.5517	3.49043	40.3732	18.7678	85.5249	202.516	43.8795	8878.38	0.534624	67.0901	0.0726391	24.0959	1.77583	11.7937	13.9884	58.0485	96.6877	164.119	534.531
12ZA05B-14.1	13.1187	91.54	1853.94	4221.29	326.286	6.19542	488.543	10.6366	739.213	177.707	56.6786	16.7343	1.86498	0.1585	2.17774	18.998	1.92159	0.0639547	8.39857	0.464158	8.6156	0.0526371	1.92159	0.223036	7190.62	135.236	2543.04	467.32	295.119	93.6923	817.372	155.785	1035.86	272.094	1081.55	2171.04	361.475	15673.4	0.581493	5.4309	570.615	4148.51	1022.58	1994.04	1664.16	4107.4	4315.37	4210.82	6759.69
12ZA05B-8.1	0.249619	1.7394	126.213	114.463	367.345	3.997	366.778	4.8261	522.214	134.025	30.1689	17.0109	1.08268	0.0559476	3.35278	16.9711	1.14526	0.0578258	6.10941	0.469799	6.21583	0.0589236	1.14526	0.184249	907.168	0.0199059	63.8201	1.39685	3.51859	1.11367	23.5098	7.84232	90.601	35.6433	156.952	301.079	57.0531	9052.33	0.373246	205.478	0.083991	104.111	3.05656	23.7743	19.7809	118.139	217.239	368.297	980.949
12ZA05B-9.1	-0.295395	-3.66812	155.942	81.0887	379.083	3.76933	377.862	4.09415	339.985	92.9128	-11.7129	16.559	0.992942	0.0518331	3.09931	16.5292	1.00984	0.0532854	4.10312	0.444485	4.22556	0.0604988	1.00984	0.238984	2236.63	0.057458	2.58784	3.68816	8.17921	0.541568	64.0189	21.2229	240.825	89.6881	366.615	565.743	99.4668	8842.25	0.0721426	3.01807	0.242439	4.2216	8.07037	55.2649	9.61932	321.703	587.892	978.964	2291.35
12ZA05B-10.1	0.0857102	0.422938	834.568	1056.32	401.136	4.18181	397.675	5.29419	420.64	34.9622	4.72599	15.5622	1.05876	0.0554445	1.3174	15.5663	1.06031	0.0552316	1.56603	0.489218	1.89122	0.0642412	1.06031	0.560648	4057.1	0.41745	109.862	9.77916	17.4148	3.94015	109.028	31.5496	370.87	141.431	636.647	1183.54	216.067	7649.35	0.275635	29.1921	1.76139	179.22	21.3986	117.667	69.985	547.878	873.95	1507.6	3979.04
12ZA05B-12.1	0.196865	3.2765	304.749	127.509	466.957	7.64501	469.722	8.0713	465.199	69.614	-0.386204	13.285	1.66713	0.0579908	1.98872	13.3119	1.67532	0.0563494	3.14237	0.583646	3.56107	0.0751206	1.67532	0.470454	903.898	1.46916	25.6536	3.42012	3.46362	0.681983	18.0548	6.66864	80.6965	35.069	156.845	291.935	53.1537	11595.5	0.262882	6.14418	6.19899	41.8492	7.48386	23.4028	12.1134	90.7278	184.727	328.034	980.282
12ZA05B-15.1	0.0650693	0.690132	1189.13	674.057	475.65	9.03405	472.104	9.92646	455.465	27.4889	-4.53117	13.0505	1.94056	0.0571441	0.956315	13.0673	1.94128	0.0561026	1.23876	0.591969	2.30285	0.076527	1.94128	0.842992	8460.01	1.05526	21.4857	5.07624	14.9131	1.87756	156.94	60.7712	767.479	309.901	1377.65	2390.32	410.018	10466.4	0.118302	4.98392	4.45256	35.0501	11.1077	100.764	33.3492	788.646	1683.41	3119.83	8610.33
12ZA05B-1.1	0.194101	1.28801	135.267	139.604	498.881	5.69713	503.592	6.92779	669.632	99.0906	26.068	12.4041	1.14692	0.0587923	3.0853	12.3566	1.17951	0.0618973	4.63007	0.690678	4.77795	0.0809286	1.17951	0.246865	1815.06	0.0293586	36.3556	2.23778	4.83966	2.00977	45.6047	15.4443	190.609	71.7884	316.655	535.217	100.351	8530.42	0.412367	76.1495	0.123876	59.3077	4.89667	32.7004	35.6976	229.169	427.819	774.832	1979.1
12ZA05B-4.1	0.0140454	0.210179	229.686	96.0108	528.022	4.67971	526.326	4.94758	587.963	60.1755	10.4393	11.7138	0.894644	0.0580935	2.1613	11.6922	0.904432	0.0595951	2.77375	0.702776	2.91748	0.0855274	0.904432	0.310005	294.291	0.0154468	27.2729	0.386822	1.08568	0.210029	7.14564	2.5314	31.3728	10.5133	48.7459	101.46	19.1324	10597.2	0.229857	189.421	0.0651764	44.4909	0.846438	7.33569	3.73054	35.9077	70.1218	127.532	304.662
12ZA05B-6.1	-0.00797416	-0.217064	528.677	132.287	772.709	5.22393	772.957	5.39264	771.496	24.1572	-0.162317	7.85322	0.692855	0.0649122	1.05892	7.85295	0.693734	0.0649406	1.14766	1.14021	1.34104	0.127341	0.693734	0.517309	1926.14	0.441155	8.94722	1.13251	3.20698	0.349918	36.8165	14.9889	192.679	71.7512	332.983	556.557	99.4395	12527.1	0.0981627	6.79584	1.86141	14.5958	2.47814	21.6688	6.21524	185.007	415.204	783.25	2081.15
12ZA05B-17.1	1.38336	26.9267	209.569	92.6534	795.437	12.9886	817.28	13.6324	941.422	106.191	15.9922	7.50918	1.64073	0.0771186	4.12321	7.57036	1.6545	0.0704781	5.1821	1.28363	5.43981	0.132094	1.6545	0.304146	943.089	2.91602	16.5512	4.55531	4.57155	0.734124	25.8122	8.5559	91.7437	33.9575	158.342	301.946	56.2993	9291.6	0.206003	2.43807	12.3039	27.0003	9.96787	30.8889	13.0395	129.71	237.006	372.942	989.636
12ZA05B-11.1	-0.0106421	-0.265077	176.018	48.8082	1066.53	15.3848	1066.19	15.2876	1076.16	31.282	0.928652	5.55869	1.49126	0.0748696	1.4425	5.55571	1.49227	0.0753192	1.55817	1.86925	2.15749	0.179995	1.49227	0.691671	520.922	0.00739938	7.98684	0.418813	1.4206	0.160179	11.2335	4.1323	52.6458	18.3761	90.4464	171.889	32.7116	11190.2	0.122225	77.0263	0.031221	13.0291	0.916441	9.59867	2.8451	56.45	114.468	214.007	565.29
12ZA05B-7.1	-0.400404	-6.18497	266.064	117.301	1346.33	11.072	1337.37	11.0418	1273.83	22.9523	-5.91334	4.32279	0.847376	0.0829879	1.01956	4.32155	0.849338	0.0832329	1.17669	2.65556	1.4512	0.231399	0.849338	0.585268	2694.96	0.0174162	6.06285	1.41602	4.46876	0.295344	48.0951	19.5399	244.7	102.34	456.697	773.003	131.843	10613.6	0.0614093	20.727	0.0734862	9.89046	3.09852	30.1943	5.2459	241.684	541.272	994.714	2854.35
12ZA05B-2.1	5.87511	61.2034	119.004	78.7735	2138.61	12.3708	2224.6	11.0837	2694.81	21.6634	19.4939	2.39256	0.5	0.185021	1.25919	2.39348	0.506246	0.184699	1.31143	10.6399	1.40575	0.417802	0.506246	0.360126	840.128	0.291966	19.4836	1.82473	2.8319	0.636677	24.0089	7.0166	85.9683	31.507	135.684	229.906	43.8702	10993.6	0.235366	14.331	1.23192	31.784	3.99284	19.1344	11.3087	120.648	194.366	349.465	848.023
Spot Name	7-corr %com 206	7-corr %com 208	ppm U	ppm Th	207corr 206Pb /238U Age	1s err	208corr 206Pb /238U Age	1s err	204corr 207Pb /206Pb Age	1s err	% Dis- cor- dant	Total 238 /206	% err	Total 207 /206	% err	4corr 238 /206*	% err	4corr 207* /206*	% err	4corr 207* /235	% err	4corr 206* /238	% err	err corr	Y (ppm)	La (ppm)	Ce (ppm)	Nd (ppm)	Sm (ppm)	Eu (ppm)	Gd (ppm)	Tb (ppm)	Dy (ppm)	Ho (ppm)	Er (ppm)	Yb (ppm)	Lu (ppm)	Hf (ppm)	Eu (star)	Ce (star)	La (ch)	Ce (ch)	Nd (ch)	Sm (ch)	Eu (ch)	Gd (ch)	Tb (ch)	Dy (chn)	Er (ch)
13ZA67-16.1	0.890351	12.526	745.804	375.142	257.702	2.20794	261.999	2.39518	298.086	110.423	13.7215	24.3	0.838398	0.058532	3.0418	24.4903	0.867596	0.0523122	4.8401	0.294517	4.91724	0.0408325	0.867596	0.17644	1443.75	10.5873	66.3763	24.1258	15.0336	3.64547	48.8037	13.7559	146.792	54.7815	237.581	410.822	77.4053	9972.63	0.410247	2.22972	44.6722	108.281	52.7917	101.578	64.7509	245.245	381.049	596.715	1484.88
13ZA67-13.1	0.223166	4.37433	507.285	159.821	263.725	1.86084	263.78	1.95497	345.516	62.6573	23.98	23.8937	0.700889	0.0533214	2.11403	23.8909	0.711061	0.0534158	2.76972	0.308276	2.85954	0.041857	0.711061	0.248663	1380.52	0.782361	22.5196	2.24242	3.86862	1.57776	32.1444	11.0585	134.047	52.6414	235.835	429.317	79.4716	10049.9	0.43128	9.12788	3.3011	36.7367	4.90683	26.1393	28.0242	161.53	306.33	544.906	1473.97
13ZA67-32.1	-0.145231	-1.80004	267.469	135.886	266.559	2.1624	265.748	2.37517	174.523	108.833	-53.4509	23.7217	0.803537	0.0504319	2.76177	23.7467	0.8357	0.049584	4.66472	0.287898	4.73899	0.042111	0.8357	0.176346	351.188	0.00450637	16.4107	0.45258	0.949582	0.304645	6.73851	2.21854	28.5439	11.9607	63.0151	162.357	36.4008	4517.97	0.367109	195.091	0.0190142	26.7711	0.990329	6.41609	5.4111	33.8618	61.4555	116.032	393.845
13ZA67-3.1	0.286044	2.44311	294.29	218.889	266.604	3.94489	266.997	4.51732	325.672	109.779	18.3768	23.6155	1.48706	0.0538905	2.85098	23.6432	1.50889	0.0529501	4.83562	0.308789	5.06557	0.0422954	1.50889	0.297872	1682.11	0.314131	41.819	2.88711	5.27894	1.89612	42.9518	14.1847	163.953	63.3969	282.028	481.815	90.1473	8929.01	0.38384	23.5754	1.32545	68.2202	6.31752	35.6685	33.6788	215.838	392.929	666.477	1762.67
13ZA67-6.1	-0.207646	-1.42421	326.848	299.561	269.082	2.2369	267.608	2.61603	200.01	128.488	-35.0051	23.5093	0.789123	0.0499881	4.74327	23.5051	0.80922	0.0501299	5.53291	0.29406	5.59177	0.0425439	0.80922	0.144716	681.049	0.306517	59.9525	1.71768	2.64244	1.22072	16.9901	5.24411	58.7537	23.3887	111.288	237.76	47.5262	9437.36	0.555346	44.359	1.29332	97.8019	3.75859	17.8543	21.6824	85.3776	145.266	238.836	695.551
13ZA67-11.1	-0.208469	-1.96566	364.36	236.307	269.167	1.98959	267.149	2.25491	232.79	95.5265	-15.8386	23.5018	0.734262	0.0499834	2.38614	23.4766	0.765392	0.0508447	4.13816	0.298614	4.20835	0.0425955	0.765392	0.181875	2501.01	3.82631	36.6065	7.89774	13.2539	3.53371	87.5321	25.0796	257.124	100.423	376.638	558.173	99.0744	6765.24	0.316246	3.5751	16.1448	59.7169	17.2817	89.5532	62.7658	439.86	694.725	1045.22	2353.99
13ZA67-15.1	2.78341	33.4521	360.919	175.337	269.119	4.85964	274.448	5.37802	158.521	240.557	-70.7266	22.8043	1.82002	0.073972	2.01718	23.5277	1.91627	0.0492456	10.2803	0.288595	10.4573	0.0425031	1.91627	0.183247	379.484	18.171	45.6742	12.4291	5.63415	1.33559	14.0112	3.29791	33.5297	12.8947	57.0039	130.375	27.2737	10090.7	0.458216	1.63168	76.6709	74.5093	27.1971	38.0686	23.7228	70.4082	91.3548	136.299	356.275
13ZA67-27.1	-0.151252	-1.64834	536.93	289.417	270.404	6.04592	267.753	6.60262	219.085	64.1667	-23.7438	23.3787	2.26294	0.0504699	1.90512	23.3766	2.2665	0.0505441	2.77276	0.29812	3.58123	0.0427779	2.2665	0.632884	1079.49	0.480324	63.6079	1.45448	2.92506	1.15118	20.8561	7.54241	95.5588	37.7015	180.13	378.066	75.5351	4201.72	0.44927	40.8566	2.02668	103.765	3.18266	19.7639	20.4472	104.804	208.931	388.45	1125.81
13ZA67-20.1	-0.0430694	-0.870275	459.142	147.271	270.775	2.14544	270.791	2.12581	287.299	106.837	5.82888	23.3208	0.749121	0.0513458	4.52072	23.2999	0.754747	0.0520656	4.67389	0.308105	4.73443	0.0429187	0.754747	0.159417	1331.17	0.00934617	13.2022	0.963889	3.17161	0.781766	27.3555	9.38028	115.633	51.1207	230.794	452.286	82.1251	9455.26	0.255837	74.677	0.0394353	21.537	2.10917	21.4298	13.8857	137.465	259.841	470.053	1442.47
13ZA67-19.1	0.478259	6.80608	521.8	226.545	270.924	4.92078	271.44	5.27829	282.781	90.7424	4.24966	23.1863	1.83612	0.0555297	1.90467	23.2899	1.84929	0.0519629	3.96655	0.307629	4.37646	0.0429371	1.84929	0.422554	550.037	1.67179	41.3995	2.47243	2.22401	0.768004	11.1405	4.05923	45.0586	18.5595	92.7278	213.77	42.465	10844.6	0.470318	10.9324	7.05396	67.5359	5.41013	15.0271	13.6413	55.9822	112.444	183.165	579.549
13ZA67-24.1	17.2074	67.669	183.614	116.125	272.676	9.79717	272.434	11.1502	721.821	898.993	62.9938	19.1622	2.57644	0.189736	9.00789	22.8072	3.40238	0.063432	42.3671	0.383475	42.5035	0.0438458	3.40238	0.0800495	233.391	2.80481	12.4047	2.12721	1.85028	1.53531	7.05547	1.87732	21.1701	7.94339	39.8536	97.3235	23.2971	3357.45	1.29528	2.72646	11.8346	20.236	4.65474	12.5019	27.2702	35.4546	52.0032	86.0574	249.085
13ZA67-7.1	5.56508	32.7518	769.656	716.703	273.501	2.53505	280.992	3.20442	221.281	328.476	-23.9243	21.7895	0.638085	0.0963863	5.41917	23.1069	0.8553	0.0505921	14.1997	0.301885	14.2254	0.0432771	0.8553	0.0601247	1701.27	35.7871	228.354	60.2837	37.7065	14.7422	100.058	22.421	184.906	65.1468	256.618	463.179	86.0782	9365.27	0.73161	2.63947	151.001	372.519	131.912	254.773	261.852	502.802	621.081	751.65	1603.86
13ZA67-2.1	-0.120609	-1.3663	378.455	205.119	274.152	2.24795	272.692	2.37579	274.659	123.312	0.187081	23.0453	0.779824	0.0508	4.54732	23.0172	0.803812	0.0517789	5.3824	0.310171	5.44209	0.0434457	0.803812	0.147703	723.402	0.00826327	34.2527	0.633462	1.62443	0.386555	13.4846	5.0989	64.2817	26.0364	126.217	268.263	54.3589	11056	0.251762	254.174	0.0348661	55.8772	1.38613	10.9759	6.86598	67.7619	141.244	261.308	788.858
13ZA67-17.1	0.161647	2.60078	449.341	179.624	275.462	2.11836	275.921	2.09082	258.772	136.027	-6.53901	22.8687	0.702042	0.0530936	5.11286	22.9164	0.722408	0.0514215	5.92039	0.309385	5.9643	0.0436368	0.722408	0.121122	536.569	0.969569	28.3531	3.18066	3.36074	0.922115	15.1867	4.32207	48.7719	18.7825	88.9499	204.037	41.3475	11222.7	0.393445	8.66812	4.09101	46.2531	6.95987	22.7077	16.3786	76.3152	119.725	198.26	555.937
13ZA67-37.1	0.311949	2.22261	268.815	222.216	275.66	3.57641	272.886	4.19186	469.226	99.7655	41.7986	22.8175	1.30254	0.0543037	2.68608	22.7562	1.32857	0.056452	4.50654	0.342043	4.6983	0.043944	1.32857	0.282777	614.301	0.347754	25.5949	1.56442	2.50332	1.17981	17.4269	5.18162	56.9967	22.1527	98.3534	204.267	43.1796	4614.55	0.544493	18.63	1.46731	41.7535	3.42325	16.9143	20.9558	87.5724	143.535	231.694	614.708
13ZA67-14.1	-0.0816911	-0.993211	330.296	168.576	276.961	2.17247	275.915	2.42373	292.631	73.1042	5.42878	22.7977	0.778255	0.0511756	2.56448	22.769	0.788904	0.0521873	3.2012	0.316025	3.29698	0.0439193	0.788904	0.239281	450.859		36.8816	0.387332	0.96553	0.409391	8.53435	2.94981	36.96	14.6645	78.4239	196.356	42.8983	10025.5	0.43473			60.1658	0.847553	6.52385	7.2716	42.8862	81.7122	150.244	490.149
13ZA67-8.1	0.0282057	0.375415	567.481	270.152	278.315	1.89202	278.086	2.04724	312.639	57.3611	11.1302	22.6595	0.6783	0.0520879	1.88434	22.6437	0.687412	0.0526474	2.52082	0.320576	2.61287	0.0441624	0.687412	0.263087	906.925	0.054231	24.6968	0.538338	1.86954	0.451917	16.8066	6.27458	82.7107	32.2894	163.171	333.914	67.4883	10243.9	0.245753	77.5998	0.228823	40.2884	1.17798	12.6321	8.02695	84.4554	173.811	336.222	1019.82
13ZA67-9.1	0.00895196	0.102708	820.781	437.077	278.753	2.9839	277.505	3.24558	299.306	48.0607	6.96187	22.6274	1.07948	0.0519433	1.73783	22.6163	1.08237	0.0523401	2.10707	0.319092	2.36882	0.044216	1.08237	0.456926	1199.09	0.0047465	51.6153	0.840478	2.93404	0.361127	23.0848	9.03771	111.435	44.1123	206.939	392.867	75.2231	11258.3	0.133756	438.733	0.0200274	84.2011	1.83912	19.8246	6.41434	116.004	250.352	452.986	1293.37
13ZA67-10.1	-0.112069	-0.7577	535.486	481.479	279.372	1.94087	276.538	2.38421	191.63	73.6144	-46.4355	22.6036	0.692102	0.0509864	2.06483	22.6327	0.707438	0.0499495	3.16511	0.304295	3.24321	0.0441838	0.707438	0.218129	759.274	0.30393	36.6379	1.32656	2.23821	0.815149	14.9811	5.24938	61.7164	26.9526	125.686	266.847	53.265	8995.22	0.429106	30.978	1.2824	59.7683	2.90276	15.1231	14.4787	75.2818	145.412	250.88	785.535
13ZA67-35.1	-0.091333	-1.09741	181.872	96.2417	279.907	2.55997	279.396	2.83747	129.194	160.117	-118.33	22.5547	0.905024	0.0511649	3.17392	22.6258	0.973131	0.0486339	6.80567	0.296371	6.87489	0.0441973	0.973131	0.141549	886.799	0.00655394	37.5372	0.46781	1.80328	0.485651	15.9335	6.69265	81.2504	34.0612	158.237	294.268	55.1217	4908.02	0.276176	363.955	0.0276538	61.2352	1.02365	12.1843	8.62613	80.0679	185.392	330.286	988.982
13ZA67-25.1	-0.0915379	-0.932875	479.364	291.866	279.977	4.21486	278.707	4.75897	301.942	69.6228	7.37578	22.549	1.52075	0.0511648	2.06781	22.5143	1.52812	0.0524007	3.05384	0.320907	3.41484	0.0444161	1.52812	0.447495	1973.58	0.182863	22.8881	3.37818	6.88103	2.04398	51.8355	16.9929	199.297	75.7773	331.166	579.062	108.803	3922.94	0.329902	15.6343	0.771572	37.3378	7.39209	46.4935	36.3052	260.48	470.717	810.149	2069.79
13ZA67-26.1	0.268664	3.64979	732.904	326.973	280.241	4.79168	279.742	5.10904	206.02	100.312	-36.5363	22.4463	1.72093	0.0540608	3.11314	22.5529	1.72929	0.0502599	4.32434	0.30727	4.65729	0.0443402	1.72929	0.371308	1232.13	4.78908	89.4313	12.1916	9.74704	2.95375	34.5094	11.1291	129.389	46.3674	210.324	389.81	73.3001	4940.76	0.490929	6.28355	20.2071	145.891	26.6774	65.8584	52.4645	173.414	308.284	525.971	1314.52
13ZA67-18.1	6.5322	37.1397	1358.44	1136.57	280.231	2.62079	283.976	3.80767	126.511	280.736	-123.252	21.0373	0.743734	0.104315	4.22947	22.6009	0.850976	0.0485785	11.9266	0.29636	11.9569	0.0442461	0.850976	0.0711703	3277.01	60.4266	439.522	48.7683	28.9756	12.4883	122.316	34.4625	342.872	115.474	508.277	940.654	169.88	10340.4	0.639433	4.3468	254.965	717.002	106.714	195.781	221.817	614.653	954.639	1393.79	3176.73
13ZA67-36.1	0.0248628	0.147742	423.406	424.947	291.631	3.22217	287.565	3.93989	137.991	100.716	-113	21.6031	1.11219	0.0523641	2.13709	21.6986	1.13355	0.0488162	4.28786	0.310194	4.43516	0.0460859	1.13355	0.255583	1074.71	1.97244	41.8333	4.79961	5.40002	2.14192	33.8704	8.83896	101.412	38.3706	170.445	355.848	74.6098	4080.93	0.482775	7.29945	8.32251	68.2436	10.5024	36.4866	38.0448	170.203	244.847	412.242	1065.28
13ZA67-1.1	-0.179092	-1.24903	465.093	423.597	300.152	4.80369	298.978	5.63001	209.752	78.7976	-43.7508	21.0186	1.61789	0.050921	2.2672	21.0338	1.62546	0.0503408	3.3992	0.329993	3.76785	0.0475426	1.62546	0.431403	692.105	0.0146896	43.0199	0.811803	1.76269	0.67113	15.054	4.86404	59.5879	25.202	119.331	261.056	52.9915	9954.85	0.397139	211.501	0.0619813	70.1794	1.77638	11.9101	11.9206	75.6481	134.738	242.227	745.819
13ZA67-28.1	-0.00663776	-0.105591	221.21	85.7446	301.062	2.80394	300.21	2.97432	389.692	104.231	23.0772	20.9175	0.928196	0.0523271	2.74407	20.8617	0.963988	0.0544733	4.64351	0.360028	4.74252	0.0479348	0.963988	0.203265	603.512	0.00791673	15.4639	0.249884	0.991968	0.448464	9.52533	3.63415	47.3321	20.9859	110.1	277.957	63.4336	4388.18	0.444721	186.659	0.0334039	25.2266	0.546792	6.70249	7.96562	47.866	100.669	192.407	688.127
13ZA67-4.1	-0.0733608	-0.715049	485.663	325.084	301.487	3.42865	301.718	3.86998	69.1905	123.163	-340.964	20.9013	1.14558	0.0518009	2.19	21.0153	1.17672	0.0474159	5.17672	0.311093	5.30878	0.0475844	1.17672	0.221655	645.416	2.20735	50.7649	4.1818	4.04686	1.34456	17.4188	5.05615	55.5459	23.0849	106.954	225.402	45.1936	10705.2	0.488158	8.97054	9.31371	82.8139	9.15055	27.3436	23.882	87.5315	140.059	225.796	668.46
13ZA67-31.1	0.221333	3.27876	400.888	192.339	363.32	2.73636	366.616	2.80469	439.319	96.294	17.6005	17.2096	0.716599	0.0556229	3.93321	17.208	0.727552	0.0556964	4.32726	0.44627	4.388	0.0581124	0.727552	0.165805	750.974	1.98315	27.9838	7.3596	5.8979	1.26752	22.5653	6.3981	72.4963	28.0998	125.867	251.726	49.655	4215.84	0.334916	3.93254	8.3677	45.6505	16.1042	39.8507	22.5137	113.393	177.233	294.7	786.67
13ZA67-29.1	-0.160224	-2.3596	312.902	130.181	370.715	5.08266	368.719	5.39008	345.096	55.4525	-7.55829	16.921	1.38898	0.0527232	2.10068	16.9067	1.39167	0.0534059	2.45106	0.435544	2.81859	0.0591482	1.39167	0.493749	854.779	0.011225	38.1163	0.31391	0.992989	0.332029	11.1254	4.86347	67.524	30.8255	152.697	327.478	63.9934	4167.41	0.304506	344.736	0.0473629	62.1799	0.686892	6.70939	5.8975	55.9064	134.722	274.488	954.359
13ZA67-5.1	-0.431501	-6.44287	178.827	81.7915	486.486	4.76647	485.901	5.05499	307.859	119.022	-59.3943	12.8123	0.986622	0.053391	2.6776	12.8257	1.02753	0.0525369	5.22615	0.564787	5.3262	0.0779683	1.02753	0.19292	1527.37	0.0430343	7.38778	1.1989	3.94936	0.473808	33.88	12.7712	149.971	60.2635	254.481	427.291	73.0011	9754.29	0.124858	17.4617	0.181579	12.0518	2.62342	26.6849	8.41577	170.251	353.774	609.639	1590.51
13ZA67-12.1	-0.311675	-4.15346	187.519	88.652	492.035	4.61357	489.087	5.10955	432.833	69.2501	-13.9963	12.6472	0.944341	0.0545064	2.51344	12.6312	0.953159	0.0555344	3.10846	0.606203	3.25131	0.0791689	0.953159	0.293162	1827.75	0.00762514	2.77111	1.7073	5.69039	0.325188	51.2921	17.0465	193.536	74.4377	302.182	483.555	86.7064	9252.35	0.0580212	13.0391	0.0321736	4.52058	3.73588	38.4486	5.77598	257.749	472.203	786.731	1888.64
13ZA67-33.1	0.512038	9.33815	248.651	96.1573	1748.5	39.4417	1750.84	38.2181	1825.26	14.1908	4.29369	3.19296	2.30838	0.111475	0.75316	3.19241	2.30855	0.111626	0.782421	4.82111	2.43754	0.313243	2.30855	0.947083	769.887	0.0197919	19.0632	0.376068	1.22937	0.161092	12.0133	5.26302	69.9419	28.0931	141.711	295.331	56.5064	4658.33	0.127776	118.629	0.0835102	31.0982	0.822906	8.30656	2.86131	60.3683	145.79	284.316	885.691
Spot Name	7-corr %com 206	7-corr %com 208	ppm U	ppm Th	207corr 206Pb /238U Age	1s err	208corr 206Pb /238U Age	1s err	204corr 207Pb /206Pb Age	1s err	% Dis- cor- dant	Total 238 /206	% err	Total 207 /206	% err	4corr 238 /206*	% err	4corr 207* /206*	% err	4corr 207* /235	% err	4corr 206* /238	% err	err corr	Y (ppm)	La (ppm)	Ce (ppm)	Nd (ppm)	Sm (ppm)	Eu (ppm)	Gd (ppm)	Tb (ppm)	Dy (ppm)	Ho (ppm)	Er (ppm)	Yb (ppm)	Lu (ppm)	Hf (ppm)	Eu (star)	Ce (star)	La (ch)	Ce (ch)	Nd (ch)	Sm (ch)	Eu (ch)	Gd (ch)	Tb (ch)	Dy (chn)	Er (ch)
SUT-5.1	0.00136099	0.0102562	416.71	337.106	255.518	1.79782	253.652	2.11973	109.955	85.2182	-134.126	24.7318	0.70057	0.0513597	2.03598	24.8281	0.72154	0.0482385	3.60923	0.267887	3.68064	0.0402769	0.72154	0.196036	1084.52	0.572922	70.6509	1.90056	4.49471	2.1389	32.2457	10.1475	98.4316	43.8891	185.417	336.036	59.8087	8423.73	0.541568	36.3497	2.41739	115.254	4.15878	30.3697	37.9912	162.039	281.094	400.128	1158.86
SUTH-40.1	-0.11448	-1.13563	213.176	138.504	259.481	3.26484	259.149	3.64799	133.885	87.8141	-95.0655	24.3747	1.26446	0.0505075	2.59772	24.4279	1.27386	0.048731	3.73572	0.275055	3.94694	0.0409368	1.27386	0.322746	340.664	0.0620068	24.9858	0.317018	0.810638	0.489534	6.84507	2.45465	28.0603	11.9667	60.0493	146.898	33.2449	9986.07	0.633474	85.332	0.261632	40.7599	0.693694	5.47728	8.69509	34.3973	67.9959	114.066	375.308
SUT-7.1	0.235978	1.31565	453.583	504.478	259.567	2.60965	258.332	4.59012	259.733	67.2226	0.0648035	24.2812	1.00991	0.0533304	1.97491	24.3385	1.01875	0.0514431	2.92628	0.29143	3.09855	0.0410872	1.01875	0.328785	698.557	0.164316	77.1402	1.08631	2.60635	1.15529	19.4355	5.90552	54.7404	25.8132	117.026	223.075	42.5597	9354.19	0.494796	98.0247	0.693317	125.84	2.37705	17.6105	20.5203	97.6659	163.588	222.522	731.411
SUT-9.1	0.287883	1.97573	288.491	250.883	261.187	1.89614	258.916	2.31523	7.83574	140.569	-3277.5	24.1149	0.719723	0.0537829	2.24959	24.3433	0.779119	0.0462156	5.84035	0.261765	5.89209	0.0410791	0.779119	0.132231	497.315	0.339637	44.8046	1.2188	1.60739	0.851122	12.4541	3.94622	39.2482	18.655	87.2921	186.473	37.6674	8169.34	0.579861	37.3869	1.43307	73.0907	2.66697	10.8607	15.1176	62.5836	109.313	159.545	545.576
SUT-19.1	-0.172989	-0.864005	364.95	453.328	261.778	1.8867	259.247	2.56472	83.1537	100.876	-217.72	24.1706	0.716331	0.0501024	2.26802	24.2431	0.745985	0.0476954	4.2511	0.271263	4.31605	0.0412489	0.745985	0.17284	1365.17	0.314121	72.8196	6.87668	11.7225	5.53403	59.4749	16.167	142.808	55.2154	222.56	390.799	72.5585	8011.69	0.638872	26.6	1.3254	118.792	15.0474	79.2059	98.2954	298.869	447.838	580.519	1391
SUTH-31.1	0.157214	0.923324	386.013	409.848	262.017	3.57557	260.64	4.34124	192.966	64.861	-36.2636	24.0685	1.37819	0.0527712	1.71144	24.1514	1.38432	0.0499782	2.78943	0.285325	3.11404	0.0414055	1.38432	0.444541	616.84	8.39121	64.2346	3.3836	2.89573	1.28835	18.6598	5.555	57.2476	23.3515	104.593	217.135	43.6245	9469.27	0.534259	4.89547	35.406	104.787	7.40393	19.5657	22.8837	93.7678	153.878	232.714	653.709
SUT-11.1	-0.111052	-1.37977	298.866	143.872	263.11	5.13172	261.306	5.53894	203.456	71.0322	-29.711	24.0309	1.96938	0.0506286	2.58234	24.0436	1.97194	0.0502044	3.0607	0.287902	3.64094	0.0415912	1.97194	0.541603	332.285	0.105985	22.4974	0.300355	0.87978	0.463565	6.86303	2.28696	23.2887	12.0972	59.329	144.509	32.2155	9411.04	0.575061	67.6964	0.447194	36.7006	0.657231	5.94446	8.23383	34.4876	63.3508	94.6693	370.806
SUT-1.1	-0.175831	-1.10078	366.747	361.629	265.2	1.89157	262.884	2.60087	215.371	78.6809	-23.4464	23.8531	0.709168	0.0501561	2.2315	23.844	0.727402	0.0504631	3.39764	0.291808	3.47463	0.0419394	0.727402	0.209346	916.261	0.150572	69.9849	1.59354	3.81148	1.42111	26.1438	7.84663	73.6145	36.8454	156.27	300.274	56.6009	9284.19	0.433957	76.7048	0.635326	114.168	3.48695	25.7533	25.2418	131.376	217.358	299.246	976.689
SUT-18.1	-0.00722477	-0.0673844	222.725	148.075	265.384	2.25402	264.316	2.61016	182.256	104.262	-46.2258	23.7961	0.839908	0.0515119	2.92157	23.8484	0.864282	0.0497487	4.47512	0.287623	4.55781	0.0419315	0.864282	0.189627	905.06	0.0066795	41.9684	0.546492	1.94101	0.726854	15.6377	6.62691	80.4227	36.3006	167.696	344.954	62.8018	10197.5	0.402157	372.932	0.0281836	68.4639	1.19582	13.1149	12.9104	78.5814	183.571	326.921	1048.1
SUT-3.1	0.140683	0.956489	488.503	429.625	265.508	2.62675	262.848	2.98853	303.999	105.797	12.8285	23.7495	0.957137	0.0527004	4.52806	23.757	0.959009	0.052448	4.64224	0.304395	4.74027	0.0420928	0.959009	0.202311	344.951	0.204013	37.2429	0.479849	1.06604	0.54274	8.13992	2.57937	25.8319	12.5099	59.001	134.332	28.6941	9199.64	0.561621	63.9049	0.860815	60.7552	1.05	7.20298	9.64014	40.9041	71.4507	105.008	368.756
SUT-2.1	0.133347	1.02373	364.332	301.431	267.191	1.90351	267.132	2.58162	270.429	65.3456	1.21325	23.5985	0.707621	0.0526796	2.17442	23.6279	0.716954	0.0516834	2.85007	0.301597	2.93886	0.0423229	0.716954	0.243956	1323.94	0.349428	36.5755	2.16157	5.65563	1.78792	43.8491	14.4846	136.911	56.8523	220.91	344.822	59.2479	9767.43	0.34608	22.5943	1.47438	59.6664	4.72992	38.2137	31.757	220.347	401.234	556.549	1380.69
SUTH-30.1	-0.0817549	-0.263047	633.719	1239.27	269.714	3.30024	266.49	4.9985	251.155	33.0845	-7.49002	23.4235	1.23728	0.0510034	1.3611	23.4164	1.23766	0.0512515	1.43798	0.301778	1.89725	0.0427051	1.23766	0.65234	1239.03	0.0231373	99.2562	2.34536	5.83956	2.33005	39.5323	11.9777	117.412	46.2794	199.041	353.768	63.2528	9294.37	0.467464	61.9227	0.0976259	161.919	5.13208	39.4565	41.3863	198.655	331.794	477.284	1244
SUT-13.1	2.64805	12.0761	92.8909	110.501	270.107	4.20356	265.975	5.34487	#NUM!	#NUM!	#NUM!	22.7508	1.14705	0.0729101	11.5915	24.0941	1.86701	0.0268192	56.3542	0.153475	56.3851	0.041504	1.86701	0.0331117	542.715	0.739217	23.5755	0.917534	1.71518	0.815154	14.276	4.8848	50.2045	21.1543	94.6597	175.729	33.0404	8475.65	0.502147	15.3687	3.11906	38.4593	2.00773	11.589	14.4788	71.7388	135.313	204.084	591.623
SUT-10.1	0.120706	2.29106	379.121	119.985	270.235	1.91028	269.61	2.00923	271.033	63.3918	0.298333	23.3301	0.702564	0.0526469	2.13524	23.3578	0.71111	0.051697	2.76515	0.305165	2.85512	0.0428123	0.71111	0.249065	450.71	0.0160788	15.0823	0.233257	0.987044	0.146054	8.9998	3.25893	38.4098	17.8221	80.4441	151.318	27.9538	11213.6	0.149375	132.219	0.0678429	24.6041	0.51041	6.66921	2.5942	45.2251	90.2752	156.138	502.776
SUT-14.1	-0.0561175	-0.472313	341.199	248.065	270.604	2.01369	268.791	2.63969	76.9409	110.494	-255.227	23.3389	0.737878	0.0512373	2.44475	23.4456	0.771648	0.0475707	4.65099	0.279756	4.71457	0.0426519	0.771648	0.163673	669.157	0.997601	41.6298	1.87687	3.58123	1.22081	17.7787	6.24339	64.0416	25.4503	115.841	221.476	40.2689	8665.69	0.466372	16.3335	4.20929	67.9115	4.10694	24.1975	21.6841	89.3401	172.947	260.332	724.004
SUT-15.1	-0.29097	-1.70339	380.506	373.61	270.947	1.98503	264.6	2.65709	146.023	65.7837	-86.7353	23.3635	0.728149	0.0493617	2.37112	23.3744	0.733605	0.0489836	2.80481	0.288942	2.89916	0.0427818	0.733605	0.253041	534.578	0.0467606	48.5188	0.863116	1.90734	0.797772	14.1321	4.65519	51.8097	20.5871	91.9883	192.95	36.3057	10002.5	0.468392	129.66	0.197302	79.1497	1.88866	12.8874	14.17	71.0158	128.953	210.608	574.927
SUTH-35.1	0.00676009	0.156194	377.047	103.274	271.239	2.22511	271.015	2.28891	253.611	78.8041	-7.04595	23.2685	0.80481	0.0517565	3.28157	23.2814	0.806718	0.0513062	3.42665	0.303852	3.52033	0.0429527	0.806718	0.22916	349.924	0.02603	14.0908	0.194725	0.615774	0.13163	5.82472	2.24887	27.1641	13.1564	64.5885	146.979	29.2963	10688.7	0.211863	85.7829	0.109831	22.9866	0.426094	4.16063	2.33801	29.2699	62.2956	110.423	403.678
SUT-26.1	0.257516	1.76278	39.0447	36.06	272.47	4.66654	272.45	5.87007	-525.171	1090.24	154.217	23.103	1.66991	0.0537946	7.05509	23.5751	2.46109	0.0374511	40.7374	0.219035	40.8116	0.0424177	2.46109	0.0603035	365.297	0.0122354	11.2881	0.588	1.50938	0.614029	10.6563	3.39575	33.687	14.7634	67.0951	124.608	22.5343	8638.23	0.466698	71.4489	0.0516263	18.4146	1.28665	10.1985	10.9064	53.5492	94.0652	136.939	419.344
SUTH-36.1	-0.106363	-0.79819	218.273	179.542	275.522	2.41384	273.41	2.82993	236.876	52.4313	-16.5424	22.925	0.876732	0.0509348	2.27298	22.925	0.876732	0.0509348	2.27298	0.306342	2.43621	0.0436205	0.876732	0.359876	873.086	0.0236479	18.2362	2.38207	4.11979	1.49422	26.2787	8.30355	86.3182	33.5204	149.477	287.988	52.4407	8485.3	0.437748	11.2003	0.09978	29.749	5.21241	27.8364	26.5403	132.054	230.015	350.887	934.233
SUTH-41.1	0.443527	3.54382	263.713	206.735	281.809	3.02244	281.825	3.44415	247.188	105.88	-14.205	22.2795	1.06578	0.0555412	3.15982	22.4002	1.08285	0.0511632	4.59867	0.314925	4.72444	0.0446424	1.08285	0.229203	457.167	0.137383	18.7537	0.702873	1.06776	0.467426	7.87357	3.044	38.3604	16.6696	83.0465	205.575	42.7512	9143.04	0.491404	28.893	0.579675	30.5932	1.53802	7.2146	8.30241	39.5657	84.3214	155.936	519.041
SUTH-32.1	0.246444	2.50048	332.411	201.691	293.55	2.37383	292.759	2.63649	378.73	38.556	22.8156	21.4111	0.812455	0.0542082	1.71437	21.4111	0.812455	0.0542082	1.71437	0.349082	1.89714	0.0467047	0.812455	0.428252	635.143	0.0118355	36.1611	0.472522	1.35381	0.454459	11.9713	4.15738	49.8439	23.4359	115.081	256.956	50.7313	9271.51	0.344108	108.848	0.0499388	58.9904	1.03397	9.14737	8.0721	60.1572	115.163	202.617	719.257
SUT-4.1	-0.174274	-1.25496	160.62	135.728	299.496	2.60682	296.436	3.12124	160.075	100.953	-88.4246	21.0647	0.864606	0.0509447	2.85732	21.1083	0.885652	0.0492783	4.31548	0.321886	4.40542	0.0473746	0.885652	0.201037	867.797	0.116219	31.3937	0.782145	1.95294	0.990253	17.1647	6.87408	75.9908	35.8364	166.871	333.518	63.6969	9530.91	0.521354	55.9025	0.490376	51.2132	1.71148	13.1955	17.5889	86.2549	190.418	308.906	1042.94
SUT-17.1	-0.0355307	-0.513993	689.405	286.306	301.038	1.93842	299.481	2.14725	280.919	43.8678	-7.26924	20.9253	0.64561	0.0520945	1.56386	20.9298	0.649513	0.0519206	1.91692	0.342039	2.02397	0.0477788	0.649513	0.320911	1392.07	0.236343	49.6065	0.551363	1.80095	0.560927	19.1813	9.09099	121.106	53.3503	261.085	577.274	107.852	11000.5	0.290914	73.7768	0.997228	80.9241	1.20648	12.1686	9.96318	96.3885	251.828	492.299	1631.78
SUTH-38.1	0.269561	2.22426	512.197	400.418	467.65	3.63506	468.139	4.48018	523.217	28.4009	10.8506	13.2549	0.790234	0.058588	1.11246	13.267	0.791553	0.0578523	1.29485	0.60124	1.51763	0.0753748	0.791553	0.521573	2022.68	0.339325	22.8173	2.25506	5.25699	0.560821	48.0797	17.2409	200.686	80.0326	344.571	559.407	97.1059	9357.19	0.107529	11.6937	1.43175	37.2224	4.93448	35.5202	9.9613	241.606	477.587	815.799	2153.57
SUTH-39.1	-0.111124	-1.38362	392.694	197.222	474.942	3.81469	472.755	4.08791	459.534	32.2302	-3.42792	13.0937	0.815985	0.0557011	1.32043	13.0855	0.817178	0.0562056	1.45345	0.592228	1.66742	0.0764202	0.817178	0.490086	1711.18	0.172838	22.8884	1.1503	2.33235	0.832653	28.7382	11.7287	144.787	65.8867	312.334	604.579	113.548	10178.5	0.310018	23.0034	0.729275	37.3383	2.51706	15.7591	14.7896	144.413	324.894	588.567	1952.09
SUT-12.1	0.239231	7.6599	791.249	219.878	555.902	3.44813	563.245	3.5332	571.249	29.0405	2.75446	11.0769	0.631911	0.0606734	0.967161	11.0978	0.63521	0.0591384	1.33484	0.734737	1.47827	0.0901076	0.63521	0.429697	341.827	1.94336	50.0883	5.42883	3.57618	1.59803	13.7179	3.4571	31.7372	13.1116	47.5626	92.3524	17.2444	8339.37	0.695475	8.27901	8.19983	81.7102	11.8793	24.1634	28.3843	68.9343	95.7646	129.013	297.266
SUTH-34.1	0.0172516	0.370908	579.565	168.34	572.861	4.26357	571.66	4.37569	556.245	21.6067	-3.06431	10.7586	0.760673	0.0593211	0.873887	10.7664	0.761376	0.0587325	0.990631	0.752155	1.24942	0.0928812	0.761376	0.609385	1305.16	0.0538169	7.29202	0.564154	2.01523	0.165252	23.3338	9.97292	122.572	54.3889	247.615	453.394	81.0081	11689	0.0734582	16.2781	0.227075	11.8956	1.23447	13.6164	2.9352	117.255	276.258	498.259	1547.59
SUT-6.1	-0.254986	-3.45651	109.934	49.2284	574.839	9.60402	569.924	10.3006	381.555	104.911	-52.0367	10.7491	1.70345	0.0571552	2.75244	10.7869	1.72045	0.0542764	4.66711	0.693771	4.97412	0.0927052	1.72045	0.345881	1089.95	0.0247122	3.1534	0.745811	2.41997	0.266267	23.123	9.12992	105.051	43.8962	189.374	327.312	58.0487	9622.12	0.108502	12.4704	0.104271	5.14421	1.63197	16.3512	4.72943	116.196	252.906	427.035	1183.59
SUT-16.1	0.453352	8.75104	218.282	69.3315	917.006	7.63272	916.081	7.73857	1019.94	31.0374	10.4373	6.51204	0.853857	0.0734181	1.32621	6.51338	0.856517	0.073248	1.53295	1.55057	1.756	0.15353	0.856517	0.487765	1356.3	0.0637572	17.1674	2.77525	6.2865	0.0701881	44.8325	14.8461	138.638	58.2559	229.003	352.095	58.8969	8354.74	0.0127442	21.9109	0.269018	28.0055	6.07276	42.4763	1.24668	225.289	411.248	563.567	1431.27
SUT-8.1	-0.269737	-5.14932	135.235	49.6528	1057.74	9.58126	1055.66	9.62671	979.758	32.5856	-8.26751	5.62333	0.931891	0.0723693	1.41728	5.62704	0.933904	0.071813	1.59958	1.75964	1.85225	0.177713	0.933904	0.504199	559.439	0.380561	10.2846	1.09907	1.55788	0.175819	12.9092	4.95046	52.4034	23.5669	101.008	171.583	30.1999	9345.37	0.119508	8.53759	1.60574	16.7776	2.40498	10.5262	3.1229	64.8703	137.132	213.022	631.3
SUTH-37.1	0.0978934	1.65464	244.512	93.1973	1091.57	9.27496	1089.67	9.22225	1104.23	36.1713	1.18582	5.41444	0.861738	0.0766714	1.78186	5.41644	0.86213	0.0763819	1.80925	1.94437	2.00416	0.184623	0.86213	0.43017	338.341	0.255812	22.4833	1.60974	1.28004	0.409986	8.51467	2.58545	30.7911	12.4022	60.0162	147.254	29.0388	9471.65	0.378549	15.9406	1.07937	36.6776	3.52241	8.64891	7.28216	42.7873	71.6191	125.167	375.101
SUTH-33.1	0.905537	6.52184	85.4244	80.3826	1750.24	28.6347	1756.18	29.302	1844.59	17.4322	5.12392	3.17673	1.64152	0.113974	0.858287	3.1816	1.64272	0.112823	0.9634	4.88937	1.90438	0.314307	1.64272	0.8626	655.015	0.264454	44.6328	1.11851	2.48496	0.827482	18.323	5.70824	61.1828	26.894	115.272	211.458	39.4659	6476	0.373808	40.8662	1.11584	72.8104	2.44751	16.7903	14.6977	92.0755	158.123	248.711	720.447
Spot Name	7-corr %com 206	7-corr %com 208	ppm U	ppm Th	207corr 206Pb /238U Age	1s err	208corr 206Pb /238U Age	1s err	204corr 207Pb /206Pb Age	1s err	% Dis- cor- dant	Total 238 /206	% err	Total 207 /206	% err	4corr 238 /206*	% err	4corr 207* /206*	% err	4corr 207* /235	% err	4corr 206* /238	% err	err corr	Y (ppm)	La (ppm)	Ce (ppm)	Nd (ppm)	Sm (ppm)	Eu (ppm)	Gd (ppm)	Tb (ppm)	Dy (ppm)	Ho (ppm)	Er (ppm)	Yb (ppm)	Lu (ppm)	Hf (ppm)	Eu (star)	Ce (star)	La (ch)	Ce (ch)	Nd (ch)	Sm (ch)	Eu (ch)	Gd (ch)	Tb (ch)	Dy (chn)	Er (ch)
12ZA45-1.1	-0.18145	-2.51775	645.028	293.903	270.638	2.12217	269.845	2.27164	120.899	56.8033	-125.576	23.3651	0.787466	0.050233	1.71609	23.4166	0.793501	0.0484628	2.41068	0.285356	2.53791	0.0427047	0.793501	0.312659	1346.6	0.143176	17.099	1.77244	3.71882	0.879473	30.0862	11.1477	138.158	55.9306	252.283	451.16	81.0139	8043.51	0.253446	18.2231	0.604117	27.894	3.87842	25.1271	15.6212	151.187	308.801	561.616	1576.77
12ZA45-4.1	0.0358664	0.661241	256.405	83.2397	444.753	3.32448	442.878	3.36568	430.499	72.3334	-3.38095	13.9951	0.733952	0.0561232	3.02238	14.0063	0.737677	0.0554763	3.24554	0.546117	3.32832	0.0713965	0.737677	0.221636	1094.05	0.027283	3.87227	0.661754	2.32353	0.129662	22.5339	9.2673	111.426	47.4522	209.844	377.788	66.2493	8501.05	0.054622	15.4719	0.115118	6.31691	1.44804	15.6995	2.30305	113.236	256.712	452.95	1311.53
12ZA45-5.1	1.46257	16.1108	452.78	236.452	453.76	4.48057	455.032	4.80256	521.068	102.043	13.1905	13.512	0.974502	0.0679122	3.05902	13.6832	0.996218	0.0577956	4.6506	0.582385	4.7561	0.0730826	0.996218	0.209461	1757.38	1.33112	19.9098	9.47332	10.6303	1.2522	54.3649	18.5881	176.27	76.1355	328.397	534.324	90.1726	10101.8	0.158778	3.01008	5.61652	32.4792	20.7294	71.8266	22.2415	273.19	514.906	716.545	2052.48
12ZA45-6.1	0.488713	15.9949	300.569	57.8101	455.446	3.33249	457.099	3.3798	597.076	48.6882	24.2152	13.5932	0.737482	0.060063	1.63407	13.5969	0.74624	0.0598462	2.24769	0.606875	2.36833	0.0735464	0.74624	0.315091	1534.09	0.0458116	2.40767	0.539713	2.29317	0.110565	26.5097	11.4307	138.589	63.9092	290.341	526.961	94.9489	10625.2	0.043226	8.22053	0.193298	3.92769	1.18099	15.4944	1.96385	133.215	316.64	563.37	1814.63
12ZA45-2.1	0.0493296	0.841653	207.244	75.7268	457.455	3.70249	456.421	4.1206	461.247	54.1448	0.839803	13.5911	0.812427	0.0565528	2.20371	13.5962	0.815542	0.056249	2.44243	0.570425	2.57499	0.0735499	0.815542	0.316717	1560.82	0.0227311	2.48798	1.80103	4.64513	0.268301	36.6473	14.3811	167.35	66.1603	295.448	515.257	92.1646	8200.35	0.0626833	6.60158	0.0959118	4.05869	3.94097	31.386	4.76557	184.157	398.369	680.286	1846.55
12ZA45-4.2	-0.0658069	-0.783304	295.974	167.642	461.73	4.92345	462.729	5.39423	383.025	55.9379	-21.0035	13.4763	1.08356	0.0557278	1.65827	13.4998	1.09032	0.0543119	2.48913	0.554714	2.71745	0.0740753	1.09032	0.40123	1860.45	0.137457	5.56117	3.71124	7.08304	0.641853	54.6027	19.4078	208.642	82.3368	342.112	546.742	94.0174	8410.32	0.0994873	4.18018	0.579986	9.07205	8.12087	47.8584	11.4006	274.385	537.612	848.138	2138.2
12ZA45-7.2	1.42451	19.6268	604.438	268.721	516.071	14.1166	520.58	15.1232	382.855	101.721	-35.652	11.8271	2.7983	0.06925	1.36392	12.0475	2.81197	0.0543077	4.52625	0.621535	5.32861	0.0830047	2.81197	0.527712	1435.1	2.17444	25.2267	12.6543	9.606	1.50082	37.9407	13.0683	142.09	64.0128	250.624	426.763	72.2305	9135.96	0.239637	2.5819	9.17486	41.1529	27.6898	64.9054	26.6576	190.657	362.003	577.602	1566.4
12ZA45-7.1	0.75627	11.7708	460.734	207.289	522.191	3.70541	528.275	4.04343	597.192	65.0954	12.8566	11.762	0.71723	0.0639783	1.47672	11.8222	0.741513	0.0598494	3.00519	0.698013	3.09532	0.0845867	0.741513	0.23956	992.567	1.14586	20.1822	8.83696	6.08011	1.1127	26.8132	9.20769	112.465	43.7092	175.078	300.359	53.2268	9528.9	0.265642	3.40504	4.83486	32.9237	19.3369	41.0818	19.7638	134.74	255.061	457.174	1094.24
12ZA45-3.1	0.245183	4.74088	237.022	82.3293	1098.03	8.48309	1098.51	8.3726	1153.65	37.2181	4.99869	5.37186	0.783207	0.0782074	1.84341	5.37126	0.783915	0.0783006	1.87524	2.00997	2.03249	0.186176	0.783915	0.385691	1431.53	0.0374319	5.46634	2.02445	5.00853	0.443781	38.2345	13.9448	141.657	61.7367	255.735	420.716	70.6135	8809.05	0.0977541	10.6609	0.157941	8.91736	4.42987	33.8414	7.88243	192.133	386.282	575.842	1598.34
Spot Name	7-corr %com 206	7-corr %com 208	ppm U	ppm Th	207corr 206Pb /238U Age	1s err	208corr 206Pb /238U Age	1s err	204corr 207Pb /206Pb Age	1s err	% Dis- cor- dant	Total 238 /206	% err	Total 207 /206	% err	4corr 238 /206*	% err	4corr 207* /206*	% err	4corr 207* /235	% err	4corr 206* /238	% err	err corr	Y (ppm)	La (ppm)	Ce (ppm)	Nd (ppm)	Sm (ppm)	Eu (ppm)	Gd (ppm)	Tb (ppm)	Dy (ppm)	Ho (ppm)	Er (ppm)	Yb (ppm)	Lu (ppm)	Hf (ppm)	Eu (star)	Ce (star)	La (ch)	Ce (ch)	Nd (ch)	Sm (ch)	Eu (ch)	Gd (ch)	Tb (ch)	Dy (chn)	Er (ch)
13ZA75A-9.1	15.7232	63.6624	1655.08	3253.03	182.23	2.74966	234.247	4.89617	7.62025	424.853	-2313.38	29.3937	1.30712	0.175195	2.99971	35.0322	1.46072	0.0462115	17.6511	0.18188	17.7114	0.0285452	1.46072	0.0824733	6556.19	233.038	1228.33	447.947	124.003	61.7977	466.802	111.457	744.973	253.076	944.766	1545.95	250.123	9283.77	0.78296	2.04108	983.284	2003.8	980.19	837.855	1097.65	2345.74	3087.45	3028.34	5904.79
13ZA75A-13.1	1.6807	17.9867	192.818	149.275	263.252	2.2744	275.744	2.81551	471.221	134.107	44.6927	23.5878	0.851595	0.0649937	2.45632	23.842	0.932169	0.0565029	6.05986	0.326761	6.13114	0.0419429	0.932169	0.152039	770.643	6.71184	54.3575	22.2334	10.8199	2.77749	29.739	8.10666	79.8309	31.9904	132.043	224.571	39.1605	7747.3	0.471983	2.38895	28.32	88.6745	48.6507	73.1074	49.3338	149.442	224.561	324.516	825.266
13ZA75A-6.1	0.315728	1.12773	206.384	356.208	265.069	2.25824	261.979	3.51149	308.289	88.7002	14.2041	23.748	0.843824	0.0540938	2.69034	23.794	0.862682	0.0525469	3.89504	0.304496	3.98943	0.0420275	0.862682	0.216242	1651.54	0.119325	77.5939	6.71276	12.6916	4.9381	70.5037	20.0022	154.934	69.1445	279.321	437.813	74.2992	8147.66	0.503204	46.546	0.503482	126.581	14.6888	85.7541	87.7104	354.29	554.078	629.814	1745.75
13ZA75A-3.1	0.0197957	0.0687576	271.115	469.222	269.417	2.02644	262.878	3.16349	186.315	86.5975	-45.2133	23.4261	0.746107	0.0518193	2.41716	23.4841	0.765159	0.0498355	3.71971	0.292595	3.79759	0.0425821	0.765159	0.201485	1840.64	0.814955	101.858	10.5229	16.7095	7.8623	84.5723	22.5077	184.999	78.7147	307.206	494.662	86.146	7007.82	0.637533	18.6739	3.43863	166.163	23.0259	112.902	139.65	424.986	623.481	752.027	1920.04
13ZA75A-2.1	0.326562	1.78451	789.688	857.596	269.788	2.23553	266.245	2.76666	338.649	45.1916	20.6047	23.3214	0.834091	0.0542875	1.43956	23.3516	0.838913	0.053254	1.99523	0.31444	2.16442	0.0428237	0.838913	0.387592	1657.75	0.381462	24.3812	3.06247	7.25941	1.48573	56.5336	17.7659	156.857	71.0829	286.59	441.072	74.1394	7820.76	0.223555	12.1106	1.60954	39.7736	6.70124	49.0501	26.3894	284.088	492.129	637.629	1791.19
13ZA75A-7.1	-0.0835618	-0.220396	171.838	396.032	270.555	3.70089	262.053	6.4948	153.859	111.141	-76.894	23.3496	1.3728	0.0510161	3.0468	23.404	1.38965	0.0491476	4.74555	0.289543	4.94483	0.0427278	1.38965	0.281031	1838.33	0.185913	49.5065	7.36017	13.6796	8.07182	78.9987	22.6649	210.667	76.1966	303.04	525.93	94.8546	6770.77	0.74847	22.7214	0.784444	80.761	16.1054	92.4295	143.372	396.978	627.836	856.37	1894
13ZA75A-10.1	-0.173732	-1.96053	521.071	286.866	271.878	1.75365	270.58	1.92824	180.514	48.8426	-51.3123	23.2546	0.644674	0.0503228	1.73567	23.2723	0.648519	0.0497115	2.09576	0.294523	2.1938	0.0429696	0.648519	0.295614	680.568	0.0153583	33.5857	0.746905	2.10819	0.639695	16.6391	5.91798	63.5583	27.0543	122.463	248.381	44.5208	9806.96	0.329232	168.354	0.0648028	54.7891	1.63437	14.2445	11.3622	83.6135	163.933	258.367	765.395
13ZA75A-8.1	0.0340132	7.83262	533.805	14.8756	278.179	3.04651	278.27	3.0236	262.971	47.444	-5.86344	22.6695	1.1047	0.0521314	1.72215	22.6869	1.10699	0.0515157	2.0665	0.313087	2.34433	0.0440783	1.10699	0.472201	792.605	0.0369154	0.468597	0.34491	1.77547	0.0640937	20.7159	9.17185	90.9657	30.407	110.413	157.415	24.5646	11758.7	0.0322148	2.22954	0.155761	0.764432	0.754727	11.9965	1.13843	104.1	254.068	369.779	690.082
13ZA75A-11.1	0.0494066	0.367247	300.191	259.664	285.393	3.23752	285.533	3.94573	72.9003	139.479	-295.785	22.0806	1.12155	0.0524188	3.92641	22.2163	1.14508	0.0474899	5.86662	0.294735	5.97733	0.0450121	1.14508	0.19157	2537.74	0.284179	17.3746	8.07083	16.1435	4.3676	101.679	30.6447	292.052	115.419	444.44	661.043	111.527	6211.89	0.328608	6.1593	1.19907	28.3435	17.6605	109.078	77.5772	510.948	848.882	1187.2	2777.75
13ZA75A-4.1	-0.0569257	-1.14428	712.415	217.823	430.958	3.5413	429.485	3.69239	385.006	32.4124	-12.1829	14.4722	0.834968	0.055027	1.14836	14.4841	0.836927	0.0543598	1.44279	0.517473	1.66796	0.0690413	0.836927	0.501766	1635.47	0.0133532	10.9374	1.01473	4.14686	0.476899	37.6176	14.4889	155.561	67.4803	303.033	540.005	97.164	10654.2	0.116391	50.4447	0.0563426	17.8423	2.22042	28.0193	8.47067	189.033	401.354	632.362	1893.96
13ZA75A-5.1	0.120878	2.2654	246.746	81.2406	469.131	5.24022	468.241	5.44688	435.193	59.944	-7.97187	13.2312	1.13401	0.05743	1.86227	13.2612	1.14128	0.0555933	2.69184	0.578017	2.92378	0.0754078	1.14128	0.390344	1036.52	0.0802843	15.1354	0.349141	1.28699	0.339137	14.5801	6.93546	81.8454	42.8494	199.115	416.856	76.7917	10645.1	0.238648	48.5344	0.338753	24.6907	0.763985	8.69584	6.02374	73.2666	192.118	332.705	1244.47
13ZA75A-14.1	0.0320117	1.72936	909.675	106.791	505.096	3.93583	504.944	3.9361	461.544	29.5288	-9.66001	12.2654	0.794653	0.0576372	0.952869	12.2862	0.797109	0.0562566	1.33209	0.631331	1.55237	0.0813922	0.797109	0.51348	2495.06	4.0478	39.741	9.38532	7.11693	0.993799	54.0831	22.7301	241.915	103.593	463.743	741.46	119.865	9997.14	0.154408	3.4616	17.0793	64.8304	20.5368	48.0874	17.6519	271.774	629.641	983.395	2898.4
13ZA75A-1.1	-0.173544	-1.40443	139.441	107.208	530.223	5.06944	525.505	5.77793	391.008	82.3761	-36.5016	11.685	0.964993	0.0566249	2.41481	11.7154	0.981318	0.0545053	3.67072	0.64148	3.79963	0.0853578	0.981318	0.258267	1651.18	0.220502	15.1339	3.7992	7.26026	2.6494	51.4724	17.5499	183.41	70.9427	294.334	468.376	80.8713	7684.82	0.417766	8.87707	0.930386	24.6882	8.31334	49.0558	47.0585	258.655	486.147	745.57	1839.59
13ZA75A-12.1	0.0804546	51.0793	342.922	0.84223	584.378	4.10557	584.154	3.99974	560.241	38.8227	-4.4227	10.5303	0.714047	0.0601537	1.3645	10.5473	0.718463	0.0588402	1.78116	0.769193	1.9206	0.0948112	0.718463	0.374082	197.246	0.0216051	0.872454	0.0399986	0.198331	0.292314	4.49795	2.25239	21.977	7.1858	24.5768	30.9558	4.54582	9567.05	0.943402	15.9336	0.0911606	1.42325	0.0875242	1.34007	5.19208	22.6028	62.3931	89.3372	153.605
13ZA75A-15.1	1.82343	22.8723	311.274	133.941	1112.38	11.8742	1111.3	12.3904	1449.81	19.6983	24.0121	5.21273	1.10328	0.0920386	0.91829	5.21807	1.10444	0.0911933	1.03484	2.40965	1.5135	0.191642	1.10444	0.729726	994.583	0.0820074	12.9036	1.80465	3.57833	0.605074	27.1834	9.86595	98.7168	41.8751	179.919	298.922	52.8928	7662.8	0.18701	18.0078	0.346023	21.0499	3.94891	24.1779	10.7473	136.6	273.295	401.288	1124.49
[truncated: 7 more columns]

## Sheet: Table 3. Ti in zircon
Spot Name	7-corr %com 206	7-corr %com 208	ppm U	ppm Th	207corr 206Pb /238U Age	1s err		48Ti (ppm)	48Ti/ 49Ti	Fe (ppm)	Temp (48Ti)	Temp (48Ti)
12ZA23-13.1	0.270961	2.28861	251.17	184.107	248.914	1.73756		12.3433	13.4676	28.262	758.352	758.352
12ZA23-12.1	0.941623	13.9271	96.2265	38.9653	250.093	6.55845		27.704	13.8033	339.825	842.508	842.508
12ZA23-5.1	8.94684	49.8741	77.3963	42.1431	254.133	2.89404		22.8174	13.3073	79.4945	821.08	821.08
12ZA23-9.1	-0.106304	-1.01788	206.844	135.925	256.646	7.92668		8.0567	13.2523	0.317258	718.867	718.867
12ZA23-1.1	0.0536496	0.229	605.282	886.089	257.371	4.34209		13.0807	13.3069	0.121367	763.968	763.968
12ZA23-7.1	0.162381	1.01992	707.606	697.245	257.425	7.75835		9.06458	13.4052	4.20236	729.471	729.471
12ZA23-11.1	0.0725156	1.18267	625.053	239.258	260.279	6.45215		3.85896	13.1221	2.11041	657.405	657.405
12ZA23-4.1	0.097691	0.677467	419.831	383.658	260.432	5.81828		10.2355	13.6125	1.09029	740.641	740.641
12ZA23-16.1	0.113711	1.33148	705.19	380.645	262.082	4.84808		3.60049	14.4514	1.72088	652.007	652.007
12ZA23-6.1	0.0540032	0.526981	649.09	413.491	263.97	4.49508		8.21271	13.7599	2.43023	720.577	720.577
12ZA23-8.1	0.0248609	0.189826	852.679	713.738	264.434	4.12569		14.8821	13.5393	7.6841	776.674	776.674
12ZA23-14.1	0.35043	2.13139	493.731	486.313	264.45	4.11451		11.6575	13.3361	4.38801	752.88	752.88
12ZA23-3.1	0.107091	0.952019	1161.84	811.573	265.049	4.51664		5.83694	13.3029	0.561442	690.985	690.985
12ZA23-10.1	0.312188	4.67867	587.517	243.043	265.071	3.63606		7.89583	13.569	21.1018	717.075	717.075
12ZA23-2.1	0.133699	1.05076	229.804	180.653	265.267	4.12314		9.7835	13.1697	1.59791	736.459	736.459
12ZA23-15.1	-0.0437028	-0.441142	203.272	127.422	269.215	5.24962		15.5724	13.8872	0.279033	781.213	781.213
Spot Name	7-corr %com 206	7-corr %com 208	ppm U	ppm Th	207corr 206Pb /238U Age	1s err		48Ti (ppm)	48Ti/ 49Ti	Fe (ppm)	Temp (48Ti)	Temp (48Ti)
12ZA54-7.1	2.97932	21.6056	238.213	159.304	215.027	7.85499		12.38	13.5083	1109.36	759.055	759.055
12ZA54-5.1	0.181153	0.717625	613.488	981.292	241.484	8.5611		13.4612	13.2674	38.3472	767.188	767.188
12ZA54-12.1	0.100926	0.547819	339.387	391.126	256.615	6.81434		22.1394	12.7277	34.126	818.289	818.289
12ZA54-6.1	0.324785	2.27943	449.137	411.984	258.425	4.18468		12.8929	13.7539	17.0798	762.982	762.982
12ZA54-14.1	0.260195	1.48023	479.301	526.785	260.053	5.15598		12.9656	12.8698	3.66634	763.528	763.528
12ZA54-8.1	0.0380323	0.311311	763.968	609.349	261.309	1.60205		7.117	14.9242	9.11164	708.327	708.327
12ZA54-11.1	-0.24172	-2.34696	254.082	168.378	261.66	4.94367		14.6563	13.3073	0.100227	775.583	775.583
12ZA54-15.1	0.0447336	0.217631	707.223	937.258	263.418	3.43883		18.5776	13.3116	1.20688	799.711	799.711
12ZA54-16.1	0.148074	0.810873	362.336	421.639	266.367	3.33413		20.3593	13.0787	2.28043	809.331	809.331
12ZA54-9.1	0.136673	0.675546	615.748	797.758	269.068	3.16358		15.027	13.5468	3.71373	778.073	778.073
12ZA54-4.1	-0.102802	-0.853847	482.677	374.469	269.604	3.3534		14.8735	13.2493	0.389044	777.048	777.048
12ZA54-1.1	-0.126216	-1.0215	496.687	381.114	271.443	4.91282		11.4108	12.9763	0.138991	751.258	751.258
12ZA54-13.1	0.0274671	0.152212	470.73	539.426	276.695	1.74709		18.8405	13.0073	0.0448772	801.176	801.176
12ZA54-3.1	0.626135	10.0292	681.613	371.504	430.986	12.4487		8.45657	13.1319	105.42	723.587	723.587
12ZA54-10.1	-0.00955496	-0.269872	330.163	77.0159	455.515	3.25241		5.67654	13.5453	4.69764	689.011	689.011
12ZA54-2.1	0.118639	3.02394	487.853	109.582	458.05	10.3453		13.542	14.2701	31.0232	767.774	767.774
Spot Name	7-corr %com 206	7-corr %com 208	ppm U	ppm Th	207corr 206Pb /238U Age	1s err		48Ti (ppm)	48Ti/ 49Ti	Fe (ppm)	Temp (48Ti)	Temp (48Ti)
12ZA61-7.1	1.0994	10.1724	732.975	510.217	231.889	9.53346		9.44447	13.0724	250.037	740.887	740.887
12ZA61-9.1	1.39918	10.6124	859.856	679.091	233.862	8.28953		16.2421	13.0695	228.508	793.953	793.953
12ZA61-14.1	0.645394	5.66541	992.66	744.894	246.108	6.65261		9.17701	12.8641	107.786	738.222	738.222
12ZA61-12.1	0.107587	0.986989	587.889	405.349	252.543	4.43673		8.96093	14.2564	28.5725	736.022	736.022
12ZA61-10.1	0.682216	8.2207	402.509	216.634	256.687	5.17393		16.9448	13.4873	168.622	798.333	798.333
12ZA61-11.1	-0.075225	-0.493761	578.669	537.529	260.992	5.64259		9.86095	12.9792	1.89254	744.916	744.916
12ZA61-8.1	-0.0936713	-0.744671	371.408	292.441	263.527	3.8029		19.3781	13.324	1.0356	812.451	812.451
12ZA61-15.1	0.0351419	0.308639	846.989	606.069	263.832	4.34249		7.07076	13.4649	12.2888	714.661	714.661
12ZA61-4.1	0.036305	0.412994	475.928	279.357	264.422	5.40556		6.11047	13.3143	3.06326	701.944	701.944
12ZA61-1.1	0.276304	2.60958	484.914	314.567	265.903	4.61334		7.87396	12.7927	253.052	724.249	724.249
12ZA61-6.1	0.0698921	0.719684	452.526	276.949	266.718	4.35368		11.9152	13.2381	689.115	762.971	762.971
12ZA61-5.1	-0.0425501	-0.396339	309.331	213.098	268.765	3.33535		12.9038	13.8797	0.0452602	770.769	770.769
12ZA61-13.1	-0.0451728	-1.05989	721.449	193.81	273.669	4.37051		5.10002	13.8021	0.312068	686.642	686.642
12ZA61-2.1	-0.0476232	-0.338002	165.817	151.628	520.029	10.1164		27.2933	13.2768	2.0521	850.233	850.233
12ZA61-3.1	0.0405683	0.459683	216.058	130.193	1108.14	17.7717		5.33404	13.7685	22.1041	690.395	690.395
Spot Name	7-corr %com 206	7-corr %com 208	ppm U	ppm Th	207corr 206Pb /238U Age	1s err		48Ti (ppm)	48Ti/ 49Ti	Fe (ppm)	Temp (48Ti)	Temp (48Ti)
12ZA07-11.1	7.42732	37.8549	686.135	946.668	181.398	7.31248		44.455	13.6469	3497.51	931.826	931.826
12ZA07-25.1	0.0675437	0.621725	422.223	288.901	237.375	7.62832
12ZA07-9.1	0.128422	1.41782	367.828	207.432	245.605	8.18078		6.8951	14.0229	7.51118	728.385	728.385
12ZA07-6.1	0.136219	1.79578	500.669	232.551	250.853	5.0509		11.4556	13.1354	2.36069	776.666	776.666
12ZA07-7.1	0.0399572	0.557832	239.025	113.166	252.222	4.87947		10.827	13.7302	4.64433	771.071	771.071
12ZA07-8.1	0.268463	4.38668	263.004	99.1448	253.863	4.28961		8.32288	13.2792	26.7787	745.757	745.757
12ZA07-3.1	0.132816	1.7976	390.72	187.596	259.216	4.10069		8.94474	13.7186	6.66352	752.568	752.568
12ZA07-5.1	-0.00307329	-0.0316969	296.017	173.394	262.637	4.10413		9.50272	12.738	0.157679	758.359	758.359
12ZA07-10.1	-0.00478859	-0.0331634	800.402	735.006	266.399	4.15054		11.0355	13.4545	5.2855	772.955	772.955
12ZA07-4.1	0.0459093	0.695871	482.439	213.532	267.335	4.25727		12.2444	13.4692	0.331882	783.347	783.347
12ZA07-2.1	0.394458	6.70219	213.954	75.4679	539.331	9.90425		14.1366	13.3197	50.2637	798.057	798.057
12ZA07-1.1	-0.266295	-2.62563	113.331	75.2971	745.327	11.2499		34.0851	13.1806	28.923	897.922	897.922
Spot Name	7-corr %com 206	7-corr %com 208	ppm U	ppm Th	207corr 206Pb /238U Age	1s err		48Ti (ppm)	48Ti/ 49Ti	Fe (ppm)	Temp (48Ti)	Temp (48Ti)
12ZA46-4.1	7.9802	36.3491	601.935	775.657	229.496	10.8601		52.4295	13.4804	281.709	947.104	947.104
12ZA46-10.1	0.121259	0.589694	240.387	311.252	252.636	4.52251		10.3978	12.6778	6.70431	762.213	762.213
12ZA46-1.1	0.481158	4.09128	122.929	88.9123	257.165	5.27159		20.0358	12.9775	3.62323	829.976	829.976
12ZA46-5.1	-0.0874501	-0.711695	299.582	229.623	257.935	4.33462		10.5547	13.5337	0.410059	763.668	763.668
12ZA46-3.1	-0.103557	-0.819415	473.855	384.89	260.035	3.78336		15.3992	13.2303	0.207945	801.746	801.746
12ZA46-7.1	0.144413	1.25555	210.889	148.792	275.893	4.16447		14.0466	13.785	4.29787	792.224	792.224
12ZA46-6.1	-0.165033	-1.4181	148.27	109.721	285.45	7.19486		14.4987	12.9689	4.87523	795.486	795.486
12ZA46-2.1	0.145393	1.50785	945.387	514.218	325.221	11.0226		8.47783	13.2099	12.2458	742.791	742.791
12ZA46-9.1	0.105183	1.1054	663.629	411.929	463.731	8.56704		14.5733	13.1571	2.30288	796.016	796.016
12ZA46-8.1	-0.103694	-5.30327	412.478	50.6925	477.704	3.0436		11.5825	13.8243	4.2101	772.782	772.782
12ZA46-11.1	-0.0699012	-0.77999	145.778	84.078	523.473	8.96922		32.6235	13.0545	11.6087	886.382	886.382
Spot Name	7-corr %com 206	7-corr %com 208	ppm U	ppm Th	207corr 206Pb /238U Age	1s err		48Ti (ppm)	48Ti/ 49Ti	Fe (ppm)	Temp (48Ti)	Temp (48Ti)
12ZA22B-4.1	5.51887	52.5689	988.06	404.408	243.771	4.57071		35.7308	13.2223	175.75	914.018	914.018
12ZA22B-7.1	1.35535	19.4371	231.445	78.9515	247.863	8.43931		4.70841	13.5379	14.4632	701.834	701.834
12ZA22B-6.2	0.139544	2.13601	474.366	195.808	257.856	4.16378		4.75369	13.9515	0.894256	702.658	702.658
12ZA22B-5.1	1.39569	16.9657	1113.02	507.916	258.544	4.82165		9.26778	13.4046	64.3765	763.759	763.759
12ZA22B-1.1	0.919404	9.74894	115.069	61.2962	260.641	2.76182		17.5147	13.7115	152.77	829.59	829.59
12ZA22B-2.1	0.0858039	1.25085	480.497	202.1	264.207	3.68324		4.27721	12.4269	1.78962	693.645	693.645
12ZA22B-6.1	-0.188366	-1.99198	414.379	243.311	264.762	4.74048		9.42127	13.4149	0.427827	765.359	765.359
12ZA22B-3.1	0.148124	1.98088	592.858	264.118	265.895	3.08915		7.45163	13.3526	34.0069	742.972	742.972

## Sheet: Table 4. UTM Sample Locations
	WGS1984 Datum		( E )	( S )	Data presented in this study
	Sample ID	Zone	Easting	Northing	SHRIMP Age	SHRIMP geochem	Whole rock
	09LGC-01	34H	499591	6321783			X
	09LGC-04	34H	499614	6321821			X
	09LGV-01	34H	499653	6321854			X
	09LGV-02	34H	499631	6321986			X
	09LGV-04	34H	499587	6322155			X
	09TBT-01	34J	381726	6493248			X
	09TBT-04	34J	382146	6494390			X
	12ZA05B	34H	468362	6339683		X
	12ZA07	34H	405027	6393983		X	X
	12ZA08	34H	404351	9374562		X	X
	12ZA10	34H	404352	63494738		X	X
	12ZA12	34H	436541	6414097			X
	12ZA16	34H	438007	6414177		X	X
	12ZA18	34H	443935	6419135		X
	12ZA19	34H	643534	6333624		X	X
	12ZA22A&B	34H	643542	6334491		X	X
	12ZA23	34H	643558	6334551		X	X
	12ZA45	35H	467444	6345581		X	X
	12ZA46	35H	466973	6345303		X	X
	12ZA54	35H	465066	6324815		X	X
	12ZA55	35H	465184	6324766		X	X
	12ZA60	35H	464923	6325655		X
	12ZA61	35H	463796	6328315		X	X
	13ZA67	35H	464802	6325212		X
	13ZA72A	35H	465441	6361597		X	X
	13ZA75B	35H	466981	6345320		X	X
	13ZA76	35H	467384	6345555		X	X
	13ZA77	35H	463485	6335583			X
	13ZA78A	35H	464393	6327210			X
	13ZA79	35H	464762	6325361			X
	13ZA93A	34H	456880	6397502		X	X
	14ZA116A	34H	498466	6322788	X	X	X
	14ZA121	34H	461573	6331369	X	X	X
	14ZA128A	34H	443811	6418968			X
	14ZA129A	34H	568541	6447715			X
	14ZA130A	34H	560632	6428940	X	X	X
	14ZA141	34H	373943	6266659			X
	14ZA142	34H	373774	6265469	X	X	X
	14ZA154	35H	464299	6326517	X	X	X
	14ZA161A	35H	484158	6404712	X	X	X
	14ZA162A	35H	481244	6401608			X
	14ZA168A	35H	271276	6441037	X	X	X
	BLOUKRANS	34H	492420	6343593		X	X
	SUTHER	34H	465375	6412116		X	X
